# Supplementary material for: The New Genetic Landscape of Cushing’s Disease: Deubiquitinases in the Spotlight
Source: MDPI journal article supplement (doi:10.3390/cancers11111761), 2019-11-08
Supplement: s1 [file s1]

# Supplementary Data: The New Genetic Landscape of Cushing's Disease: Deubiquitinases in the Spotlight

Silviu Sbiera, Meik Kunz, Isabel Weigand, Timo Deutschbein, Thomas Dandekar and Martin Fassnacht

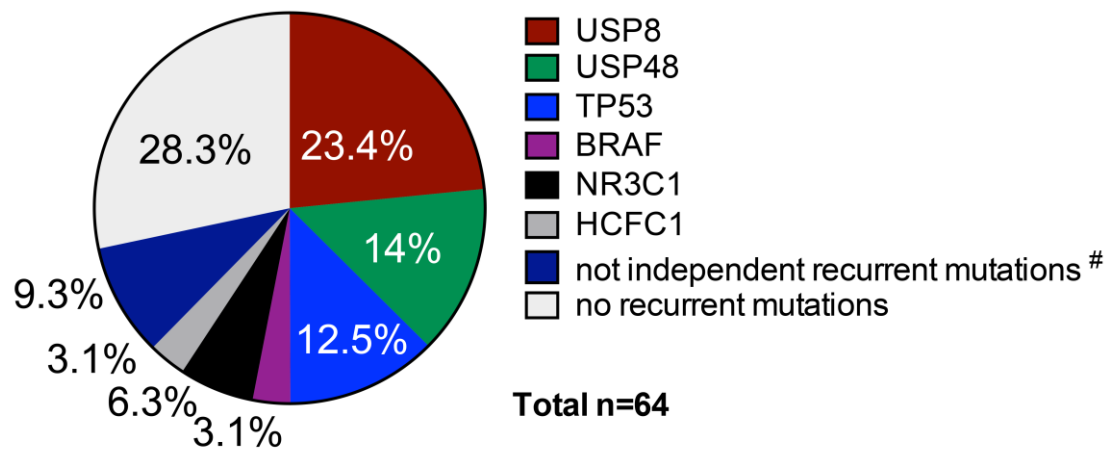

**Figure S1.** Alternative incidence of published recurrent somatic mutations associated with Cushing's disease when considering only the results from next generation sequencing.

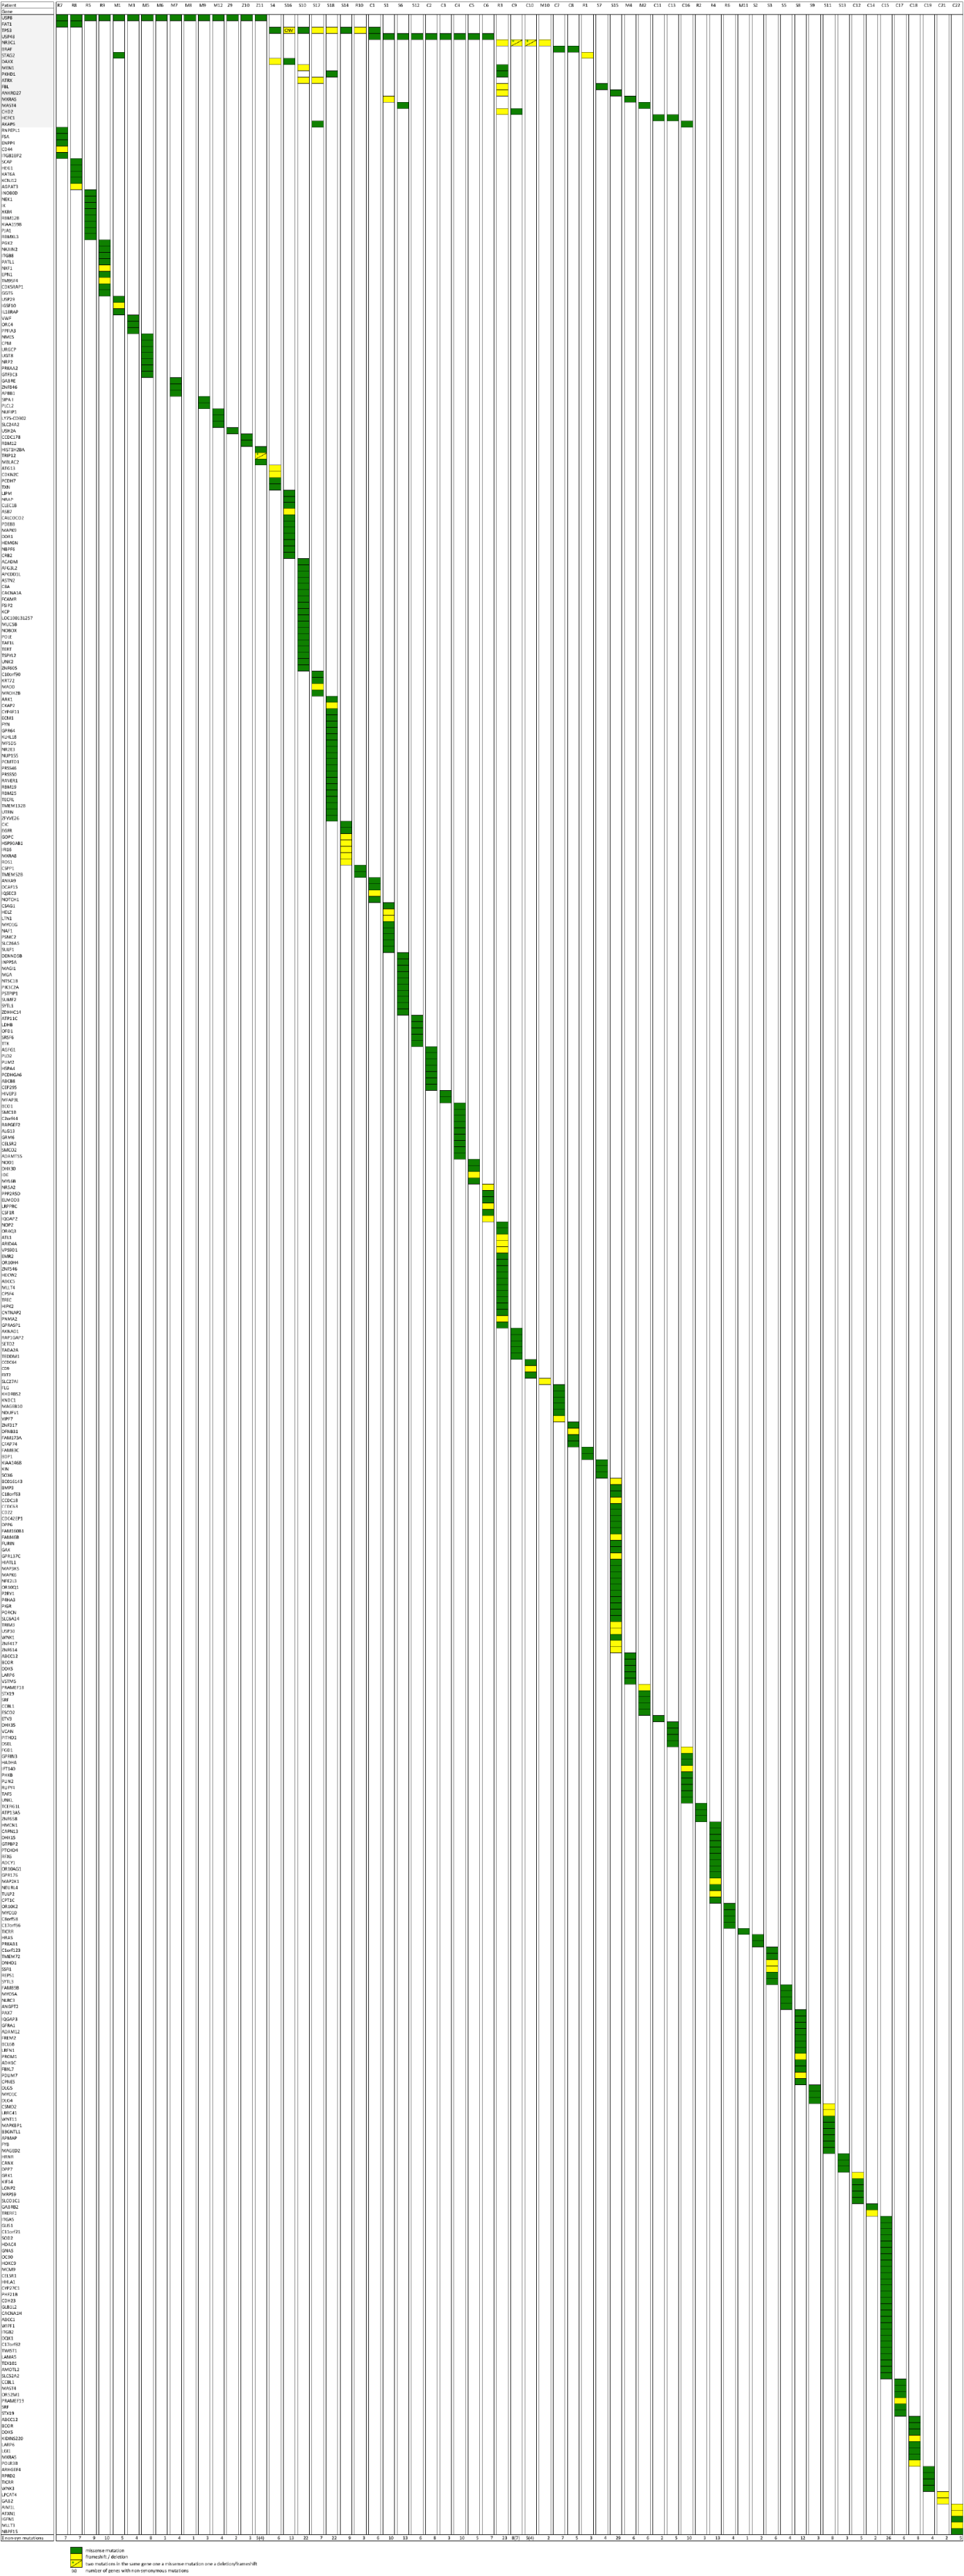

**Figure S2.** Schematic representation of all non-synonymous mutations identified by next generation sequencing until now in Cushing's disease.



**Supplementary Table S1.** See separate file.

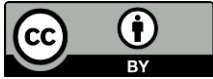

© 2019 by the authors. Licensee MDPI, Basel, Switzerland. This article is an open access article distributed under the terms and conditions of the Creative Commons Attribution (CC BY) license (<http://creativecommons.org/licenses/by/4.0/>).
