# Supplementary material for: The New Genetic Landscape of Cushing’s Disease: Deubiquitinases in the Spotlight
Source: Cancers (Basel). 2019 Nov 8;11(11):1761. doi: 10.3390/cancers11111761 (PMC6895825; doi:10.3390/cancers11111761)
Supplement: Supplementary file 1 [file cancers-11-01761-s001.zip › cancers-621823 - supplementry - final/Supplementary Table 1 final.xls]

## Sheet: ClueGO Results
Supplementary Table S1. List of all the most significantly enriched pathways due to mutated genes in CD.
GOID	GOTerm	Ontology Source	Term PValue	Term PValue Corrected with Bonferroni step down	Group PValue	Group PValue Corrected with Bonferroni step down	GOLevels	GOGroups	% Associated Genes	Nr. Genes	Associated Genes Found
GO:0000366	TGF-beta Signaling Pathway	WikiPathways_01.03.2017	9.1e-28	3.8e-25	9.1e-28	2.7e-27	[-1]	Group00	27.8195	37	[AKT1, BCAR1, CAV1, CDK1, CREBBP, EP300, ETS1, GRB2, HDAC1, ITGB4, MAP2K1, MAP2K2, MAPK1, MAPK14, MAPK8, MEF2A, MEF2C, MYC, NEDD9, PAK2, PIK3R1, PIK3R2, PML, PTK2, RAF1, RUNX2, SHC1, SNW1, SOS1, SP1, SRC, SUMO1, TGFB1, TGFBR2, TP53, TRAF6, UBE2I]
GO:0004010	MAPK signaling pathway	KEGG_01.03.2017	1.8e-29	7.6e-27	2.6e-41	1.8e-40	[-1]	Group01	19.6078	50	[AKT1, BRAF, CASP3, CRK, DAXX, EGFR, ELK1, FAS, FASLG, GRB2, HRAS, HSPB1, LAMTOR3, MAP2K1, MAP2K2, MAP3K4, MAP3K5, MAPK1, MAPK14, MAPK3, MAPK8, MAPK8IP3, MAPT, MECOM, MEF2C, MRAS, MYC, NF1, NFKB2, NTRK2, PAK1, PAK2, PDGFB, PDGFRB, PRKACA, PTPN5, RAF1, RAP1A, RAP1B, RASA1, RASGRP1, RASGRP4, RPS6KA2, RPS6KA4, SOS1, SOS2, TGFB1, TGFBR2, TP53, TRAF6]
GO:0002377	Integrated Pancreatic Cancer Pathway	WikiPathways_01.03.2017	1.7e-28	7.3e-26	2.6e-41	1.8e-40	[-1]	Group01	22.335	44	[AKT1, AR, BCL2, CASP3, CASP8, CASP9, CDC25C, CREBBP, CRK, CTNNB1, DAXX, EGFR, EP300, EZH2, FAS, FASLG, GRB2, HNF4A, IL3, MAP2K1, MAP3K4, MAP3K5, MAPK1, MAPK14, MAPK3, MAPK8, MAPT, MDM2, MYC, PAK1, PIK3CA, PML, PRKAA2, RAD51, RAF1, RAP1A, RHEB, SOS1, SP1, SRC, STAT1, STK11, TGFB1, TP53]
GO:0000382	MAPK Signaling Pathway	WikiPathways_01.03.2017	1.9e-37	8.5e-35	2.6e-41	1.8e-40	[-1]	Group01	28.8235	49	[AKT1, BRAF, CASP3, CASP8, CASP9, CRK, DAXX, EGFR, ELK1, FAS, FASLG, GRB2, HSPB1, LAMTOR3, MAP2K1, MAP2K2, MAP3K4, MAP3K5, MAPK1, MAPK14, MAPK3, MAPK8, MAPK8IP3, MAPT, MEF2C, MRAS, MYC, NF1, PAK1, PAK2, PDGFB, PDGFRB, PRKACA, PRKCD, PRKCH, PRKCZ, PTPN5, RAF1, RAP1A, RAP1B, RASA1, RASGRP1, RASGRP4, SH2D1A, SOS2, TGFB1, TGFBR2, TP53, TRAF6]
GO:0004919	Thyroid hormone signaling pathway	KEGG_01.03.2017	1.5e-20	6.1e-18	8.9e-32	3.5e-31	[-1]	Group02	25	29	[AKT1, CASP9, CREBBP, CTNNB1, EP300, HDAC1, HDAC2, HDAC3, HRAS, MAP2K1, MAP2K2, MAPK1, MAPK3, MDM2, MYC, PFKFB2, PIK3CA, PIK3CD, PIK3R1, PIK3R2, PLCE1, PLCG1, PLCG2, PRKACA, RAF1, RHEB, SRC, STAT1, TP53]
GO:0005161	Hepatitis B	KEGG_01.03.2017	6.3e-22	2.4e-19	8.9e-32	3.5e-31	[-1]	Group02	22.9167	33	[AKT1, BCL2, CASP3, CASP8, CASP9, CREBBP, ELK1, EP300, FAS, FASLG, GRB2, HRAS, MAP2K1, MAP2K2, MAPK1, MAPK3, MAPK8, MYC, PIK3CA, PIK3CD, PIK3R1, PIK3R2, PTK2B, RAF1, SRC, STAT1, STAT3, TGFB1, TLR2, TP53, YWHAB, YWHAQ, YWHAZ]
GO:0005169	Epstein-Barr virus infection	KEGG_01.03.2017	6.9e-26	2.8e-23	8.9e-32	3.5e-31	[-1]	Group02	20.7921	42	[AKT1, BCL2, CD19, CD44, CDK1, CREBBP, EP300, FCER2, HDAC1, HDAC2, HDAC4, HDAC5, HSPB1, IRAK1, MAPK14, MAPK8, MDM2, MYC, NCOR2, NFKB2, PIK3CA, PIK3CD, PIK3R1, PIK3R2, PLCG1, PLCG2, PRKACA, SNW1, SPN, STAT3, SYK, TP53, TRAF3, TRAF6, TYK2, USP7, YWHAB, YWHAE, YWHAG, YWHAH, YWHAQ, YWHAZ]
GO:0005203	Viral carcinogenesis	KEGG_01.03.2017	6.2e-22	2.4e-19	8.9e-32	3.5e-31	[-1]	Group02	18.9055	38	[CASP3, CASP8, CDK1, CREBBP, EP300, GRB2, HDAC1, HDAC2, HDAC3, HDAC4, HDAC5, HDAC6, HDAC9, HNRNPK, HRAS, MAPK1, MAPK3, MDM2, NFKB2, PIK3CA, PIK3CD, PIK3R1, PIK3R2, PRKACA, PXN, SNW1, SRC, STAT3, SYK, TP53, TRAF3, USP7, YWHAB, YWHAE, YWHAG, YWHAH, YWHAQ, YWHAZ]
GO:0005161	Hepatitis B	KEGG_01.03.2017	6.3e-22	2.4e-19	3.8e-48	3.1e-47	[-1]	Group03	22.9167	33	[AKT1, BCL2, CASP3, CASP8, CASP9, CREBBP, ELK1, EP300, FAS, FASLG, GRB2, HRAS, MAP2K1, MAP2K2, MAPK1, MAPK3, MAPK8, MYC, PIK3CA, PIK3CD, PIK3R1, PIK3R2, PTK2B, RAF1, SRC, STAT1, STAT3, TGFB1, TLR2, TP53, YWHAB, YWHAQ, YWHAZ]
GO:0001984	Integrated Breast Cancer Pathway	WikiPathways_01.03.2017	6.8e-19	2.5e-16	3.8e-48	3.1e-47	[-1]	Group03	20.1299	31	[AKT1, AR, ARAF, BCL2, BRAF, CASP3, CASP8, CASP9, CDC25A, CTNNB1, EGFR, EP300, HDAC1, HIPK2, IRS1, MAPK1, MDM2, MYC, NF1, PAK1, PIK3R2, PLK3, PML, RAD51, RAP1A, RHEB, SP1, STAT1, STK11, TGFBR2, TP53]
GO:0002377	Integrated Pancreatic Cancer Pathway	WikiPathways_01.03.2017	1.7e-28	7.3e-26	3.8e-48	3.1e-47	[-1]	Group03	22.335	44	[AKT1, AR, BCL2, CASP3, CASP8, CASP9, CDC25C, CREBBP, CRK, CTNNB1, DAXX, EGFR, EP300, EZH2, FAS, FASLG, GRB2, HNF4A, IL3, MAP2K1, MAP3K4, MAP3K5, MAPK1, MAPK14, MAPK3, MAPK8, MAPT, MDM2, MYC, PAK1, PIK3CA, PML, PRKAA2, RAD51, RAF1, RAP1A, RHEB, SOS1, SP1, SRC, STAT1, STK11, TGFB1, TP53]
GO:0003303	Rac1/Pak1/p38/MMP-2 pathway	WikiPathways_01.03.2017	3.9e-21	1.5e-18	3.8e-48	3.1e-47	[-1]	Group03	35.2941	24	[AKT1, CASP9, CRK, CTNNB1, EGFR, GRB2, HRAS, MAPK1, MAPK14, MAPK3, MAPK8, MYC, PAK1, PIK3CA, PIK3R1, PTK2, PTPN11, PXN, RAD51, RASA1, SOS1, SRC, STAT3, TP53]
GO:0000382	MAPK Signaling Pathway	WikiPathways_01.03.2017	1.9e-37	8.5e-35	3.8e-48	3.1e-47	[-1]	Group03	28.8235	49	[AKT1, BRAF, CASP3, CASP8, CASP9, CRK, DAXX, EGFR, ELK1, FAS, FASLG, GRB2, HSPB1, LAMTOR3, MAP2K1, MAP2K2, MAP3K4, MAP3K5, MAPK1, MAPK14, MAPK3, MAPK8, MAPK8IP3, MAPT, MEF2C, MRAS, MYC, NF1, PAK1, PAK2, PDGFB, PDGFRB, PRKACA, PRKCD, PRKCH, PRKCZ, PTPN5, RAF1, RAP1A, RAP1B, RASA1, RASGRP1, RASGRP4, SH2D1A, SOS2, TGFB1, TGFBR2, TP53, TRAF6]
GO:0000276	Disease	REACTOME_Pathways_01.03.2017	1.1e-20	4.5e-18	1.1e-20	2.3e-20	[-1]	Group04	8.63636	76	[ACACA, AKT1, ARAF, BRAF, BRAP, CASP9, CBL, CD19, CD36, CDC25A, CDC25C, CDK5, CREBBP, CSF2RB, CSK, CTNNB1, EGFR, EP300, FASLG, FYN, HDAC1, HDAC2, HDAC3, HDAC4, HDAC5, HDAC6, HDAC9, HRAS, HSP90AA1, IRS1, JAK2, KIT, KSR1, KSR2, MAP2K1, MAP2K2, MAPK1, MAPK3, MDM2, MYC, NCOR2, NF1, NFKB2, NMT1, PAK2, PDGFB, PDGFRB, PEBP1, PIK3CA, PIK3CD, PIK3R1, PIK3R2, PLCG1, PTPN11, RAF1, RANBP2, RAP1A, RAP1B, RASA…
GO:0000884	Diseases of glycosylation	REACTOME_Pathways_01.03.2017	1.1e-20	4.5e-18	1.1e-20	2.3e-20	[-1]	Group04	8.63636	76	[ACACA, AKT1, ARAF, BRAF, BRAP, CASP9, CBL, CD19, CD36, CDC25A, CDC25C, CDK5, CREBBP, CSF2RB, CSK, CTNNB1, EGFR, EP300, FASLG, FYN, HDAC1, HDAC2, HDAC3, HDAC4, HDAC5, HDAC6, HDAC9, HRAS, HSP90AA1, IRS1, JAK2, KIT, KSR1, KSR2, MAP2K1, MAP2K2, MAPK1, MAPK3, MDM2, MYC, NCOR2, NF1, NFKB2, NMT1, PAK2, PDGFB, PDGFRB, PEBP1, PIK3CA, PIK3CD, PIK3R1, PIK3R2, PLCG1, PTPN11, RAF1, RANBP2, RAP1A, RAP1B, RASA…
GO:0000949	Diseases associated with O-glycosylation of proteins	REACTOME_Pathways_01.03.2017	1.1e-20	4.5e-18	1.1e-20	2.3e-20	[-1]	Group04	8.63636	76	[ACACA, AKT1, ARAF, BRAF, BRAP, CASP9, CBL, CD19, CD36, CDC25A, CDC25C, CDK5, CREBBP, CSF2RB, CSK, CTNNB1, EGFR, EP300, FASLG, FYN, HDAC1, HDAC2, HDAC3, HDAC4, HDAC5, HDAC6, HDAC9, HRAS, HSP90AA1, IRS1, JAK2, KIT, KSR1, KSR2, MAP2K1, MAP2K2, MAPK1, MAPK3, MDM2, MYC, NCOR2, NF1, NFKB2, NMT1, PAK2, PDGFB, PDGFRB, PEBP1, PIK3CA, PIK3CD, PIK3R1, PIK3R2, PLCG1, PTPN11, RAF1, RANBP2, RAP1A, RAP1B, RASA…
GO:0001164	Defective B3GALTL causes Peters-plus syndrome (PpS)	REACTOME_Pathways_01.03.2017	1.1e-20	4.5e-18	1.1e-20	2.3e-20	[-1]	Group04	8.63636	76	[ACACA, AKT1, ARAF, BRAF, BRAP, CASP9, CBL, CD19, CD36, CDC25A, CDC25C, CDK5, CREBBP, CSF2RB, CSK, CTNNB1, EGFR, EP300, FASLG, FYN, HDAC1, HDAC2, HDAC3, HDAC4, HDAC5, HDAC6, HDAC9, HRAS, HSP90AA1, IRS1, JAK2, KIT, KSR1, KSR2, MAP2K1, MAP2K2, MAPK1, MAPK3, MDM2, MYC, NCOR2, NF1, NFKB2, NMT1, PAK2, PDGFB, PDGFRB, PEBP1, PIK3CA, PIK3CD, PIK3R1, PIK3R2, PLCG1, PTPN11, RAF1, RANBP2, RAP1A, RAP1B, RASA…
GO:0001169	O-linked glycosylation	REACTOME_Pathways_01.03.2017	1.1e-20	4.5e-18	1.1e-20	2.3e-20	[-1]	Group04	8.63636	76	[ACACA, AKT1, ARAF, BRAF, BRAP, CASP9, CBL, CD19, CD36, CDC25A, CDC25C, CDK5, CREBBP, CSF2RB, CSK, CTNNB1, EGFR, EP300, FASLG, FYN, HDAC1, HDAC2, HDAC3, HDAC4, HDAC5, HDAC6, HDAC9, HRAS, HSP90AA1, IRS1, JAK2, KIT, KSR1, KSR2, MAP2K1, MAP2K2, MAPK1, MAPK3, MDM2, MYC, NCOR2, NF1, NFKB2, NMT1, PAK2, PDGFB, PDGFRB, PEBP1, PIK3CA, PIK3CD, PIK3R1, PIK3R2, PLCG1, PTPN11, RAF1, RANBP2, RAP1A, RAP1B, RASA…
GO:0001170	O-glycosylation of TSR domain-containing proteins	REACTOME_Pathways_01.03.2017	1.1e-20	4.5e-18	1.1e-20	2.3e-20	[-1]	Group04	8.63636	76	[ACACA, AKT1, ARAF, BRAF, BRAP, CASP9, CBL, CD19, CD36, CDC25A, CDC25C, CDK5, CREBBP, CSF2RB, CSK, CTNNB1, EGFR, EP300, FASLG, FYN, HDAC1, HDAC2, HDAC3, HDAC4, HDAC5, HDAC6, HDAC9, HRAS, HSP90AA1, IRS1, JAK2, KIT, KSR1, KSR2, MAP2K1, MAP2K2, MAPK1, MAPK3, MDM2, MYC, NCOR2, NF1, NFKB2, NMT1, PAK2, PDGFB, PDGFRB, PEBP1, PIK3CA, PIK3CD, PIK3R1, PIK3R2, PLCG1, PTPN11, RAF1, RANBP2, RAP1A, RAP1B, RASA…
GO:0004014	Ras signaling pathway	KEGG_01.03.2017	4.7e-41	2e-38	1.9e-37	1.1e-36	[-1]	Group05	25.5507	58	[AFDN, AKT1, BRAP, CSF1R, EGFR, ELK1, ETS1, FASLG, FLT1, GRB2, GRIN1, GRIN2A, GRIN2B, HRAS, INSR, KDR, KIT, KSR1, KSR2, MAP2K1, MAP2K2, MAPK1, MAPK3, MAPK8, MRAS, NF1, PAK1, PAK2, PDGFB, PDGFRB, PIK3CA, PIK3CD, PIK3R1, PIK3R2, PLCE1, PLCG1, PLCG2, PLD2, PRKACA, PTPN11, RAF1, RALGDS, RAP1A, RAP1B, RASA1, RASGRP1, RASGRP4, RASSF1, RASSF5, RGL1, RGL2, RIN1, SHC1, SHOC2, SOS1, SOS2, TIAM1, ZAP70]
GO:0000109	Developmental Biology	REACTOME_Pathways_01.03.2017	9e-27	3.7e-24	1.9e-37	1.1e-36	[-1]	Group05	8.86792	94	[AKT1, ARAF, BRAF, BRAP, CD36, CDK5, CNTN1, CNTNAP1, CREBBP, CSF2RB, CSK, CTNNB1, DLG4, DOK1, DOK4, EGFR, EP300, EPHA4, EPHA8, EPHB3, EVL, EZH2, FYN, GRB10, GRIN1, GRIN2A, GRIN2B, GRIN2D, HDAC3, HRAS, HSP90AA1, IL2RB, IL3, IRS1, ITSN1, JAK2, JUP, KDR, KIT, KSR1, KSR2, LAMTOR3, LEP, MAP2K1, MAP2K2, MAPK1, MAPK14, MAPK3, MED28, MEF2A, MEF2B, MEF2C, MEF2D, NCAM1, NCOR2, NF1, PAK1, PAK2, PDGFB, PDGFR…
GO:0000874	L1CAM interactions	REACTOME_Pathways_01.03.2017	4.1e-32	1.7e-29	1.9e-37	1.1e-36	[-1]	Group05	13.3816	74	[ARAF, BRAF, BRAP, CDK5, CNTN1, CNTNAP1, CSF2RB, CSK, DLG4, DOK1, DOK4, EGFR, EPHA4, EPHA8, EPHB3, EVL, FYN, GRB10, GRIN1, GRIN2A, GRIN2B, GRIN2D, HRAS, HSP90AA1, IL2RB, IL3, IRS1, ITSN1, JAK2, KDR, KIT, KSR1, KSR2, LAMTOR3, MAP2K1, MAP2K2, MAPK1, MAPK3, NCAM1, NF1, PAK1, PAK2, PDGFB, PDGFRB, PEBP1, PIK3CA, PIK3CD, PIK3R1, PIK3R2, PLCG1, PRKACA, PRKCQ, PTK2, PTPN11, PTPRA, PTPRC, RAF1, RAP1A, RAP…
GO:0001022	Axon guidance	REACTOME_Pathways_01.03.2017	4.1e-32	1.7e-29	1.9e-37	1.1e-36	[-1]	Group05	13.3816	74	[ARAF, BRAF, BRAP, CDK5, CNTN1, CNTNAP1, CSF2RB, CSK, DLG4, DOK1, DOK4, EGFR, EPHA4, EPHA8, EPHB3, EVL, FYN, GRB10, GRIN1, GRIN2A, GRIN2B, GRIN2D, HRAS, HSP90AA1, IL2RB, IL3, IRS1, ITSN1, JAK2, KDR, KIT, KSR1, KSR2, LAMTOR3, MAP2K1, MAP2K2, MAPK1, MAPK3, NCAM1, NF1, PAK1, PAK2, PDGFB, PDGFRB, PEBP1, PIK3CA, PIK3CD, PIK3R1, PIK3R2, PLCG1, PRKACA, PRKCQ, PTK2, PTPN11, PTPRA, PTPRC, RAF1, RAP1A, RAP…
GO:0001071	Recycling pathway of L1	REACTOME_Pathways_01.03.2017	4.1e-32	1.7e-29	1.9e-37	1.1e-36	[-1]	Group05	13.3816	74	[ARAF, BRAF, BRAP, CDK5, CNTN1, CNTNAP1, CSF2RB, CSK, DLG4, DOK1, DOK4, EGFR, EPHA4, EPHA8, EPHB3, EVL, FYN, GRB10, GRIN1, GRIN2A, GRIN2B, GRIN2D, HRAS, HSP90AA1, IL2RB, IL3, IRS1, ITSN1, JAK2, KDR, KIT, KSR1, KSR2, LAMTOR3, MAP2K1, MAP2K2, MAPK1, MAPK3, NCAM1, NF1, PAK1, PAK2, PDGFB, PDGFRB, PEBP1, PIK3CA, PIK3CD, PIK3R1, PIK3R2, PLCG1, PRKACA, PRKCQ, PTK2, PTPN11, PTPRA, PTPRC, RAF1, RAP1A, RAP…
GO:0001494	Keratinization	REACTOME_Pathways_01.03.2017	9e-27	3.7e-24	1.9e-37	1.1e-36	[-1]	Group05	8.86792	94	[AKT1, ARAF, BRAF, BRAP, CD36, CDK5, CNTN1, CNTNAP1, CREBBP, CSF2RB, CSK, CTNNB1, DLG4, DOK1, DOK4, EGFR, EP300, EPHA4, EPHA8, EPHB3, EVL, EZH2, FYN, GRB10, GRIN1, GRIN2A, GRIN2B, GRIN2D, HDAC3, HRAS, HSP90AA1, IL2RB, IL3, IRS1, ITSN1, JAK2, JUP, KDR, KIT, KSR1, KSR2, LAMTOR3, LEP, MAP2K1, MAP2K2, MAPK1, MAPK14, MAPK3, MED28, MEF2A, MEF2B, MEF2C, MEF2D, NCAM1, NCOR2, NF1, PAK1, PAK2, PDGFB, PDGFR…
GO:0001505	Formation of the cornified envelope	REACTOME_Pathways_01.03.2017	9e-27	3.7e-24	1.9e-37	1.1e-36	[-1]	Group05	8.86792	94	[AKT1, ARAF, BRAF, BRAP, CD36, CDK5, CNTN1, CNTNAP1, CREBBP, CSF2RB, CSK, CTNNB1, DLG4, DOK1, DOK4, EGFR, EP300, EPHA4, EPHA8, EPHB3, EVL, EZH2, FYN, GRB10, GRIN1, GRIN2A, GRIN2B, GRIN2D, HDAC3, HRAS, HSP90AA1, IL2RB, IL3, IRS1, ITSN1, JAK2, JUP, KDR, KIT, KSR1, KSR2, LAMTOR3, LEP, MAP2K1, MAP2K2, MAPK1, MAPK14, MAPK3, MED28, MEF2A, MEF2B, MEF2C, MEF2D, NCAM1, NCOR2, NF1, PAK1, PAK2, PDGFB, PDGFR…
GO:0004012	ErbB signaling pathway	KEGG_01.03.2017	5.7e-26	2.3e-23	1.7e-62	1.5e-61	[-1]	Group06	34.8837	30	[AKT1, ARAF, BRAF, CBL, CBLB, CRK, EGFR, ELK1, GRB2, HRAS, MAP2K1, MAP2K2, MAPK1, MAPK3, MAPK8, MYC, PAK1, PAK2, PIK3CA, PIK3CD, PIK3R1, PIK3R2, PLCG1, PLCG2, PTK2, RAF1, SHC1, SOS1, SOS2, SRC]
GO:0004014	Ras signaling pathway	KEGG_01.03.2017	4.7e-41	2e-38	1.7e-62	1.5e-61	[-1]	Group06	25.5507	58	[AFDN, AKT1, BRAP, CSF1R, EGFR, ELK1, ETS1, FASLG, FLT1, GRB2, GRIN1, GRIN2A, GRIN2B, HRAS, INSR, KDR, KIT, KSR1, KSR2, MAP2K1, MAP2K2, MAPK1, MAPK3, MAPK8, MRAS, NF1, PAK1, PAK2, PDGFB, PDGFRB, PIK3CA, PIK3CD, PIK3R1, PIK3R2, PLCE1, PLCG1, PLCG2, PLD2, PRKACA, PTPN11, RAF1, RALGDS, RAP1A, RAP1B, RASA1, RASGRP1, RASGRP4, RASSF1, RASSF5, RGL1, RGL2, RIN1, SHC1, SHOC2, SOS1, SOS2, TIAM1, ZAP70]
GO:0004015	Rap1 signaling pathway	KEGG_01.03.2017	3e-27	1.2e-24	1.7e-62	1.5e-61	[-1]	Group06	20.9524	44	[AFDN, AKT1, BCAR1, BRAF, CRK, CSF1R, CTNNB1, EGFR, FLT1, FYB, GRIN1, GRIN2A, GRIN2B, HRAS, INSR, KDR, KIT, LCP2, MAP2K1, MAP2K2, MAPK1, MAPK14, MAPK3, MRAS, PDGFB, PDGFRB, PIK3CA, PIK3CD, PIK3R1, PIK3R2, PLCE1, PLCG1, PRKCI, PRKCZ, RAF1, RALGDS, RAP1A, RAP1B, RAP1GAP, RAPGEF1, RASSF5, SKAP1, SRC, TIAM1]
GO:0004072	Phospholipase D signaling pathway	KEGG_01.03.2017	6.5e-24	2.6e-21	1.7e-62	1.5e-61	[-1]	Group06	23.9726	35	[AGTR1, AKT1, DGKZ, EGFR, FYN, GRB2, HRAS, INSR, KIT, MAP2K1, MAP2K2, MAPK1, MAPK3, MRAS, PDGFB, PDGFRB, PIK3CA, PIK3CD, PIK3CG, PIK3R1, PIK3R2, PLCG1, PLCG2, PLD2, PTK2B, PTPN11, RAF1, RALGDS, RHEB, SHC1, SOS1, SOS2, SPHK1, SPHK2, SYK]
GO:0004510	Focal adhesion	KEGG_01.03.2017	4.3e-23	1.7e-20	1.7e-62	1.5e-61	[-1]	Group06	19.598	39	[AKT1, BCAR1, BCL2, BRAF, CAV1, CRK, CTNNB1, EGFR, ELK1, FLT1, FYN, GRB2, HRAS, ITGB4, KDR, MAP2K1, MAPK1, MAPK3, MAPK8, PAK1, PAK2, PARVA, PDGFB, PDGFRB, PIK3CA, PIK3CD, PIK3R1, PIK3R2, PTK2, PXN, RAF1, RAP1A, RAP1B, RAPGEF1, SHC1, SOS1, SOS2, SRC, VAV1]
GO:0005211	Renal cell carcinoma	KEGG_01.03.2017	2.3e-27	9.5e-25	1.7e-62	1.5e-61	[-1]	Group06	43.0769	28	[AKT1, ARAF, BRAF, CREBBP, CRK, EP300, ETS1, GRB2, HRAS, MAP2K1, MAP2K2, MAPK1, MAPK3, PAK1, PAK2, PDGFB, PIK3CA, PIK3CD, PIK3R1, PIK3R2, PTPN11, RAF1, RAP1A, RAP1B, RAPGEF1, SOS1, SOS2, TGFB1]
GO:0005214	Glioma	KEGG_01.03.2017	7.3e-22	2.8e-19	1.7e-62	1.5e-61	[-1]	Group06	37.5	24	[AKT1, ARAF, BRAF, EGFR, GRB2, HRAS, MAP2K1, MAP2K2, MAPK1, MAPK3, MDM2, PDGFB, PDGFRB, PIK3CA, PIK3CD, PIK3R1, PIK3R2, PLCG1, PLCG2, RAF1, SHC1, SOS1, SOS2, TP53]
GO:0005231	Choline metabolism in cancer	KEGG_01.03.2017	2.8e-20	1.1e-17	1.7e-62	1.5e-61	[-1]	Group06	27.2727	27	[AKT1, DGKZ, EGFR, GRB2, HRAS, MAP2K1, MAP2K2, MAPK1, MAPK3, MAPK8, PDGFB, PDGFRB, PIK3CA, PIK3CD, PIK3R1, PIK3R2, PLCG1, PLD2, RAF1, RALGDS, RHEB, SOS1, SOS2, SP1, WAS, WASF1, WASF2]
GO:0000874	L1CAM interactions	REACTOME_Pathways_01.03.2017	4.1e-32	1.7e-29	1.7e-62	1.5e-61	[-1]	Group06	13.3816	74	[ARAF, BRAF, BRAP, CDK5, CNTN1, CNTNAP1, CSF2RB, CSK, DLG4, DOK1, DOK4, EGFR, EPHA4, EPHA8, EPHB3, EVL, FYN, GRB10, GRIN1, GRIN2A, GRIN2B, GRIN2D, HRAS, HSP90AA1, IL2RB, IL3, IRS1, ITSN1, JAK2, KDR, KIT, KSR1, KSR2, LAMTOR3, MAP2K1, MAP2K2, MAPK1, MAPK3, NCAM1, NF1, PAK1, PAK2, PDGFB, PDGFRB, PEBP1, PIK3CA, PIK3CD, PIK3R1, PIK3R2, PLCG1, PRKACA, PRKCQ, PTK2, PTPN11, PTPRA, PTPRC, RAF1, RAP1A, RAP…
GO:0001022	Axon guidance	REACTOME_Pathways_01.03.2017	4.1e-32	1.7e-29	1.7e-62	1.5e-61	[-1]	Group06	13.3816	74	[ARAF, BRAF, BRAP, CDK5, CNTN1, CNTNAP1, CSF2RB, CSK, DLG4, DOK1, DOK4, EGFR, EPHA4, EPHA8, EPHB3, EVL, FYN, GRB10, GRIN1, GRIN2A, GRIN2B, GRIN2D, HRAS, HSP90AA1, IL2RB, IL3, IRS1, ITSN1, JAK2, KDR, KIT, KSR1, KSR2, LAMTOR3, MAP2K1, MAP2K2, MAPK1, MAPK3, NCAM1, NF1, PAK1, PAK2, PDGFB, PDGFRB, PEBP1, PIK3CA, PIK3CD, PIK3R1, PIK3R2, PLCG1, PRKACA, PRKCQ, PTK2, PTPN11, PTPRA, PTPRC, RAF1, RAP1A, RAP…
GO:0001071	Recycling pathway of L1	REACTOME_Pathways_01.03.2017	4.1e-32	1.7e-29	1.7e-62	1.5e-61	[-1]	Group06	13.3816	74	[ARAF, BRAF, BRAP, CDK5, CNTN1, CNTNAP1, CSF2RB, CSK, DLG4, DOK1, DOK4, EGFR, EPHA4, EPHA8, EPHB3, EVL, FYN, GRB10, GRIN1, GRIN2A, GRIN2B, GRIN2D, HRAS, HSP90AA1, IL2RB, IL3, IRS1, ITSN1, JAK2, KDR, KIT, KSR1, KSR2, LAMTOR3, MAP2K1, MAP2K2, MAPK1, MAPK3, NCAM1, NF1, PAK1, PAK2, PDGFB, PDGFRB, PEBP1, PIK3CA, PIK3CD, PIK3R1, PIK3R2, PLCG1, PRKACA, PRKCQ, PTK2, PTPN11, PTPRA, PTPRC, RAF1, RAP1A, RAP…
GO:0000002	Hemostasis	REACTOME_Pathways_01.03.2017	4.1e-20	1.5e-17	4.1e-20	4.1e-20	[-1]	Group07	7.54717	88	[AKT1, BCAR1, CAV1, CBX5, CD2, CD36, CD44, CD48, CD55, CDK1, CDK5, CENPC, CREBBP, CRK, CSF2RB, CSK, CTNNB1, DGKZ, EP300, EVL, F10, FYN, GP6, HABP4, HDAC1, HDAC2, HDAC3, HRAS, HSP90AA1, IL2RB, IL3, ITPR1, JAK2, LCP2, MAG, MAPK1, MAPK14, MAPK3, PDGFB, PECAM1, PIK3CA, PIK3CD, PIK3CG, PIK3R1, PIK3R2, PLAUR, PLCG1, PLCG2, PRKAA2, PRKAB1, PRKACA, PRKAG1, PRKAG2, PRKCD, PRKCE, PRKCH, PRKCQ, PRKCZ, PTK2,…
GO:0000167	Translocation of GLUT4 to the plasma membrane	REACTOME_Pathways_01.03.2017	4.1e-20	1.5e-17	4.1e-20	4.1e-20	[-1]	Group07	7.54717	88	[AKT1, BCAR1, CAV1, CBX5, CD2, CD36, CD44, CD48, CD55, CDK1, CDK5, CENPC, CREBBP, CRK, CSF2RB, CSK, CTNNB1, DGKZ, EP300, EVL, F10, FYN, GP6, HABP4, HDAC1, HDAC2, HDAC3, HRAS, HSP90AA1, IL2RB, IL3, ITPR1, JAK2, LCP2, MAG, MAPK1, MAPK14, MAPK3, PDGFB, PECAM1, PIK3CA, PIK3CD, PIK3CG, PIK3R1, PIK3R2, PLAUR, PLCG1, PLCG2, PRKAA2, PRKAB1, PRKACA, PRKAG1, PRKAG2, PRKCD, PRKCE, PRKCH, PRKCQ, PRKCZ, PTK2,…
GO:0000220	Gap junction trafficking and regulation	REACTOME_Pathways_01.03.2017	4.1e-20	1.5e-17	4.1e-20	4.1e-20	[-1]	Group07	7.54717	88	[AKT1, BCAR1, CAV1, CBX5, CD2, CD36, CD44, CD48, CD55, CDK1, CDK5, CENPC, CREBBP, CRK, CSF2RB, CSK, CTNNB1, DGKZ, EP300, EVL, F10, FYN, GP6, HABP4, HDAC1, HDAC2, HDAC3, HRAS, HSP90AA1, IL2RB, IL3, ITPR1, JAK2, LCP2, MAG, MAPK1, MAPK14, MAPK3, PDGFB, PECAM1, PIK3CA, PIK3CD, PIK3CG, PIK3R1, PIK3R2, PLAUR, PLCG1, PLCG2, PRKAA2, PRKAB1, PRKACA, PRKAG1, PRKAG2, PRKCD, PRKCE, PRKCH, PRKCQ, PRKCZ, PTK2,…
GO:0000486	Gap junction trafficking	REACTOME_Pathways_01.03.2017	4.1e-20	1.5e-17	4.1e-20	4.1e-20	[-1]	Group07	7.54717	88	[AKT1, BCAR1, CAV1, CBX5, CD2, CD36, CD44, CD48, CD55, CDK1, CDK5, CENPC, CREBBP, CRK, CSF2RB, CSK, CTNNB1, DGKZ, EP300, EVL, F10, FYN, GP6, HABP4, HDAC1, HDAC2, HDAC3, HRAS, HSP90AA1, IL2RB, IL3, ITPR1, JAK2, LCP2, MAG, MAPK1, MAPK14, MAPK3, PDGFB, PECAM1, PIK3CA, PIK3CD, PIK3CG, PIK3R1, PIK3R2, PLAUR, PLCG1, PLCG2, PRKAA2, PRKAB1, PRKACA, PRKAG1, PRKAG2, PRKCD, PRKCE, PRKCH, PRKCQ, PRKCZ, PTK2,…
GO:0000487	Microtubule-dependent trafficking of connexons from Golgi to the plasma membrane	REACTOME_Pathways_01.03.2017	4.1e-20	1.5e-17	4.1e-20	4.1e-20	[-1]	Group07	7.54717	88	[AKT1, BCAR1, CAV1, CBX5, CD2, CD36, CD44, CD48, CD55, CDK1, CDK5, CENPC, CREBBP, CRK, CSF2RB, CSK, CTNNB1, DGKZ, EP300, EVL, F10, FYN, GP6, HABP4, HDAC1, HDAC2, HDAC3, HRAS, HSP90AA1, IL2RB, IL3, ITPR1, JAK2, LCP2, MAG, MAPK1, MAPK14, MAPK3, PDGFB, PECAM1, PIK3CA, PIK3CD, PIK3CG, PIK3R1, PIK3R2, PLAUR, PLCG1, PLCG2, PRKAA2, PRKAB1, PRKACA, PRKAG1, PRKAG2, PRKCD, PRKCE, PRKCH, PRKCQ, PRKCZ, PTK2,…
GO:0000488	Gap junction assembly	REACTOME_Pathways_01.03.2017	4.1e-20	1.5e-17	4.1e-20	4.1e-20	[-1]	Group07	7.54717	88	[AKT1, BCAR1, CAV1, CBX5, CD2, CD36, CD44, CD48, CD55, CDK1, CDK5, CENPC, CREBBP, CRK, CSF2RB, CSK, CTNNB1, DGKZ, EP300, EVL, F10, FYN, GP6, HABP4, HDAC1, HDAC2, HDAC3, HRAS, HSP90AA1, IL2RB, IL3, ITPR1, JAK2, LCP2, MAG, MAPK1, MAPK14, MAPK3, PDGFB, PECAM1, PIK3CA, PIK3CD, PIK3CG, PIK3R1, PIK3R2, PLAUR, PLCG1, PLCG2, PRKAA2, PRKAB1, PRKACA, PRKAG1, PRKAG2, PRKCD, PRKCE, PRKCH, PRKCQ, PRKCZ, PTK2,…
GO:0000489	Transport of connexons to the plasma membrane	REACTOME_Pathways_01.03.2017	4.1e-20	1.5e-17	4.1e-20	4.1e-20	[-1]	Group07	7.54717	88	[AKT1, BCAR1, CAV1, CBX5, CD2, CD36, CD44, CD48, CD55, CDK1, CDK5, CENPC, CREBBP, CRK, CSF2RB, CSK, CTNNB1, DGKZ, EP300, EVL, F10, FYN, GP6, HABP4, HDAC1, HDAC2, HDAC3, HRAS, HSP90AA1, IL2RB, IL3, ITPR1, JAK2, LCP2, MAG, MAPK1, MAPK14, MAPK3, PDGFB, PECAM1, PIK3CA, PIK3CD, PIK3CG, PIK3R1, PIK3R2, PLAUR, PLCG1, PLCG2, PRKAA2, PRKAB1, PRKACA, PRKAG1, PRKAG2, PRKCD, PRKCE, PRKCH, PRKCQ, PRKCZ, PTK2,…
GO:0000565	ER to Golgi Anterograde Transport	REACTOME_Pathways_01.03.2017	4.1e-20	1.5e-17	4.1e-20	4.1e-20	[-1]	Group07	7.54717	88	[AKT1, BCAR1, CAV1, CBX5, CD2, CD36, CD44, CD48, CD55, CDK1, CDK5, CENPC, CREBBP, CRK, CSF2RB, CSK, CTNNB1, DGKZ, EP300, EVL, F10, FYN, GP6, HABP4, HDAC1, HDAC2, HDAC3, HRAS, HSP90AA1, IL2RB, IL3, ITPR1, JAK2, LCP2, MAG, MAPK1, MAPK14, MAPK3, PDGFB, PECAM1, PIK3CA, PIK3CD, PIK3CG, PIK3R1, PIK3R2, PLAUR, PLCG1, PLCG2, PRKAA2, PRKAB1, PRKACA, PRKAG1, PRKAG2, PRKCD, PRKCE, PRKCH, PRKCQ, PRKCZ, PTK2,…
GO:0000660	MHC class II antigen presentation	REACTOME_Pathways_01.03.2017	4.1e-20	1.5e-17	4.1e-20	4.1e-20	[-1]	Group07	7.54717	88	[AKT1, BCAR1, CAV1, CBX5, CD2, CD36, CD44, CD48, CD55, CDK1, CDK5, CENPC, CREBBP, CRK, CSF2RB, CSK, CTNNB1, DGKZ, EP300, EVL, F10, FYN, GP6, HABP4, HDAC1, HDAC2, HDAC3, HRAS, HSP90AA1, IL2RB, IL3, ITPR1, JAK2, LCP2, MAG, MAPK1, MAPK14, MAPK3, PDGFB, PECAM1, PIK3CA, PIK3CD, PIK3CG, PIK3R1, PIK3R2, PLAUR, PLCG1, PLCG2, PRKAA2, PRKAB1, PRKACA, PRKAG1, PRKAG2, PRKCD, PRKCE, PRKCH, PRKCQ, PRKCZ, PTK2,…
GO:0000727	Resolution of Sister Chromatid Cohesion	REACTOME_Pathways_01.03.2017	4.1e-20	1.5e-17	4.1e-20	4.1e-20	[-1]	Group07	7.54717	88	[AKT1, BCAR1, CAV1, CBX5, CD2, CD36, CD44, CD48, CD55, CDK1, CDK5, CENPC, CREBBP, CRK, CSF2RB, CSK, CTNNB1, DGKZ, EP300, EVL, F10, FYN, GP6, HABP4, HDAC1, HDAC2, HDAC3, HRAS, HSP90AA1, IL2RB, IL3, ITPR1, JAK2, LCP2, MAG, MAPK1, MAPK14, MAPK3, PDGFB, PECAM1, PIK3CA, PIK3CD, PIK3CG, PIK3R1, PIK3R2, PLAUR, PLCG1, PLCG2, PRKAA2, PRKAB1, PRKACA, PRKAG1, PRKAG2, PRKCD, PRKCE, PRKCH, PRKCQ, PRKCZ, PTK2,…
GO:0000895	Recruitment of mitotic centrosome proteins and complexes	REACTOME_Pathways_01.03.2017	4.1e-20	1.5e-17	4.1e-20	4.1e-20	[-1]	Group07	7.54717	88	[AKT1, BCAR1, CAV1, CBX5, CD2, CD36, CD44, CD48, CD55, CDK1, CDK5, CENPC, CREBBP, CRK, CSF2RB, CSK, CTNNB1, DGKZ, EP300, EVL, F10, FYN, GP6, HABP4, HDAC1, HDAC2, HDAC3, HRAS, HSP90AA1, IL2RB, IL3, ITPR1, JAK2, LCP2, MAG, MAPK1, MAPK14, MAPK3, PDGFB, PECAM1, PIK3CA, PIK3CD, PIK3CG, PIK3R1, PIK3R2, PLAUR, PLCG1, PLCG2, PRKAA2, PRKAB1, PRKACA, PRKAG1, PRKAG2, PRKCD, PRKCE, PRKCH, PRKCQ, PRKCZ, PTK2,…
GO:0000897	Centrosome maturation	REACTOME_Pathways_01.03.2017	4.1e-20	1.5e-17	4.1e-20	4.1e-20	[-1]	Group07	7.54717	88	[AKT1, BCAR1, CAV1, CBX5, CD2, CD36, CD44, CD48, CD55, CDK1, CDK5, CENPC, CREBBP, CRK, CSF2RB, CSK, CTNNB1, DGKZ, EP300, EVL, F10, FYN, GP6, HABP4, HDAC1, HDAC2, HDAC3, HRAS, HSP90AA1, IL2RB, IL3, ITPR1, JAK2, LCP2, MAG, MAPK1, MAPK14, MAPK3, PDGFB, PECAM1, PIK3CA, PIK3CD, PIK3CG, PIK3R1, PIK3R2, PLAUR, PLCG1, PLCG2, PRKAA2, PRKAB1, PRKACA, PRKAG1, PRKAG2, PRKCD, PRKCE, PRKCH, PRKCQ, PRKCZ, PTK2,…
GO:0000898	Recruitment of NuMA to mitotic centrosomes	REACTOME_Pathways_01.03.2017	4.1e-20	1.5e-17	4.1e-20	4.1e-20	[-1]	Group07	7.54717	88	[AKT1, BCAR1, CAV1, CBX5, CD2, CD36, CD44, CD48, CD55, CDK1, CDK5, CENPC, CREBBP, CRK, CSF2RB, CSK, CTNNB1, DGKZ, EP300, EVL, F10, FYN, GP6, HABP4, HDAC1, HDAC2, HDAC3, HRAS, HSP90AA1, IL2RB, IL3, ITPR1, JAK2, LCP2, MAG, MAPK1, MAPK14, MAPK3, PDGFB, PECAM1, PIK3CA, PIK3CD, PIK3CG, PIK3R1, PIK3R2, PLAUR, PLCG1, PLCG2, PRKAA2, PRKAB1, PRKACA, PRKAG1, PRKAG2, PRKCD, PRKCE, PRKCH, PRKCQ, PRKCZ, PTK2,…
GO:0000936	Cooperation of Prefoldin and TriC/CCT in actin and tubulin folding	REACTOME_Pathways_01.03.2017	4.1e-20	1.5e-17	4.1e-20	4.1e-20	[-1]	Group07	7.54717	88	[AKT1, BCAR1, CAV1, CBX5, CD2, CD36, CD44, CD48, CD55, CDK1, CDK5, CENPC, CREBBP, CRK, CSF2RB, CSK, CTNNB1, DGKZ, EP300, EVL, F10, FYN, GP6, HABP4, HDAC1, HDAC2, HDAC3, HRAS, HSP90AA1, IL2RB, IL3, ITPR1, JAK2, LCP2, MAG, MAPK1, MAPK14, MAPK3, PDGFB, PECAM1, PIK3CA, PIK3CD, PIK3CG, PIK3R1, PIK3R2, PLAUR, PLCG1, PLCG2, PRKAA2, PRKAB1, PRKACA, PRKAG1, PRKAG2, PRKCD, PRKCE, PRKCH, PRKCQ, PRKCZ, PTK2,…
GO:0000937	Formation of tubulin folding intermediates by CCT/TriC	REACTOME_Pathways_01.03.2017	4.1e-20	1.5e-17	4.1e-20	4.1e-20	[-1]	Group07	7.54717	88	[AKT1, BCAR1, CAV1, CBX5, CD2, CD36, CD44, CD48, CD55, CDK1, CDK5, CENPC, CREBBP, CRK, CSF2RB, CSK, CTNNB1, DGKZ, EP300, EVL, F10, FYN, GP6, HABP4, HDAC1, HDAC2, HDAC3, HRAS, HSP90AA1, IL2RB, IL3, ITPR1, JAK2, LCP2, MAG, MAPK1, MAPK14, MAPK3, PDGFB, PECAM1, PIK3CA, PIK3CD, PIK3CG, PIK3R1, PIK3R2, PLAUR, PLCG1, PLCG2, PRKAA2, PRKAB1, PRKACA, PRKAG1, PRKAG2, PRKCD, PRKCE, PRKCH, PRKCQ, PRKCZ, PTK2,…
GO:0000938	Post-chaperonin tubulin folding pathway	REACTOME_Pathways_01.03.2017	4.1e-20	1.5e-17	4.1e-20	4.1e-20	[-1]	Group07	7.54717	88	[AKT1, BCAR1, CAV1, CBX5, CD2, CD36, CD44, CD48, CD55, CDK1, CDK5, CENPC, CREBBP, CRK, CSF2RB, CSK, CTNNB1, DGKZ, EP300, EVL, F10, FYN, GP6, HABP4, HDAC1, HDAC2, HDAC3, HRAS, HSP90AA1, IL2RB, IL3, ITPR1, JAK2, LCP2, MAG, MAPK1, MAPK14, MAPK3, PDGFB, PECAM1, PIK3CA, PIK3CD, PIK3CG, PIK3R1, PIK3R2, PLAUR, PLCG1, PLCG2, PRKAA2, PRKAB1, PRKACA, PRKAG1, PRKAG2, PRKCD, PRKCE, PRKCH, PRKCQ, PRKCZ, PTK2,…
GO:0000941	Chaperonin-mediated protein folding	REACTOME_Pathways_01.03.2017	4.1e-20	1.5e-17	4.1e-20	4.1e-20	[-1]	Group07	7.54717	88	[AKT1, BCAR1, CAV1, CBX5, CD2, CD36, CD44, CD48, CD55, CDK1, CDK5, CENPC, CREBBP, CRK, CSF2RB, CSK, CTNNB1, DGKZ, EP300, EVL, F10, FYN, GP6, HABP4, HDAC1, HDAC2, HDAC3, HRAS, HSP90AA1, IL2RB, IL3, ITPR1, JAK2, LCP2, MAG, MAPK1, MAPK14, MAPK3, PDGFB, PECAM1, PIK3CA, PIK3CD, PIK3CG, PIK3R1, PIK3R2, PLAUR, PLCG1, PLCG2, PRKAA2, PRKAB1, PRKACA, PRKAG1, PRKAG2, PRKCD, PRKCE, PRKCH, PRKCQ, PRKCZ, PTK2,…
GO:0000952	Protein folding	REACTOME_Pathways_01.03.2017	4.1e-20	1.5e-17	4.1e-20	4.1e-20	[-1]	Group07	7.54717	88	[AKT1, BCAR1, CAV1, CBX5, CD2, CD36, CD44, CD48, CD55, CDK1, CDK5, CENPC, CREBBP, CRK, CSF2RB, CSK, CTNNB1, DGKZ, EP300, EVL, F10, FYN, GP6, HABP4, HDAC1, HDAC2, HDAC3, HRAS, HSP90AA1, IL2RB, IL3, ITPR1, JAK2, LCP2, MAG, MAPK1, MAPK14, MAPK3, PDGFB, PECAM1, PIK3CA, PIK3CD, PIK3CG, PIK3R1, PIK3R2, PLAUR, PLCG1, PLCG2, PRKAA2, PRKAB1, PRKACA, PRKAG1, PRKAG2, PRKCD, PRKCE, PRKCH, PRKCQ, PRKCZ, PTK2,…
GO:0001298	RHO GTPases activate IQGAPs	REACTOME_Pathways_01.03.2017	4.1e-20	1.5e-17	4.1e-20	4.1e-20	[-1]	Group07	7.54717	88	[AKT1, BCAR1, CAV1, CBX5, CD2, CD36, CD44, CD48, CD55, CDK1, CDK5, CENPC, CREBBP, CRK, CSF2RB, CSK, CTNNB1, DGKZ, EP300, EVL, F10, FYN, GP6, HABP4, HDAC1, HDAC2, HDAC3, HRAS, HSP90AA1, IL2RB, IL3, ITPR1, JAK2, LCP2, MAG, MAPK1, MAPK14, MAPK3, PDGFB, PECAM1, PIK3CA, PIK3CD, PIK3CG, PIK3R1, PIK3R2, PLAUR, PLCG1, PLCG2, PRKAA2, PRKAB1, PRKACA, PRKAG1, PRKAG2, PRKCD, PRKCE, PRKCH, PRKCQ, PRKCZ, PTK2,…
GO:0001369	RHO GTPases Activate Formins	REACTOME_Pathways_01.03.2017	4.1e-20	1.5e-17	4.1e-20	4.1e-20	[-1]	Group07	7.54717	88	[AKT1, BCAR1, CAV1, CBX5, CD2, CD36, CD44, CD48, CD55, CDK1, CDK5, CENPC, CREBBP, CRK, CSF2RB, CSK, CTNNB1, DGKZ, EP300, EVL, F10, FYN, GP6, HABP4, HDAC1, HDAC2, HDAC3, HRAS, HSP90AA1, IL2RB, IL3, ITPR1, JAK2, LCP2, MAG, MAPK1, MAPK14, MAPK3, PDGFB, PECAM1, PIK3CA, PIK3CD, PIK3CG, PIK3R1, PIK3R2, PLAUR, PLCG1, PLCG2, PRKAA2, PRKAB1, PRKACA, PRKAG1, PRKAG2, PRKCD, PRKCE, PRKCH, PRKCQ, PRKCZ, PTK2,…
GO:0001504	COPI-mediated anterograde transport	REACTOME_Pathways_01.03.2017	4.1e-20	1.5e-17	4.1e-20	4.1e-20	[-1]	Group07	7.54717	88	[AKT1, BCAR1, CAV1, CBX5, CD2, CD36, CD44, CD48, CD55, CDK1, CDK5, CENPC, CREBBP, CRK, CSF2RB, CSK, CTNNB1, DGKZ, EP300, EVL, F10, FYN, GP6, HABP4, HDAC1, HDAC2, HDAC3, HRAS, HSP90AA1, IL2RB, IL3, ITPR1, JAK2, LCP2, MAG, MAPK1, MAPK14, MAPK3, PDGFB, PECAM1, PIK3CA, PIK3CD, PIK3CG, PIK3R1, PIK3R2, PLAUR, PLCG1, PLCG2, PRKAA2, PRKAB1, PRKACA, PRKAG1, PRKAG2, PRKCD, PRKCE, PRKCH, PRKCQ, PRKCZ, PTK2,…
GO:0001508	COPI-independent Golgi-to-ER retrograde traffic	REACTOME_Pathways_01.03.2017	4.1e-20	1.5e-17	4.1e-20	4.1e-20	[-1]	Group07	7.54717	88	[AKT1, BCAR1, CAV1, CBX5, CD2, CD36, CD44, CD48, CD55, CDK1, CDK5, CENPC, CREBBP, CRK, CSF2RB, CSK, CTNNB1, DGKZ, EP300, EVL, F10, FYN, GP6, HABP4, HDAC1, HDAC2, HDAC3, HRAS, HSP90AA1, IL2RB, IL3, ITPR1, JAK2, LCP2, MAG, MAPK1, MAPK14, MAPK3, PDGFB, PECAM1, PIK3CA, PIK3CD, PIK3CG, PIK3R1, PIK3R2, PLAUR, PLCG1, PLCG2, PRKAA2, PRKAB1, PRKACA, PRKAG1, PRKAG2, PRKCD, PRKCE, PRKCH, PRKCQ, PRKCZ, PTK2,…
GO:0001522	Mitotic Prometaphase	REACTOME_Pathways_01.03.2017	4.1e-20	1.5e-17	4.1e-20	4.1e-20	[-1]	Group07	7.54717	88	[AKT1, BCAR1, CAV1, CBX5, CD2, CD36, CD44, CD48, CD55, CDK1, CDK5, CENPC, CREBBP, CRK, CSF2RB, CSK, CTNNB1, DGKZ, EP300, EVL, F10, FYN, GP6, HABP4, HDAC1, HDAC2, HDAC3, HRAS, HSP90AA1, IL2RB, IL3, ITPR1, JAK2, LCP2, MAG, MAPK1, MAPK14, MAPK3, PDGFB, PECAM1, PIK3CA, PIK3CD, PIK3CG, PIK3R1, PIK3R2, PLAUR, PLCG1, PLCG2, PRKAA2, PRKAB1, PRKACA, PRKAG1, PRKAG2, PRKCD, PRKCE, PRKCH, PRKCQ, PRKCZ, PTK2,…
GO:0001822	Transport to the Golgi and subsequent modification	REACTOME_Pathways_01.03.2017	4.1e-20	1.5e-17	4.1e-20	4.1e-20	[-1]	Group07	7.54717	88	[AKT1, BCAR1, CAV1, CBX5, CD2, CD36, CD44, CD48, CD55, CDK1, CDK5, CENPC, CREBBP, CRK, CSF2RB, CSK, CTNNB1, DGKZ, EP300, EVL, F10, FYN, GP6, HABP4, HDAC1, HDAC2, HDAC3, HRAS, HSP90AA1, IL2RB, IL3, ITPR1, JAK2, LCP2, MAG, MAPK1, MAPK14, MAPK3, PDGFB, PECAM1, PIK3CA, PIK3CD, PIK3CG, PIK3R1, PIK3R2, PLAUR, PLCG1, PLCG2, PRKAA2, PRKAB1, PRKACA, PRKAG1, PRKAG2, PRKCD, PRKCE, PRKCH, PRKCQ, PRKCZ, PTK2,…
GO:0001852	Kinesins	REACTOME_Pathways_01.03.2017	4.1e-20	1.5e-17	4.1e-20	4.1e-20	[-1]	Group07	7.54717	88	[AKT1, BCAR1, CAV1, CBX5, CD2, CD36, CD44, CD48, CD55, CDK1, CDK5, CENPC, CREBBP, CRK, CSF2RB, CSK, CTNNB1, DGKZ, EP300, EVL, F10, FYN, GP6, HABP4, HDAC1, HDAC2, HDAC3, HRAS, HSP90AA1, IL2RB, IL3, ITPR1, JAK2, LCP2, MAG, MAPK1, MAPK14, MAPK3, PDGFB, PECAM1, PIK3CA, PIK3CD, PIK3CG, PIK3R1, PIK3R2, PLAUR, PLCG1, PLCG2, PRKAA2, PRKAB1, PRKACA, PRKAG1, PRKAG2, PRKCD, PRKCE, PRKCH, PRKCQ, PRKCZ, PTK2,…
GO:0001853	Factors involved in megakaryocyte development and platelet production	REACTOME_Pathways_01.03.2017	4.1e-20	1.5e-17	4.1e-20	4.1e-20	[-1]	Group07	7.54717	88	[AKT1, BCAR1, CAV1, CBX5, CD2, CD36, CD44, CD48, CD55, CDK1, CDK5, CENPC, CREBBP, CRK, CSF2RB, CSK, CTNNB1, DGKZ, EP300, EVL, F10, FYN, GP6, HABP4, HDAC1, HDAC2, HDAC3, HRAS, HSP90AA1, IL2RB, IL3, ITPR1, JAK2, LCP2, MAG, MAPK1, MAPK14, MAPK3, PDGFB, PECAM1, PIK3CA, PIK3CD, PIK3CG, PIK3R1, PIK3R2, PLAUR, PLCG1, PLCG2, PRKAA2, PRKAB1, PRKACA, PRKAG1, PRKAG2, PRKCD, PRKCE, PRKCH, PRKCQ, PRKCZ, PTK2,…
GO:0004012	ErbB signaling pathway	KEGG_01.03.2017	5.7e-26	2.3e-23	4.9e-98	4.9e-97	[-1]	Group08	34.8837	30	[AKT1, ARAF, BRAF, CBL, CBLB, CRK, EGFR, ELK1, GRB2, HRAS, MAP2K1, MAP2K2, MAPK1, MAPK3, MAPK8, MYC, PAK1, PAK2, PIK3CA, PIK3CD, PIK3R1, PIK3R2, PLCG1, PLCG2, PTK2, RAF1, SHC1, SOS1, SOS2, SRC]
GO:0004014	Ras signaling pathway	KEGG_01.03.2017	4.7e-41	2e-38	4.9e-98	4.9e-97	[-1]	Group08	25.5507	58	[AFDN, AKT1, BRAP, CSF1R, EGFR, ELK1, ETS1, FASLG, FLT1, GRB2, GRIN1, GRIN2A, GRIN2B, HRAS, INSR, KDR, KIT, KSR1, KSR2, MAP2K1, MAP2K2, MAPK1, MAPK3, MAPK8, MRAS, NF1, PAK1, PAK2, PDGFB, PDGFRB, PIK3CA, PIK3CD, PIK3R1, PIK3R2, PLCE1, PLCG1, PLCG2, PLD2, PRKACA, PTPN11, RAF1, RALGDS, RAP1A, RAP1B, RASA1, RASGRP1, RASGRP4, RASSF1, RASSF5, RGL1, RGL2, RIN1, SHC1, SHOC2, SOS1, SOS2, TIAM1, ZAP70]
GO:0004015	Rap1 signaling pathway	KEGG_01.03.2017	3e-27	1.2e-24	4.9e-98	4.9e-97	[-1]	Group08	20.9524	44	[AFDN, AKT1, BCAR1, BRAF, CRK, CSF1R, CTNNB1, EGFR, FLT1, FYB, GRIN1, GRIN2A, GRIN2B, HRAS, INSR, KDR, KIT, LCP2, MAP2K1, MAP2K2, MAPK1, MAPK14, MAPK3, MRAS, PDGFB, PDGFRB, PIK3CA, PIK3CD, PIK3R1, PIK3R2, PLCE1, PLCG1, PRKCI, PRKCZ, RAF1, RALGDS, RAP1A, RAP1B, RAP1GAP, RAPGEF1, RASSF5, SKAP1, SRC, TIAM1]
GO:0004062	Chemokine signaling pathway	KEGG_01.03.2017	1.5e-19	5.8e-17	4.9e-98	4.9e-97	[-1]	Group08	18.6813	34	[AKT1, BCAR1, BRAF, CRK, GRB2, HRAS, ITK, JAK2, MAP2K1, MAPK1, MAPK3, PAK1, PIK3CA, PIK3CD, PIK3R1, PIK3R2, PRKACA, PRKCD, PRKCZ, PTK2, PTK2B, PXN, RAF1, RAP1A, RAP1B, SHC1, SOS1, SOS2, SRC, STAT1, STAT3, TIAM1, VAV1, WAS]
GO:0004068	FoxO signaling pathway	KEGG_01.03.2017	1.3e-31	5.8e-29	4.9e-98	4.9e-97	[-1]	Group08	30.303	40	[AKT1, ARAF, BCL6, BRAF, CREBBP, EGFR, EP300, FASLG, GRB2, HRAS, IL7R, INSR, IRS1, MAP2K1, MAP2K2, MAPK1, MAPK14, MAPK3, MAPK8, MDM2, PIK3CA, PIK3CD, PIK3R1, PIK3R2, PLK3, PRKAA1, PRKAA2, PRKAB1, PRKAG1, PRKAG2, RAF1, SGK1, SLC2A4, SOS1, SOS2, STAT3, STK11, TGFB1, TGFBR2, USP7]
GO:0004072	Phospholipase D signaling pathway	KEGG_01.03.2017	6.5e-24	2.6e-21	4.9e-98	4.9e-97	[-1]	Group08	23.9726	35	[AGTR1, AKT1, DGKZ, EGFR, FYN, GRB2, HRAS, INSR, KIT, MAP2K1, MAP2K2, MAPK1, MAPK3, MRAS, PDGFB, PDGFRB, PIK3CA, PIK3CD, PIK3CG, PIK3R1, PIK3R2, PLCG1, PLCG2, PLD2, PTK2B, PTPN11, RAF1, RALGDS, RHEB, SHC1, SOS1, SOS2, SPHK1, SPHK2, SYK]
GO:0004151	PI3K-Akt signaling pathway	KEGG_01.03.2017	3.1e-24	1.2e-21	4.9e-98	4.9e-97	[-1]	Group08	14.9123	51	[AKT1, BCL2, CASP9, CD19, CSF1R, EGFR, FASLG, FLT1, GRB2, HRAS, HSP90AA1, IL2RB, IL3, IL7R, INSR, IRS1, ITGB4, JAK2, KDR, KIT, MAP2K1, MAP2K2, MAPK1, MAPK3, MDM2, MYC, PDGFB, PDGFRB, PIK3CA, PIK3CD, PIK3CG, PIK3R1, PIK3R2, PRKAA1, PRKAA2, PTK2, RAF1, RHEB, SGK1, SOS1, SOS2, STK11, SYK, TLR2, TP53, YWHAB, YWHAE, YWHAG, YWHAH, YWHAQ, YWHAZ]
GO:0004370	VEGF signaling pathway	KEGG_01.03.2017	4.5e-20	1.7e-17	4.9e-98	4.9e-97	[-1]	Group08	37.2881	22	[AKT1, CASP9, HRAS, HSPB1, KDR, MAP2K1, MAP2K2, MAPK1, MAPK14, MAPK3, PIK3CA, PIK3CD, PIK3R1, PIK3R2, PLCG1, PLCG2, PTK2, PXN, RAF1, SPHK1, SPHK2, SRC]
GO:0004510	Focal adhesion	KEGG_01.03.2017	4.3e-23	1.7e-20	4.9e-98	4.9e-97	[-1]	Group08	19.598	39	[AKT1, BCAR1, BCL2, BRAF, CAV1, CRK, CTNNB1, EGFR, ELK1, FLT1, FYN, GRB2, HRAS, ITGB4, KDR, MAP2K1, MAPK1, MAPK3, MAPK8, PAK1, PAK2, PARVA, PDGFB, PDGFRB, PIK3CA, PIK3CD, PIK3R1, PIK3R2, PTK2, PXN, RAF1, RAP1A, RAP1B, RAPGEF1, SHC1, SOS1, SOS2, SRC, VAV1]
GO:0004650	Natural killer cell mediated cytotoxicity	KEGG_01.03.2017	4.1e-23	1.6e-20	4.9e-98	4.9e-97	[-1]	Group08	24.812	33	[ARAF, BRAF, CASP3, CD247, CD48, FAS, FASLG, FYN, GRB2, HRAS, LCP2, MAP2K1, MAP2K2, MAPK1, MAPK3, PAK1, PIK3CA, PIK3CD, PIK3R1, PIK3R2, PLCG1, PLCG2, PTK2B, PTPN11, RAF1, SH2D1A, SH3BP2, SHC1, SOS1, SOS2, SYK, VAV1, ZAP70]
GO:0004660	T cell receptor signaling pathway	KEGG_01.03.2017	2.4e-23	9.9e-21	4.9e-98	4.9e-97	[-1]	Group08	29.1262	30	[AKT1, CBL, CBLB, CD247, CTLA4, FYN, GRB2, HRAS, ITK, LCP2, MAP2K1, MAP2K2, MAPK1, MAPK14, MAPK3, PAK1, PAK2, PIK3CA, PIK3CD, PIK3R1, PIK3R2, PLCG1, PRKCQ, PTPRC, RAF1, RASGRP1, SOS1, SOS2, VAV1, ZAP70]
GO:0004664	Fc epsilon RI signaling pathway	KEGG_01.03.2017	8.3e-20	3.1e-17	4.9e-98	4.9e-97	[-1]	Group08	33.8235	23	[AKT1, FYN, GRB2, HRAS, IL3, LCP2, MAP2K1, MAP2K2, MAPK1, MAPK14, MAPK3, MAPK8, PIK3CA, PIK3CD, PIK3R1, PIK3R2, PLCG1, PLCG2, RAF1, SOS1, SOS2, SYK, VAV1]
GO:0004666	Fc gamma R-mediated phagocytosis	KEGG_01.03.2017	6.2e-19	2.3e-16	4.9e-98	4.9e-97	[-1]	Group08	27.4725	25	[AKT1, CRK, FCGR2A, MAP2K1, MAPK1, MAPK3, PAK1, PIK3CA, PIK3CD, PIK3R1, PIK3R2, PLCG1, PLCG2, PLD2, PRKCD, PRKCE, PTPRC, RAF1, SPHK1, SPHK2, SYK, VAV1, WAS, WASF1, WASF2]
GO:0004722	Neurotrophin signaling pathway	KEGG_01.03.2017	1.2e-33	5.5e-31	4.9e-98	4.9e-97	[-1]	Group08	33.6134	40	[AKT1, BCL2, BRAF, CAMK4, CRK, FASLG, GRB2, HRAS, IRAK1, IRAK2, IRS1, MAP2K1, MAP2K2, MAP3K5, MAPK1, MAPK14, MAPK3, MAPK8, NTRK2, PIK3CA, PIK3CD, PIK3R1, PIK3R2, PLCG1, PLCG2, PRKCD, PTPN11, RAF1, RAP1A, RAP1B, RAPGEF1, RPS6KA2, SH2B2, SHC1, SOS1, SOS2, TP53, TP73, TRAF6, YWHAE]
GO:0004910	Insulin signaling pathway	KEGG_01.03.2017	3.1e-33	1.3e-30	4.9e-98	4.9e-97	[-1]	Group08	30.4348	42	[ACACA, ACACB, AKT1, ARAF, BRAF, CBL, CBLB, CRK, ELK1, FLOT1, FLOT2, GRB2, HRAS, INSR, IRS1, MAP2K1, MAP2K2, MAPK1, MAPK3, MAPK8, PIK3CA, PIK3CD, PIK3R1, PIK3R2, PRKAA1, PRKAA2, PRKAB1, PRKACA, PRKAG1, PRKAG2, PRKCI, PRKCZ, PTPRF, RAF1, RAPGEF1, RHEB, SH2B2, SHC1, SLC2A4, SOCS1, SOS1, SOS2]
GO:0004919	Thyroid hormone signaling pathway	KEGG_01.03.2017	1.5e-20	6.1e-18	4.9e-98	4.9e-97	[-1]	Group08	25	29	[AKT1, CASP9, CREBBP, CTNNB1, EP300, HDAC1, HDAC2, HDAC3, HRAS, MAP2K1, MAP2K2, MAPK1, MAPK3, MDM2, MYC, PFKFB2, PIK3CA, PIK3CD, PIK3R1, PIK3R2, PLCE1, PLCG1, PLCG2, PRKACA, RAF1, RHEB, SRC, STAT1, TP53]
GO:0005161	Hepatitis B	KEGG_01.03.2017	6.3e-22	2.4e-19	4.9e-98	4.9e-97	[-1]	Group08	22.9167	33	[AKT1, BCL2, CASP3, CASP8, CASP9, CREBBP, ELK1, EP300, FAS, FASLG, GRB2, HRAS, MAP2K1, MAP2K2, MAPK1, MAPK3, MAPK8, MYC, PIK3CA, PIK3CD, PIK3R1, PIK3R2, PTK2B, RAF1, SRC, STAT1, STAT3, TGFB1, TLR2, TP53, YWHAB, YWHAQ, YWHAZ]
GO:0005200	Pathways in cancer	KEGG_01.03.2017	1.7e-34	7.4e-32	4.9e-98	4.9e-97	[-1]	Group08	16.7089	66	[AGTR1, AKT1, AR, ARAF, BCL2, BRAF, CASP3, CASP8, CASP9, CBL, CBLB, CREBBP, CRK, CSF1R, CTNNB1, DAPK3, EGFR, EP300, ETS1, FAS, FASLG, GRB2, HDAC1, HDAC2, HRAS, HSP90AA1, JUP, KIT, MAP2K1, MAP2K2, MAPK1, MAPK3, MAPK8, MDM2, MECOM, MYC, NFKB2, PDGFB, PDGFRB, PIK3CA, PIK3CD, PIK3R1, PIK3R2, PLCG1, PLCG2, PML, PRKACA, PTK2, RAD51, RAF1, RALGDS, RASGRP1, RASGRP4, RASSF1, RASSF5, SOS1, SOS2, STAT1, STA…
GO:0005203	Viral carcinogenesis	KEGG_01.03.2017	6.2e-22	2.4e-19	4.9e-98	4.9e-97	[-1]	Group08	18.9055	38	[CASP3, CASP8, CDK1, CREBBP, EP300, GRB2, HDAC1, HDAC2, HDAC3, HDAC4, HDAC5, HDAC6, HDAC9, HNRNPK, HRAS, MAPK1, MAPK3, MDM2, NFKB2, PIK3CA, PIK3CD, PIK3R1, PIK3R2, PRKACA, PXN, SNW1, SRC, STAT3, SYK, TP53, TRAF3, USP7, YWHAB, YWHAE, YWHAG, YWHAH, YWHAQ, YWHAZ]
GO:0005205	Proteoglycans in cancer	KEGG_01.03.2017	3.7e-31	1.5e-28	4.9e-98	4.9e-97	[-1]	Group08	23.1527	47	[AKT1, ARAF, BRAF, CASP3, CAV1, CBL, CBLB, CD44, CTNNB1, EGFR, ELK1, FAS, FASLG, GRB2, HRAS, ITPR1, KDR, MAP2K1, MAP2K2, MAPK1, MAPK14, MAPK3, MDM2, MRAS, MYC, PAK1, PIK3CA, PIK3CD, PIK3R1, PIK3R2, PLAUR, PLCE1, PLCG1, PLCG2, PRKACA, PTK2, PTPN11, PXN, RAF1, SOS1, SOS2, SRC, STAT3, TGFB1, TIAM1, TLR2, TP53]
GO:0005210	Colorectal cancer	KEGG_01.03.2017	6.9e-20	2.6e-17	4.9e-98	4.9e-97	[-1]	Group08	36.6667	22	[AKT1, ARAF, BCL2, BRAF, CASP3, CASP9, CTNNB1, MAP2K1, MAPK1, MAPK3, MAPK8, MYC, PIK3CA, PIK3CD, PIK3R1, PIK3R2, RAF1, RALGDS, TCF7L2, TGFB1, TGFBR2, TP53]
GO:0005211	Renal cell carcinoma	KEGG_01.03.2017	2.3e-27	9.5e-25	4.9e-98	4.9e-97	[-1]	Group08	43.0769	28	[AKT1, ARAF, BRAF, CREBBP, CRK, EP300, ETS1, GRB2, HRAS, MAP2K1, MAP2K2, MAPK1, MAPK3, PAK1, PAK2, PDGFB, PIK3CA, PIK3CD, PIK3R1, PIK3R2, PTPN11, RAF1, RAP1A, RAP1B, RAPGEF1, SOS1, SOS2, TGFB1]
GO:0005213	Endometrial cancer	KEGG_01.03.2017	1.7e-23	6.9e-21	4.9e-98	4.9e-97	[-1]	Group08	46	23	[AKT1, ARAF, BRAF, CASP9, CTNNB1, EGFR, ELK1, GRB2, HRAS, MAP2K1, MAP2K2, MAPK1, MAPK3, MYC, PIK3CA, PIK3CD, PIK3R1, PIK3R2, RAF1, SOS1, SOS2, TCF7L2, TP53]
GO:0005214	Glioma	KEGG_01.03.2017	7.3e-22	2.8e-19	4.9e-98	4.9e-97	[-1]	Group08	37.5	24	[AKT1, ARAF, BRAF, EGFR, GRB2, HRAS, MAP2K1, MAP2K2, MAPK1, MAPK3, MDM2, PDGFB, PDGFRB, PIK3CA, PIK3CD, PIK3R1, PIK3R2, PLCG1, PLCG2, RAF1, SHC1, SOS1, SOS2, TP53]
GO:0005215	Prostate cancer	KEGG_01.03.2017	1.7e-24	7.1e-22	4.9e-98	4.9e-97	[-1]	Group08	33.3333	29	[AKT1, AR, ARAF, BCL2, BRAF, CASP9, CREBBP, CTNNB1, EGFR, EP300, GRB2, HRAS, HSP90AA1, MAP2K1, MAP2K2, MAPK1, MAPK3, MDM2, PDGFB, PDGFRB, PIK3CA, PIK3CD, PIK3R1, PIK3R2, RAF1, SOS1, SOS2, TCF7L2, TP53]
GO:0005220	Chronic myeloid leukemia	KEGG_01.03.2017	1.7e-27	7.2e-25	4.9e-98	4.9e-97	[-1]	Group08	40.8451	29	[AKT1, ARAF, BRAF, CBL, CBLB, CRK, GRB2, HDAC1, HDAC2, HRAS, MAP2K1, MAP2K2, MAPK1, MAPK3, MDM2, MECOM, MYC, PIK3CA, PIK3CD, PIK3R1, PIK3R2, PTPN11, RAF1, SHC1, SOS1, SOS2, TGFB1, TGFBR2, TP53]
GO:0005221	Acute myeloid leukemia	KEGG_01.03.2017	2.6e-22	1e-19	4.9e-98	4.9e-97	[-1]	Group08	41.8182	23	[AKT1, ARAF, BRAF, GRB2, HRAS, JUP, KIT, MAP2K1, MAP2K2, MAPK1, MAPK3, MYC, PIK3CA, PIK3CD, PIK3R1, PIK3R2, PML, RAF1, SOS1, SOS2, STAT3, TCF7L2, ZBTB16]
GO:0005223	Non-small cell lung cancer	KEGG_01.03.2017	1.5e-22	6.2e-20	4.9e-98	4.9e-97	[-1]	Group08	42.5926	23	[AKT1, ARAF, BRAF, CASP9, EGFR, GRB2, HRAS, MAP2K1, MAP2K2, MAPK1, MAPK3, PIK3CA, PIK3CD, PIK3R1, PIK3R2, PLCG1, PLCG2, RAF1, RASSF1, RASSF5, SOS1, SOS2, TP53]
GO:0005231	Choline metabolism in cancer	KEGG_01.03.2017	2.8e-20	1.1e-17	4.9e-98	4.9e-97	[-1]	Group08	27.2727	27	[AKT1, DGKZ, EGFR, GRB2, HRAS, MAP2K1, MAP2K2, MAPK1, MAPK3, MAPK8, PDGFB, PDGFRB, PIK3CA, PIK3CD, PIK3R1, PIK3R2, PLCG1, PLD2, RAF1, RALGDS, RHEB, SOS1, SOS2, SP1, WAS, WASF1, WASF2]
GO:0000127	IL-5 Signaling Pathway	WikiPathways_01.03.2017	9e-25	3.6e-22	4.9e-98	4.9e-97	[-1]	Group08	55	22	[AKT1, BCL2, CSF2RB, ELK1, GRB2, JAK2, MAP2K1, MAP2K2, MAPK1, MAPK3, MAPT, MYC, PIK3CG, PIK3R1, PIK3R2, PTPN11, RAF1, SHC1, SOS1, STAT1, STAT3, SYK]
GO:0002034	Leptin signaling pathway	WikiPathways_01.03.2017	9.5e-31	4e-28	4.9e-98	4.9e-97	[-1]	Group08	42.1053	32	[ACACA, ACACB, AKT1, ELK1, FYN, GRB2, HRAS, IRS1, JAK2, KHDRBS1, LEP, MAP2K1, MAP2K2, MAPK1, MAPK14, MAPK3, MAPK8, PIK3R1, PIK3R2, PLCG1, PLCG2, PRKAA1, PRKAA2, PTK2, PTPN11, RAF1, SHC1, SOS1, SP1, SRC, STAT1, STAT3]
GO:0002037	Prolactin Signaling Pathway	WikiPathways_01.03.2017	8.1e-37	3.5e-34	4.9e-98	4.9e-97	[-1]	Group08	47.3684	36	[AKT1, CASP3, CBL, ELK1, FYN, GRB2, HRAS, IRS1, JAK2, MAP2K1, MAP2K2, MAPK1, MAPK14, MAPK3, MAPK8, MYC, PAK1, PIK3CA, PIK3CG, PIK3R1, PIK3R2, PTK2, PTPN11, PXN, RAF1, RPS6KA2, SHC1, SOCS1, SOS1, SRC, STAT1, STAT3, VAV1, YWHAG, YWHAZ, ZAP70]
GO:0002261	Signaling Pathways in Glioblastoma	WikiPathways_01.03.2017	7.1e-28	2.9e-25	4.9e-98	4.9e-97	[-1]	Group08	37.3494	31	[AKT1, ARAF, BRAF, CBL, EGFR, EP300, GRB2, HRAS, IRS1, MAP2K1, MAP2K2, MAPK1, MAPK3, MDM2, NF1, PDGFRB, PIK3CA, PIK3CD, PIK3CG, PIK3R1, PIK3R2, PLCG1, PLCG2, PRKCD, PRKCH, PRKCI, PRKCQ, PRKCZ, RAF1, SRC, TP53]
GO:0000023	B Cell Receptor Signaling Pathway	WikiPathways_01.03.2017	6.3e-32	2.6e-29	4.9e-98	4.9e-97	[-1]	Group08	36.7347	36	[AKT1, BCL6, BRAF, CBL, CD19, CD79A, CD79B, CRK, ELK1, ETS1, FYN, GRB2, HRAS, MAP2K1, MAP2K2, MAPK1, MAPK14, MAPK8, MEF2C, MEF2D, MYC, PIK3CG, PIK3R1, PIK3R2, PLCG1, PLCG2, PRKCD, PTPN11, PTPRC, RAF1, RAPGEF1, SH3BP2, SHC1, SOS1, SYK, VAV1]
GO:0002332	Interleukin-11 Signaling Pathway	WikiPathways_01.03.2017	1.9e-20	7.3e-18	4.9e-98	4.9e-97	[-1]	Group08	45.4545	20	[AKT1, BCL2, FYN, GRB2, HRAS, JAK2, MAP2K1, MAP2K2, MAPK1, MAPK3, PIK3R1, PIK3R2, PTPN11, RAF1, RUNX2, SRC, STAT1, STAT3, TGFB1, TYK2]
GO:0002355	Corticotropin-releasing hormone signaling pathway	WikiPathways_01.03.2017	4.6e-21	1.8e-18	4.9e-98	4.9e-97	[-1]	Group08	29.0323	27	[ACACA, AKT1, BCL2, BRAF, CASP3, CASP9, CTNNB1, ELK1, HSP90AA1, JUP, MAP2K1, MAP3K5, MAPK1, MAPK14, MAPK3, MAPK8, PLCG1, PLCG2, PRKAA2, PRKCD, PRKCI, PRKCQ, PTK2, RAF1, RAP1B, SP1, TGFB1]
GO:0002374	Oncostatin M Signaling Pathway	WikiPathways_01.03.2017	1.1e-25	4.5e-23	4.9e-98	4.9e-97	[-1]	Group08	40.9091	27	[AKT1, CASP3, GRB2, HRAS, IRS1, JAK2, MAP2K1, MAP2K2, MAPK1, MAPK14, MAPK3, MAPK8, PIK3R1, PRKCD, PRKCE, PRKCH, PTK2B, PTPN11, PXN, RAF1, SHC1, SOS1, SRC, STAT1, STAT3, TP53, TYK2]
GO:0002377	Integrated Pancreatic Cancer Pathway	WikiPathways_01.03.2017	1.7e-28	7.3e-26	4.9e-98	4.9e-97	[-1]	Group08	22.335	44	[AKT1, AR, BCL2, CASP3, CASP8, CASP9, CDC25C, CREBBP, CRK, CTNNB1, DAXX, EGFR, EP300, EZH2, FAS, FASLG, GRB2, HNF4A, IL3, MAP2K1, MAP3K4, MAP3K5, MAPK1, MAPK14, MAPK3, MAPK8, MAPT, MDM2, MYC, PAK1, PIK3CA, PML, PRKAA2, RAD51, RAF1, RAP1A, RHEB, SOS1, SP1, SRC, STAT1, STK11, TGFB1, TP53]
GO:0002380	Brain-Derived Neurotrophic Factor (BDNF) signaling pathway	WikiPathways_01.03.2017	3.8e-36	1.6e-33	4.9e-98	4.9e-97	[-1]	Group08	31.25	45	[ACACB, AKT1, CAMK4, CASP3, CDK5, CTNNB1, ELK1, FYN, GRB2, GRIN1, GRIN2B, HRAS, IRS1, JAK2, KSR1, MAP2K1, MAP2K2, MAPK1, MAPK14, MAPK3, MAPK8, MAPT, MEF2A, MEF2C, NCAM1, NTRK2, PIK3R1, PIK3R2, PLCG1, PRKAA1, PRKAA2, PRKCD, PTK2B, PTPN11, PTPRF, RACK1, RAF1, RAP1A, SH2B2, SHC1, SRC, STAT1, STAT3, TIAM1, TRAF6]
GO:0002526	PDGF Pathway	WikiPathways_01.03.2017	4.1e-25	1.6e-22	4.9e-98	4.9e-97	[-1]	Group08	56.4103	22	[ELK1, GRB2, HRAS, MAP2K1, MAPK1, MAPK3, MAPK8, PAK1, PDGFB, PDGFRB, PIK3R1, PLCG1, PTPN11, RAF1, RASA1, SHC1, SOS1, SRC, STAT1, STAT3, TIAM1, VAV1]
GO:0000286	IL-3 Signaling Pathway	WikiPathways_01.03.2017	1.2e-33	5.2e-31	4.9e-98	4.9e-97	[-1]	Group08	59.1837	29	[AKT1, BCL2, CBL, CSF2RB, FYN, GRB2, HRAS, IL3, JAK2, MAP2K1, MAPK1, MAPK3, MAPK8, PIK3CD, PIK3R1, PIK3R2, PRKACA, PTPN11, RAF1, RAPGEF1, SHC1, SOS1, SRC, STAT3, SYK, TGFB1, VAV1, YWHAB, YWHAQ]
GO:0000304	Kit receptor signaling pathway	WikiPathways_01.03.2017	5.3e-35	2.3e-32	4.9e-98	4.9e-97	[-1]	Group08	53.3333	32	[AKT1, BCL2, CBL, CRK, DOK1, EP300, FYN, GRB10, GRB2, HRAS, JAK2, KIT, MAP2K1, MAP2K2, MAPK1, MAPK14, MAPK3, MAPK8, MAPT, PIK3R1, PIK3R2, PLCG1, PTPN11, RAF1, SH2B2, SHC1, SOCS1, SOS1, SRC, STAT1, STAT3, VAV1]
GO:0000306	Focal Adhesion	WikiPathways_01.03.2017	2.1e-25	8.7e-23	4.9e-98	4.9e-97	[-1]	Group08	20.9184	41	[AKT1, ARAF, BCAR1, BCL2, BRAF, CAV1, CRK, CTNNB1, EGFR, ELK1, FLT1, FYN, GRB2, HRAS, ITGB4, KDR, MAP2K1, MAP2K2, MAPK1, MAPK8, PAK1, PAK2, PDGFB, PDGFRB, PIK3CA, PIK3CD, PIK3CG, PIK3R1, PIK3R2, PTK2, PXN, RAF1, RAP1A, RAP1B, RAPGEF1, SHC1, SOS1, SRC, TNK2, TXK, VAV1]
GO:0000313	Signaling of Hepatocyte Growth Factor Receptor	WikiPathways_01.03.2017	6.7e-29	2.8e-26	4.9e-98	4.9e-97	[-1]	Group08	67.6471	23	[CRK, ELK1, GRB2, HRAS, MAP2K1, MAP2K2, MAPK1, MAPK3, MAPK8, PAK1, PIK3CA, PTK2, PTK2B, PTPN11, PXN, RAF1, RAP1A, RAP1B, RAPGEF1, RASA1, SOS1, SRC, STAT3]
GO:0003303	Rac1/Pak1/p38/MMP-2 pathway	WikiPathways_01.03.2017	3.9e-21	1.5e-18	4.9e-98	4.9e-97	[-1]	Group08	35.2941	24	[AKT1, CASP9, CRK, CTNNB1, EGFR, GRB2, HRAS, MAPK1, MAPK14, MAPK3, MAPK8, MYC, PAK1, PIK3CA, PIK3R1, PTK2, PTPN11, PXN, RAD51, RASA1, SOS1, SRC, STAT3, TP53]
GO:0000364	IL-6 signaling pathway	WikiPathways_01.03.2017	3.4e-19	1.3e-16	4.9e-98	4.9e-97	[-1]	Group08	44.186	19	[AKT1, CREBBP, GRB2, HDAC1, JAK2, MAP2K1, MAP2K2, MAPK1, MAPK3, PIK3R1, PIK3R2, PRKCD, PTPN11, SHC1, SOS1, STAT1, STAT3, TYK2, VAV1]
GO:0003915	Angiopoietin Like Protein 8 Regulatory Pathway	WikiPathways_01.03.2017	1e-26	4.3e-24	4.9e-98	4.9e-97	[-1]	Group08	27.2727	36	[AKT1, CBL, CBLB, CRK, FLOT1, FLOT2, HRAS, INSR, IRS1, MAP2K1, MAP2K2, MAP3K4, MAP3K5, MAPK1, MAPK14, MAPK3, MAPK8, PIK3CA, PIK3CD, PIK3CG, PIK3R1, PIK3R2, PRKAA1, PRKAA2, PRKAB1, PRKAG1, PRKAG2, RAF1, RAPGEF1, RHEB, RPS6KA2, RPS6KA4, SHC1, SLC2A4, SOS1, SOS2]
GO:0003929	Chemokine signaling pathway	WikiPathways_01.03.2017	5.7e-21	2.2e-18	4.9e-98	4.9e-97	[-1]	Group08	20.6061	34	[AKT1, BCAR1, BRAF, CRK, CSK, GRB2, HRAS, ITK, JAK2, MAP2K1, MAPK1, MAPK3, PAK1, PIK3CA, PIK3CD, PIK3CG, PIK3R1, PIK3R2, PRKCD, PRKCZ, PTK2, PTK2B, PXN, RAF1, RAP1A, RAP1B, SHC1, SOS1, SOS2, STAT1, STAT3, TIAM1, VAV1, WAS]
GO:0000395	IL-4 Signaling Pathway	WikiPathways_01.03.2017	1.8e-19	6.8e-17	4.9e-98	4.9e-97	[-1]	Group08	38.1818	21	[AKT1, CBL, ELK1, EP300, GRB2, IRS1, JAK2, MAPK1, MAPK14, MAPK3, PIK3CA, PIK3CD, PIK3R1, PIK3R2, PTPN11, SHC1, SOCS1, SOS1, STAT1, STAT3, TYK2]
GO:0000437	EGF/EGFR Signaling Pathway	WikiPathways_01.03.2017	2e-43	8.7e-41	4.9e-98	4.9e-97	[-1]	Group08	32.3171	53	[AKT1, BCAR1, BRAF, CAV1, CBL, CBLB, CRK, CSK, EGFR, ELK1, GRB10, GRB2, HRAS, JAK2, MAP2K1, MAP2K2, MAP3K4, MAPK1, MAPK14, MAPK8, MEF2A, MEF2C, MEF2D, PAK1, PEBP1, PIK3R1, PIK3R2, PLCE1, PLCG1, PLD2, PRKCD, PRKCI, PRKCZ, PTK2, PTK2B, PTPN11, PTPN5, RAF1, RALGDS, RAP1A, RASA1, RIN1, RPS6KA2, SHC1, SOS1, SOS2, SP1, SRC, STAT1, STAT3, TNK2, USP8, VAV1]
GO:0000481	Insulin Signaling	WikiPathways_01.03.2017	3.3e-36	1.4e-33	4.9e-98	4.9e-97	[-1]	Group08	29.1925	47	[AKT1, ARHGAP33, CBL, CBLB, CRK, ELK1, FLOT1, FLOT2, GRB10, GRB2, HRAS, INSR, IRS1, MAP2K1, MAP2K2, MAP3K4, MAP3K5, MAPK1, MAPK14, MAPK3, MAPK8, PIK3CA, PIK3CD, PIK3CG, PIK3R1, PIK3R2, PRKAA1, PRKAA2, PRKCD, PRKCH, PRKCI, PRKCQ, PRKCZ, PTPN11, PTPRF, RAF1, RAPGEF1, RHEB, RPS6KA2, RPS6KA4, SGK1, SH2B2, SHC1, SLC2A4, SOCS1, SOS1, SOS2]
GO:0000049	IL-2 Signaling Pathway	WikiPathways_01.03.2017	3.9e-24	1.5e-21	4.9e-98	4.9e-97	[-1]	Group08	52.381	22	[AKT1, BCL2, CBL, FYN, GRB2, HRAS, IL2RB, MAP2K1, MAP2K2, MAPK1, MAPK3, MAPT, MYC, PIK3R1, PTK2B, PTPN11, RAF1, SHC1, SOS1, STAT1, STAT3, SYK]
GO:0000581	EPO Receptor Signaling	WikiPathways_01.03.2017	3.9e-23	1.5e-20	4.9e-98	4.9e-97	[-1]	Group08	69.2308	18	[AKT1, GRB2, IRS1, JAK2, MAP2K1, MAP2K2, MAPK1, MAPK3, PIK3CG, PTPRC, RAF1, RASA1, SHC1, SOCS1, SOS1, SRC, STAT1, STAT3]
GO:0000069	T-Cell antigen Receptor (TCR) Signaling Pathway	WikiPathways_01.03.2017	2.6e-33	1.1e-30	4.9e-98	4.9e-97	[-1]	Group08	39.5604	36	[AKT1, CBL, CBLB, CD247, CRK, FAS, FYB, FYN, GRB2, HRAS, ITK, ITPR1, LCP2, MAP2K1, MAP2K2, MAPK1, MAPK14, MAPK3, MAPK8, PAK1, PIK3R1, PIK3R2, PLCG1, PRKCD, PRKCQ, PTK2B, PTPN11, RAF1, SHC1, SKAP1, SOS1, TGFB1, TRAF6, VAV1, WAS, ZAP70]
GO:0001473	Signaling by RAS mutants	REACTOME_Pathways_01.03.2017	1.6e-19	6e-17	4.9e-98	4.9e-97	[-1]	Group08	35.4839	22	[ARAF, BCAR1, BRAF, BRAP, CRK, CSK, HRAS, JAK2, KSR1, KSR2, MAP2K1, MAP2K2, MAPK1, MAPK3, NF1, PEBP1, PXN, RAF1, RAP1A, RAP1B, RASA1, YWHAB]
GO:0001729	PTK6 Regulates RHO GTPases, RAS GTPase and MAP kinases	REACTOME_Pathways_01.03.2017	1.6e-19	6e-17	4.9e-98	4.9e-97	[-1]	Group08	35.4839	22	[ARAF, BCAR1, BRAF, BRAP, CRK, CSK, HRAS, JAK2, KSR1, KSR2, MAP2K1, MAP2K2, MAPK1, MAPK3, NF1, PEBP1, PXN, RAF1, RAP1A, RAP1B, RASA1, YWHAB]
GO:0000001	Apoptosis	REACTOME_Pathways_01.03.2017	9.2e-42	4e-39	9.7e-34	4.8e-33	[-1]	Group09	6.93261	179	[AGTR1, AKT1, AR, ARAF, ARHGAP33, BCAR1, BCL2, BRAF, BRAP, CAMK4, CASP3, CASP8, CASP9, CAV1, CBL, CD19, CD55, CDC25C, CDK1, CDK5, CENPC, CFLAR, CNTN1, CREBBP, CRK, CSF2RB, CSK, CTNNB1, DAPK3, DGKZ, DLG4, DOK1, EEF2K, EGFR, ELK1, EP300, EVL, FAS, FASLG, FCER2, FLT1, FNTA, FNTB, FYN, GRAP, GRB10, GRIN1, GRIN2A, GRIN2B, GRIN2D, HDAC1, HDAC2, HDAC3, HDAC4, HDAC5, HDAC6, HDAC9, HRAS, HSP90AA1, HSPB1, …
GO:0000058	IRS-mediated signalling	REACTOME_Pathways_01.03.2017	4.5e-40	1.9e-37	9.7e-34	4.8e-33	[-1]	Group09	6.22222	196	[AGL, AGTR1, AKT1, AR, ARAF, BCAR1, BCL2, BCL6, BRAF, BRAP, CAMK4, CASP3, CASP8, CASP9, CAV1, CBL, CBLB, CD19, CD36, CD44, CD55, CD79A, CD79B, CDC25A, CDC25C, CDK1, CENPC, CIITA, CPNE1, CREBBP, CRK, CSF1R, CSF2RB, CSK, CTNNB1, DGKZ, DLG4, DOK1, DOK3, DOK4, EEF2K, EGFR, ELK1, EP300, ETS1, EVL, EZH2, FASLG, FCER2, FCGR2A, FLT1, FYB, FYN, GRAP, GRB10, GRIN1, GRIN2A, GRIN2B, GRIN2D, HDAC1, HDAC2, HDA…
GO:0000061	SOS-mediated signalling	REACTOME_Pathways_01.03.2017	4.5e-40	1.9e-37	9.7e-34	4.8e-33	[-1]	Group09	6.22222	196	[AGL, AGTR1, AKT1, AR, ARAF, BCAR1, BCL2, BCL6, BRAF, BRAP, CAMK4, CASP3, CASP8, CASP9, CAV1, CBL, CBLB, CD19, CD36, CD44, CD55, CD79A, CD79B, CDC25A, CDC25C, CDK1, CENPC, CIITA, CPNE1, CREBBP, CRK, CSF1R, CSF2RB, CSK, CTNNB1, DGKZ, DLG4, DOK1, DOK3, DOK4, EEF2K, EGFR, ELK1, EP300, ETS1, EVL, EZH2, FASLG, FCER2, FCGR2A, FLT1, FYB, FYN, GRAP, GRB10, GRIN1, GRIN2A, GRIN2B, GRIN2D, HDAC1, HDAC2, HDA…
GO:0000072	Downstream signaling events of B Cell Receptor (BCR)	REACTOME_Pathways_01.03.2017	4.5e-40	1.9e-37	9.7e-34	4.8e-33	[-1]	Group09	6.22222	196	[AGL, AGTR1, AKT1, AR, ARAF, BCAR1, BCL2, BCL6, BRAF, BRAP, CAMK4, CASP3, CASP8, CASP9, CAV1, CBL, CBLB, CD19, CD36, CD44, CD55, CD79A, CD79B, CDC25A, CDC25C, CDK1, CENPC, CIITA, CPNE1, CREBBP, CRK, CSF1R, CSF2RB, CSK, CTNNB1, DGKZ, DLG4, DOK1, DOK3, DOK4, EEF2K, EGFR, ELK1, EP300, ETS1, EVL, EZH2, FASLG, FCER2, FCGR2A, FLT1, FYB, FYN, GRAP, GRB10, GRIN1, GRIN2A, GRIN2B, GRIN2D, HDAC1, HDAC2, HDA…
GO:0000073	Activation of NF-kappaB in B cells	REACTOME_Pathways_01.03.2017	4.5e-40	1.9e-37	9.7e-34	4.8e-33	[-1]	Group09	6.22222	196	[AGL, AGTR1, AKT1, AR, ARAF, BCAR1, BCL2, BCL6, BRAF, BRAP, CAMK4, CASP3, CASP8, CASP9, CAV1, CBL, CBLB, CD19, CD36, CD44, CD55, CD79A, CD79B, CDC25A, CDC25C, CDK1, CENPC, CIITA, CPNE1, CREBBP, CRK, CSF1R, CSF2RB, CSK, CTNNB1, DGKZ, DLG4, DOK1, DOK3, DOK4, EEF2K, EGFR, ELK1, EP300, ETS1, EVL, EZH2, FASLG, FCER2, FCGR2A, FLT1, FYB, FYN, GRAP, GRB10, GRIN1, GRIN2A, GRIN2B, GRIN2D, HDAC1, HDAC2, HDA…
GO:0000089	Regulation of Hypoxia-inducible Factor (HIF) by oxygen	REACTOME_Pathways_01.03.2017	4.5e-40	1.9e-37	9.7e-34	4.8e-33	[-1]	Group09	6.22222	196	[AGL, AGTR1, AKT1, AR, ARAF, BCAR1, BCL2, BCL6, BRAF, BRAP, CAMK4, CASP3, CASP8, CASP9, CAV1, CBL, CBLB, CD19, CD36, CD44, CD55, CD79A, CD79B, CDC25A, CDC25C, CDK1, CENPC, CIITA, CPNE1, CREBBP, CRK, CSF1R, CSF2RB, CSK, CTNNB1, DGKZ, DLG4, DOK1, DOK3, DOK4, EEF2K, EGFR, ELK1, EP300, ETS1, EVL, EZH2, FASLG, FCER2, FCGR2A, FLT1, FYB, FYN, GRAP, GRB10, GRIN1, GRIN2A, GRIN2B, GRIN2D, HDAC1, HDAC2, HDA…
GO:0000090	Oxygen-dependent proline hydroxylation of Hypoxia-inducible Factor Alpha	REACTOME_Pathways_01.03.2017	4.5e-40	1.9e-37	9.7e-34	4.8e-33	[-1]	Group09	6.22222	196	[AGL, AGTR1, AKT1, AR, ARAF, BCAR1, BCL2, BCL6, BRAF, BRAP, CAMK4, CASP3, CASP8, CASP9, CAV1, CBL, CBLB, CD19, CD36, CD44, CD55, CD79A, CD79B, CDC25A, CDC25C, CDK1, CENPC, CIITA, CPNE1, CREBBP, CRK, CSF1R, CSF2RB, CSK, CTNNB1, DGKZ, DLG4, DOK1, DOK3, DOK4, EEF2K, EGFR, ELK1, EP300, ETS1, EVL, EZH2, FASLG, FCER2, FCGR2A, FLT1, FYB, FYN, GRAP, GRB10, GRIN1, GRIN2A, GRIN2B, GRIN2D, HDAC1, HDAC2, HDA…
GO:0000094	ER-Phagosome pathway	REACTOME_Pathways_01.03.2017	4.5e-40	1.9e-37	9.7e-34	4.8e-33	[-1]	Group09	6.22222	196	[AGL, AGTR1, AKT1, AR, ARAF, BCAR1, BCL2, BCL6, BRAF, BRAP, CAMK4, CASP3, CASP8, CASP9, CAV1, CBL, CBLB, CD19, CD36, CD44, CD55, CD79A, CD79B, CDC25A, CDC25C, CDK1, CENPC, CIITA, CPNE1, CREBBP, CRK, CSF1R, CSF2RB, CSK, CTNNB1, DGKZ, DLG4, DOK1, DOK3, DOK4, EEF2K, EGFR, ELK1, EP300, ETS1, EVL, EZH2, FASLG, FCER2, FCGR2A, FLT1, FYB, FYN, GRAP, GRB10, GRIN1, GRIN2A, GRIN2B, GRIN2D, HDAC1, HDAC2, HDA…
GO:0000095	Antigen processing-Cross presentation	REACTOME_Pathways_01.03.2017	4.5e-40	1.9e-37	9.7e-34	4.8e-33	[-1]	Group09	6.22222	196	[AGL, AGTR1, AKT1, AR, ARAF, BCAR1, BCL2, BCL6, BRAF, BRAP, CAMK4, CASP3, CASP8, CASP9, CAV1, CBL, CBLB, CD19, CD36, CD44, CD55, CD79A, CD79B, CDC25A, CDC25C, CDK1, CENPC, CIITA, CPNE1, CREBBP, CRK, CSF1R, CSF2RB, CSK, CTNNB1, DGKZ, DLG4, DOK1, DOK3, DOK4, EEF2K, EGFR, ELK1, EP300, ETS1, EVL, EZH2, FASLG, FCER2, FCGR2A, FLT1, FYB, FYN, GRAP, GRB10, GRIN1, GRIN2A, GRIN2B, GRIN2D, HDAC1, HDAC2, HDA…
GO:0000097	Cross-presentation of soluble exogenous antigens (endosomes)	REACTOME_Pathways_01.03.2017	4.5e-40	1.9e-37	9.7e-34	4.8e-33	[-1]	Group09	6.22222	196	[AGL, AGTR1, AKT1, AR, ARAF, BCAR1, BCL2, BCL6, BRAF, BRAP, CAMK4, CASP3, CASP8, CASP9, CAV1, CBL, CBLB, CD19, CD36, CD44, CD55, CD79A, CD79B, CDC25A, CDC25C, CDK1, CENPC, CIITA, CPNE1, CREBBP, CRK, CSF1R, CSF2RB, CSK, CTNNB1, DGKZ, DLG4, DOK1, DOK3, DOK4, EEF2K, EGFR, ELK1, EP300, ETS1, EVL, EZH2, FASLG, FCER2, FCGR2A, FLT1, FYB, FYN, GRAP, GRB10, GRIN1, GRIN2A, GRIN2B, GRIN2D, HDAC1, HDAC2, HDA…
GO:0000111	Cytokine Signaling in Immune system	REACTOME_Pathways_01.03.2017	4.5e-40	1.9e-37	9.7e-34	4.8e-33	[-1]	Group09	6.22222	196	[AGL, AGTR1, AKT1, AR, ARAF, BCAR1, BCL2, BCL6, BRAF, BRAP, CAMK4, CASP3, CASP8, CASP9, CAV1, CBL, CBLB, CD19, CD36, CD44, CD55, CD79A, CD79B, CDC25A, CDC25C, CDK1, CENPC, CIITA, CPNE1, CREBBP, CRK, CSF1R, CSF2RB, CSK, CTNNB1, DGKZ, DLG4, DOK1, DOK3, DOK4, EEF2K, EGFR, ELK1, EP300, ETS1, EVL, EZH2, FASLG, FCER2, FCGR2A, FLT1, FYB, FYN, GRAP, GRB10, GRIN1, GRIN2A, GRIN2B, GRIN2D, HDAC1, HDAC2, HDA…
GO:0000163	Signaling by SCF-KIT	REACTOME_Pathways_01.03.2017	4.5e-40	1.9e-37	9.7e-34	4.8e-33	[-1]	Group09	6.22222	196	[AGL, AGTR1, AKT1, AR, ARAF, BCAR1, BCL2, BCL6, BRAF, BRAP, CAMK4, CASP3, CASP8, CASP9, CAV1, CBL, CBLB, CD19, CD36, CD44, CD55, CD79A, CD79B, CDC25A, CDC25C, CDK1, CENPC, CIITA, CPNE1, CREBBP, CRK, CSF1R, CSF2RB, CSK, CTNNB1, DGKZ, DLG4, DOK1, DOK3, DOK4, EEF2K, EGFR, ELK1, EP300, ETS1, EVL, EZH2, FASLG, FCER2, FCGR2A, FLT1, FYB, FYN, GRAP, GRB10, GRIN1, GRIN2A, GRIN2B, GRIN2D, HDAC1, HDAC2, HDA…
GO:0000242	Signal Transduction	REACTOME_Pathways_01.03.2017	9.2e-42	4e-39	9.7e-34	4.8e-33	[-1]	Group09	6.93261	179	[AGTR1, AKT1, AR, ARAF, ARHGAP33, BCAR1, BCL2, BRAF, BRAP, CAMK4, CASP3, CASP8, CASP9, CAV1, CBL, CD19, CD55, CDC25C, CDK1, CDK5, CENPC, CFLAR, CNTN1, CREBBP, CRK, CSF2RB, CSK, CTNNB1, DAPK3, DGKZ, DLG4, DOK1, EEF2K, EGFR, ELK1, EP300, EVL, FAS, FASLG, FCER2, FLT1, FNTA, FNTB, FYN, GRAP, GRB10, GRIN1, GRIN2A, GRIN2B, GRIN2D, HDAC1, HDAC2, HDAC3, HDAC4, HDAC5, HDAC6, HDAC9, HRAS, HSP90AA1, HSPB1, …
GO:0000255	Host Interactions of HIV factors	REACTOME_Pathways_01.03.2017	4.5e-40	1.9e-37	9.7e-34	4.8e-33	[-1]	Group09	6.22222	196	[AGL, AGTR1, AKT1, AR, ARAF, BCAR1, BCL2, BCL6, BRAF, BRAP, CAMK4, CASP3, CASP8, CASP9, CAV1, CBL, CBLB, CD19, CD36, CD44, CD55, CD79A, CD79B, CDC25A, CDC25C, CDK1, CENPC, CIITA, CPNE1, CREBBP, CRK, CSF1R, CSF2RB, CSK, CTNNB1, DGKZ, DLG4, DOK1, DOK3, DOK4, EEF2K, EGFR, ELK1, EP300, ETS1, EVL, EZH2, FASLG, FCER2, FCGR2A, FLT1, FYB, FYN, GRAP, GRB10, GRIN1, GRIN2A, GRIN2B, GRIN2D, HDAC1, HDAC2, HDA…
GO:0000315	Signalling to RAS	REACTOME_Pathways_01.03.2017	4.5e-40	1.9e-37	9.7e-34	4.8e-33	[-1]	Group09	6.22222	196	[AGL, AGTR1, AKT1, AR, ARAF, BCAR1, BCL2, BCL6, BRAF, BRAP, CAMK4, CASP3, CASP8, CASP9, CAV1, CBL, CBLB, CD19, CD36, CD44, CD55, CD79A, CD79B, CDC25A, CDC25C, CDK1, CENPC, CIITA, CPNE1, CREBBP, CRK, CSF1R, CSF2RB, CSK, CTNNB1, DGKZ, DLG4, DOK1, DOK3, DOK4, EEF2K, EGFR, ELK1, EP300, ETS1, EVL, EZH2, FASLG, FCER2, FCGR2A, FLT1, FYB, FYN, GRAP, GRB10, GRIN1, GRIN2A, GRIN2B, GRIN2D, HDAC1, HDAC2, HDA…
GO:0000342	Innate Immune System	REACTOME_Pathways_01.03.2017	4.5e-40	1.9e-37	9.7e-34	4.8e-33	[-1]	Group09	6.22222	196	[AGL, AGTR1, AKT1, AR, ARAF, BCAR1, BCL2, BCL6, BRAF, BRAP, CAMK4, CASP3, CASP8, CASP9, CAV1, CBL, CBLB, CD19, CD36, CD44, CD55, CD79A, CD79B, CDC25A, CDC25C, CDK1, CENPC, CIITA, CPNE1, CREBBP, CRK, CSF1R, CSF2RB, CSK, CTNNB1, DGKZ, DLG4, DOK1, DOK3, DOK4, EEF2K, EGFR, ELK1, EP300, ETS1, EVL, EZH2, FASLG, FCER2, FCGR2A, FLT1, FYB, FYN, GRAP, GRB10, GRIN1, GRIN2A, GRIN2B, GRIN2D, HDAC1, HDAC2, HDA…
GO:0000365	Prolonged ERK activation events	REACTOME_Pathways_01.03.2017	4.5e-40	1.9e-37	9.7e-34	4.8e-33	[-1]	Group09	6.22222	196	[AGL, AGTR1, AKT1, AR, ARAF, BCAR1, BCL2, BCL6, BRAF, BRAP, CAMK4, CASP3, CASP8, CASP9, CAV1, CBL, CBLB, CD19, CD36, CD44, CD55, CD79A, CD79B, CDC25A, CDC25C, CDK1, CENPC, CIITA, CPNE1, CREBBP, CRK, CSF1R, CSF2RB, CSK, CTNNB1, DGKZ, DLG4, DOK1, DOK3, DOK4, EEF2K, EGFR, ELK1, EP300, ETS1, EVL, EZH2, FASLG, FCER2, FCGR2A, FLT1, FYB, FYN, GRAP, GRB10, GRIN1, GRIN2A, GRIN2B, GRIN2D, HDAC1, HDAC2, HDA…
GO:0000366	Regulation of Apoptosis	REACTOME_Pathways_01.03.2017	9.2e-42	4e-39	9.7e-34	4.8e-33	[-1]	Group09	6.93261	179	[AGTR1, AKT1, AR, ARAF, ARHGAP33, BCAR1, BCL2, BRAF, BRAP, CAMK4, CASP3, CASP8, CASP9, CAV1, CBL, CD19, CD55, CDC25C, CDK1, CDK5, CENPC, CFLAR, CNTN1, CREBBP, CRK, CSF2RB, CSK, CTNNB1, DAPK3, DGKZ, DLG4, DOK1, EEF2K, EGFR, ELK1, EP300, EVL, FAS, FASLG, FCER2, FLT1, FNTA, FNTB, FYN, GRAP, GRB10, GRIN1, GRIN2A, GRIN2B, GRIN2D, HDAC1, HDAC2, HDAC3, HDAC4, HDAC5, HDAC6, HDAC9, HRAS, HSP90AA1, HSPB1, …
GO:0000372	Frs2-mediated activation	REACTOME_Pathways_01.03.2017	4.5e-40	1.9e-37	9.7e-34	4.8e-33	[-1]	Group09	6.22222	196	[AGL, AGTR1, AKT1, AR, ARAF, BCAR1, BCL2, BCL6, BRAF, BRAP, CAMK4, CASP3, CASP8, CASP9, CAV1, CBL, CBLB, CD19, CD36, CD44, CD55, CD79A, CD79B, CDC25A, CDC25C, CDK1, CENPC, CIITA, CPNE1, CREBBP, CRK, CSF1R, CSF2RB, CSK, CTNNB1, DGKZ, DLG4, DOK1, DOK3, DOK4, EEF2K, EGFR, ELK1, EP300, ETS1, EVL, EZH2, FASLG, FCER2, FCGR2A, FLT1, FYB, FYN, GRAP, GRB10, GRIN1, GRIN2A, GRIN2B, GRIN2D, HDAC1, HDAC2, HDA…
GO:0000373	ARMS-mediated activation	REACTOME_Pathways_01.03.2017	4.5e-40	1.9e-37	9.7e-34	4.8e-33	[-1]	Group09	6.22222	196	[AGL, AGTR1, AKT1, AR, ARAF, BCAR1, BCL2, BCL6, BRAF, BRAP, CAMK4, CASP3, CASP8, CASP9, CAV1, CBL, CBLB, CD19, CD36, CD44, CD55, CD79A, CD79B, CDC25A, CDC25C, CDK1, CENPC, CIITA, CPNE1, CREBBP, CRK, CSF1R, CSF2RB, CSK, CTNNB1, DGKZ, DLG4, DOK1, DOK3, DOK4, EEF2K, EGFR, ELK1, EP300, ETS1, EVL, EZH2, FASLG, FCER2, FCGR2A, FLT1, FYB, FYN, GRAP, GRB10, GRIN1, GRIN2A, GRIN2B, GRIN2D, HDAC1, HDAC2, HDA…
GO:0000385	SCF-beta-TrCP mediated degradation of Emi1	REACTOME_Pathways_01.03.2017	4.5e-40	1.9e-37	9.7e-34	4.8e-33	[-1]	Group09	6.22222	196	[AGL, AGTR1, AKT1, AR, ARAF, BCAR1, BCL2, BCL6, BRAF, BRAP, CAMK4, CASP3, CASP8, CASP9, CAV1, CBL, CBLB, CD19, CD36, CD44, CD55, CD79A, CD79B, CDC25A, CDC25C, CDK1, CENPC, CIITA, CPNE1, CREBBP, CRK, CSF1R, CSF2RB, CSK, CTNNB1, DGKZ, DLG4, DOK1, DOK3, DOK4, EEF2K, EGFR, ELK1, EP300, ETS1, EVL, EZH2, FASLG, FCER2, FCGR2A, FLT1, FYB, FYN, GRAP, GRB10, GRIN1, GRIN2A, GRIN2B, GRIN2D, HDAC1, HDAC2, HDA…
GO:0000386	APC/C-mediated degradation of cell cycle proteins	REACTOME_Pathways_01.03.2017	4.5e-40	1.9e-37	9.7e-34	4.8e-33	[-1]	Group09	6.22222	196	[AGL, AGTR1, AKT1, AR, ARAF, BCAR1, BCL2, BCL6, BRAF, BRAP, CAMK4, CASP3, CASP8, CASP9, CAV1, CBL, CBLB, CD19, CD36, CD44, CD55, CD79A, CD79B, CDC25A, CDC25C, CDK1, CENPC, CIITA, CPNE1, CREBBP, CRK, CSF1R, CSF2RB, CSK, CTNNB1, DGKZ, DLG4, DOK1, DOK3, DOK4, EEF2K, EGFR, ELK1, EP300, ETS1, EVL, EZH2, FASLG, FCER2, FCGR2A, FLT1, FYB, FYN, GRAP, GRB10, GRIN1, GRIN2A, GRIN2B, GRIN2D, HDAC1, HDAC2, HDA…
GO:0000387	APC/C:Cdc20 mediated degradation of Securin	REACTOME_Pathways_01.03.2017	4.5e-40	1.9e-37	9.7e-34	4.8e-33	[-1]	Group09	6.22222	196	[AGL, AGTR1, AKT1, AR, ARAF, BCAR1, BCL2, BCL6, BRAF, BRAP, CAMK4, CASP3, CASP8, CASP9, CAV1, CBL, CBLB, CD19, CD36, CD44, CD55, CD79A, CD79B, CDC25A, CDC25C, CDK1, CENPC, CIITA, CPNE1, CREBBP, CRK, CSF1R, CSF2RB, CSK, CTNNB1, DGKZ, DLG4, DOK1, DOK3, DOK4, EEF2K, EGFR, ELK1, EP300, ETS1, EVL, EZH2, FASLG, FCER2, FCGR2A, FLT1, FYB, FYN, GRAP, GRB10, GRIN1, GRIN2A, GRIN2B, GRIN2D, HDAC1, HDAC2, HDA…
GO:0000388	APC/C:Cdh1 mediated degradation of Cdc20 and other APC/C:Cdh1 targeted proteins in late mitosis/early G1	REACTOME_Pathways_01.03.2017	4.5e-40	1.9e-37	9.7e-34	4.8e-33	[-1]	Group09	6.22222	196	[AGL, AGTR1, AKT1, AR, ARAF, BCAR1, BCL2, BCL6, BRAF, BRAP, CAMK4, CASP3, CASP8, CASP9, CAV1, CBL, CBLB, CD19, CD36, CD44, CD55, CD79A, CD79B, CDC25A, CDC25C, CDK1, CENPC, CIITA, CPNE1, CREBBP, CRK, CSF1R, CSF2RB, CSK, CTNNB1, DGKZ, DLG4, DOK1, DOK3, DOK4, EEF2K, EGFR, ELK1, EP300, ETS1, EVL, EZH2, FASLG, FCER2, FCGR2A, FLT1, FYB, FYN, GRAP, GRB10, GRIN1, GRIN2A, GRIN2B, GRIN2D, HDAC1, HDAC2, HDA…
GO:0000389	Cdc20:Phospho-APC/C mediated degradation of Cyclin A	REACTOME_Pathways_01.03.2017	4.5e-40	1.9e-37	9.7e-34	4.8e-33	[-1]	Group09	6.22222	196	[AGL, AGTR1, AKT1, AR, ARAF, BCAR1, BCL2, BCL6, BRAF, BRAP, CAMK4, CASP3, CASP8, CASP9, CAV1, CBL, CBLB, CD19, CD36, CD44, CD55, CD79A, CD79B, CDC25A, CDC25C, CDK1, CENPC, CIITA, CPNE1, CREBBP, CRK, CSF1R, CSF2RB, CSK, CTNNB1, DGKZ, DLG4, DOK1, DOK3, DOK4, EEF2K, EGFR, ELK1, EP300, ETS1, EVL, EZH2, FASLG, FCER2, FCGR2A, FLT1, FYB, FYN, GRAP, GRB10, GRIN1, GRIN2A, GRIN2B, GRIN2D, HDAC1, HDAC2, HDA…
GO:0000408	Regulation of APC/C activators between G1/S and early anaphase	REACTOME_Pathways_01.03.2017	4.5e-40	1.9e-37	9.7e-34	4.8e-33	[-1]	Group09	6.22222	196	[AGL, AGTR1, AKT1, AR, ARAF, BCAR1, BCL2, BCL6, BRAF, BRAP, CAMK4, CASP3, CASP8, CASP9, CAV1, CBL, CBLB, CD19, CD36, CD44, CD55, CD79A, CD79B, CDC25A, CDC25C, CDK1, CENPC, CIITA, CPNE1, CREBBP, CRK, CSF1R, CSF2RB, CSK, CTNNB1, DGKZ, DLG4, DOK1, DOK3, DOK4, EEF2K, EGFR, ELK1, EP300, ETS1, EVL, EZH2, FASLG, FCER2, FCGR2A, FLT1, FYB, FYN, GRAP, GRB10, GRIN1, GRIN2A, GRIN2B, GRIN2D, HDAC1, HDAC2, HDA…
GO:0000409	APC/C:Cdc20 mediated degradation of mitotic proteins	REACTOME_Pathways_01.03.2017	4.5e-40	1.9e-37	9.7e-34	4.8e-33	[-1]	Group09	6.22222	196	[AGL, AGTR1, AKT1, AR, ARAF, BCAR1, BCL2, BCL6, BRAF, BRAP, CAMK4, CASP3, CASP8, CASP9, CAV1, CBL, CBLB, CD19, CD36, CD44, CD55, CD79A, CD79B, CDC25A, CDC25C, CDK1, CENPC, CIITA, CPNE1, CREBBP, CRK, CSF1R, CSF2RB, CSK, CTNNB1, DGKZ, DLG4, DOK1, DOK3, DOK4, EEF2K, EGFR, ELK1, EP300, ETS1, EVL, EZH2, FASLG, FCER2, FCGR2A, FLT1, FYB, FYN, GRAP, GRB10, GRIN1, GRIN2A, GRIN2B, GRIN2D, HDAC1, HDAC2, HDA…
GO:0000412	Activation of APC/C and APC/C:Cdc20 mediated degradation of mitotic proteins	REACTOME_Pathways_01.03.2017	4.5e-40	1.9e-37	9.7e-34	4.8e-33	[-1]	Group09	6.22222	196	[AGL, AGTR1, AKT1, AR, ARAF, BCAR1, BCL2, BCL6, BRAF, BRAP, CAMK4, CASP3, CASP8, CASP9, CAV1, CBL, CBLB, CD19, CD36, CD44, CD55, CD79A, CD79B, CDC25A, CDC25C, CDK1, CENPC, CIITA, CPNE1, CREBBP, CRK, CSF1R, CSF2RB, CSK, CTNNB1, DGKZ, DLG4, DOK1, DOK3, DOK4, EEF2K, EGFR, ELK1, EP300, ETS1, EVL, EZH2, FASLG, FCER2, FCGR2A, FLT1, FYB, FYN, GRAP, GRB10, GRIN1, GRIN2A, GRIN2B, GRIN2D, HDAC1, HDAC2, HDA…
GO:0000420	Signaling by EGFR	REACTOME_Pathways_01.03.2017	4.5e-40	1.9e-37	9.7e-34	4.8e-33	[-1]	Group09	6.22222	196	[AGL, AGTR1, AKT1, AR, ARAF, BCAR1, BCL2, BCL6, BRAF, BRAP, CAMK4, CASP3, CASP8, CASP9, CAV1, CBL, CBLB, CD19, CD36, CD44, CD55, CD79A, CD79B, CDC25A, CDC25C, CDK1, CENPC, CIITA, CPNE1, CREBBP, CRK, CSF1R, CSF2RB, CSK, CTNNB1, DGKZ, DLG4, DOK1, DOK3, DOK4, EEF2K, EGFR, ELK1, EP300, ETS1, EVL, EZH2, FASLG, FCER2, FCGR2A, FLT1, FYB, FYN, GRAP, GRB10, GRIN1, GRIN2A, GRIN2B, GRIN2D, HDAC1, HDAC2, HDA…
GO:0000423	APC:Cdc20 mediated degradation of cell cycle proteins prior to satisfation of the cell cycle checkpoint	REACTOME_Pathways_01.03.2017	4.5e-40	1.9e-37	9.7e-34	4.8e-33	[-1]	Group09	6.22222	196	[AGL, AGTR1, AKT1, AR, ARAF, BCAR1, BCL2, BCL6, BRAF, BRAP, CAMK4, CASP3, CASP8, CASP9, CAV1, CBL, CBLB, CD19, CD36, CD44, CD55, CD79A, CD79B, CDC25A, CDC25C, CDK1, CENPC, CIITA, CPNE1, CREBBP, CRK, CSF1R, CSF2RB, CSK, CTNNB1, DGKZ, DLG4, DOK1, DOK3, DOK4, EEF2K, EGFR, ELK1, EP300, ETS1, EVL, EZH2, FASLG, FCER2, FCGR2A, FLT1, FYB, FYN, GRAP, GRB10, GRIN1, GRIN2A, GRIN2B, GRIN2D, HDAC1, HDAC2, HDA…
GO:0000424	GRB2 events in EGFR signaling	REACTOME_Pathways_01.03.2017	4.5e-40	1.9e-37	9.7e-34	4.8e-33	[-1]	Group09	6.22222	196	[AGL, AGTR1, AKT1, AR, ARAF, BCAR1, BCL2, BCL6, BRAF, BRAP, CAMK4, CASP3, CASP8, CASP9, CAV1, CBL, CBLB, CD19, CD36, CD44, CD55, CD79A, CD79B, CDC25A, CDC25C, CDK1, CENPC, CIITA, CPNE1, CREBBP, CRK, CSF1R, CSF2RB, CSK, CTNNB1, DGKZ, DLG4, DOK1, DOK3, DOK4, EEF2K, EGFR, ELK1, EP300, ETS1, EVL, EZH2, FASLG, FCER2, FCGR2A, FLT1, FYB, FYN, GRAP, GRB10, GRIN1, GRIN2A, GRIN2B, GRIN2D, HDAC1, HDAC2, HDA…
GO:0000428	SHC1 events in EGFR signaling	REACTOME_Pathways_01.03.2017	4.5e-40	1.9e-37	9.7e-34	4.8e-33	[-1]	Group09	6.22222	196	[AGL, AGTR1, AKT1, AR, ARAF, BCAR1, BCL2, BCL6, BRAF, BRAP, CAMK4, CASP3, CASP8, CASP9, CAV1, CBL, CBLB, CD19, CD36, CD44, CD55, CD79A, CD79B, CDC25A, CDC25C, CDK1, CENPC, CIITA, CPNE1, CREBBP, CRK, CSF1R, CSF2RB, CSK, CTNNB1, DGKZ, DLG4, DOK1, DOK3, DOK4, EEF2K, EGFR, ELK1, EP300, ETS1, EVL, EZH2, FASLG, FCER2, FCGR2A, FLT1, FYB, FYN, GRAP, GRB10, GRIN1, GRIN2A, GRIN2B, GRIN2D, HDAC1, HDAC2, HDA…
GO:0000429	Vpu mediated degradation of CD4	REACTOME_Pathways_01.03.2017	4.5e-40	1.9e-37	9.7e-34	4.8e-33	[-1]	Group09	6.22222	196	[AGL, AGTR1, AKT1, AR, ARAF, BCAR1, BCL2, BCL6, BRAF, BRAP, CAMK4, CASP3, CASP8, CASP9, CAV1, CBL, CBLB, CD19, CD36, CD44, CD55, CD79A, CD79B, CDC25A, CDC25C, CDK1, CENPC, CIITA, CPNE1, CREBBP, CRK, CSF1R, CSF2RB, CSK, CTNNB1, DGKZ, DLG4, DOK1, DOK3, DOK4, EEF2K, EGFR, ELK1, EP300, ETS1, EVL, EZH2, FASLG, FCER2, FCGR2A, FLT1, FYB, FYN, GRAP, GRB10, GRIN1, GRIN2A, GRIN2B, GRIN2D, HDAC1, HDAC2, HDA…
GO:0000430	Vif-mediated degradation of APOBEC3G	REACTOME_Pathways_01.03.2017	4.5e-40	1.9e-37	9.7e-34	4.8e-33	[-1]	Group09	6.22222	196	[AGL, AGTR1, AKT1, AR, ARAF, BCAR1, BCL2, BCL6, BRAF, BRAP, CAMK4, CASP3, CASP8, CASP9, CAV1, CBL, CBLB, CD19, CD36, CD44, CD55, CD79A, CD79B, CDC25A, CDC25C, CDK1, CENPC, CIITA, CPNE1, CREBBP, CRK, CSF1R, CSF2RB, CSK, CTNNB1, DGKZ, DLG4, DOK1, DOK3, DOK4, EEF2K, EGFR, ELK1, EP300, ETS1, EVL, EZH2, FASLG, FCER2, FCGR2A, FLT1, FYB, FYN, GRAP, GRB10, GRIN1, GRIN2A, GRIN2B, GRIN2D, HDAC1, HDAC2, HDA…
GO:0000458	Downstream signal transduction	REACTOME_Pathways_01.03.2017	4.5e-40	1.9e-37	9.7e-34	4.8e-33	[-1]	Group09	6.22222	196	[AGL, AGTR1, AKT1, AR, ARAF, BCAR1, BCL2, BCL6, BRAF, BRAP, CAMK4, CASP3, CASP8, CASP9, CAV1, CBL, CBLB, CD19, CD36, CD44, CD55, CD79A, CD79B, CDC25A, CDC25C, CDK1, CENPC, CIITA, CPNE1, CREBBP, CRK, CSF1R, CSF2RB, CSK, CTNNB1, DGKZ, DLG4, DOK1, DOK3, DOK4, EEF2K, EGFR, ELK1, EP300, ETS1, EVL, EZH2, FASLG, FCER2, FCGR2A, FLT1, FYB, FYN, GRAP, GRB10, GRIN1, GRIN2A, GRIN2B, GRIN2D, HDAC1, HDAC2, HDA…
GO:0000459	Signaling by PDGF	REACTOME_Pathways_01.03.2017	4.5e-40	1.9e-37	9.7e-34	4.8e-33	[-1]	Group09	6.22222	196	[AGL, AGTR1, AKT1, AR, ARAF, BCAR1, BCL2, BCL6, BRAF, BRAP, CAMK4, CASP3, CASP8, CASP9, CAV1, CBL, CBLB, CD19, CD36, CD44, CD55, CD79A, CD79B, CDC25A, CDC25C, CDK1, CENPC, CIITA, CPNE1, CREBBP, CRK, CSF1R, CSF2RB, CSK, CTNNB1, DGKZ, DLG4, DOK1, DOK3, DOK4, EEF2K, EGFR, ELK1, EP300, ETS1, EVL, EZH2, FASLG, FCER2, FCGR2A, FLT1, FYB, FYN, GRAP, GRB10, GRIN1, GRIN2A, GRIN2B, GRIN2D, HDAC1, HDAC2, HDA…
GO:0000462	NGF signalling via TRKA from the plasma membrane	REACTOME_Pathways_01.03.2017	4.5e-40	1.9e-37	9.7e-34	4.8e-33	[-1]	Group09	6.22222	196	[AGL, AGTR1, AKT1, AR, ARAF, BCAR1, BCL2, BCL6, BRAF, BRAP, CAMK4, CASP3, CASP8, CASP9, CAV1, CBL, CBLB, CD19, CD36, CD44, CD55, CD79A, CD79B, CDC25A, CDC25C, CDK1, CENPC, CIITA, CPNE1, CREBBP, CRK, CSF1R, CSF2RB, CSK, CTNNB1, DGKZ, DLG4, DOK1, DOK3, DOK4, EEF2K, EGFR, ELK1, EP300, ETS1, EVL, EZH2, FASLG, FCER2, FCGR2A, FLT1, FYB, FYN, GRAP, GRB10, GRIN1, GRIN2A, GRIN2B, GRIN2D, HDAC1, HDAC2, HDA…
GO:0000465	Signalling to ERKs	REACTOME_Pathways_01.03.2017	4.5e-40	1.9e-37	9.7e-34	4.8e-33	[-1]	Group09	6.22222	196	[AGL, AGTR1, AKT1, AR, ARAF, BCAR1, BCL2, BCL6, BRAF, BRAP, CAMK4, CASP3, CASP8, CASP9, CAV1, CBL, CBLB, CD19, CD36, CD44, CD55, CD79A, CD79B, CDC25A, CDC25C, CDK1, CENPC, CIITA, CPNE1, CREBBP, CRK, CSF1R, CSF2RB, CSK, CTNNB1, DGKZ, DLG4, DOK1, DOK3, DOK4, EEF2K, EGFR, ELK1, EP300, ETS1, EVL, EZH2, FASLG, FCER2, FCGR2A, FLT1, FYB, FYN, GRAP, GRB10, GRIN1, GRIN2A, GRIN2B, GRIN2D, HDAC1, HDAC2, HDA…
GO:0000466	Signalling to p38 via RIT and RIN	REACTOME_Pathways_01.03.2017	4.5e-40	1.9e-37	9.7e-34	4.8e-33	[-1]	Group09	6.22222	196	[AGL, AGTR1, AKT1, AR, ARAF, BCAR1, BCL2, BCL6, BRAF, BRAP, CAMK4, CASP3, CASP8, CASP9, CAV1, CBL, CBLB, CD19, CD36, CD44, CD55, CD79A, CD79B, CDC25A, CDC25C, CDK1, CENPC, CIITA, CPNE1, CREBBP, CRK, CSF1R, CSF2RB, CSK, CTNNB1, DGKZ, DLG4, DOK1, DOK3, DOK4, EEF2K, EGFR, ELK1, EP300, ETS1, EVL, EZH2, FASLG, FCER2, FCGR2A, FLT1, FYB, FYN, GRAP, GRB10, GRIN1, GRIN2A, GRIN2B, GRIN2D, HDAC1, HDAC2, HDA…
GO:0000519	Signaling by VEGF	REACTOME_Pathways_01.03.2017	4.5e-40	1.9e-37	9.7e-34	4.8e-33	[-1]	Group09	6.22222	196	[AGL, AGTR1, AKT1, AR, ARAF, BCAR1, BCL2, BCL6, BRAF, BRAP, CAMK4, CASP3, CASP8, CASP9, CAV1, CBL, CBLB, CD19, CD36, CD44, CD55, CD79A, CD79B, CDC25A, CDC25C, CDK1, CENPC, CIITA, CPNE1, CREBBP, CRK, CSF1R, CSF2RB, CSK, CTNNB1, DGKZ, DLG4, DOK1, DOK3, DOK4, EEF2K, EGFR, ELK1, EP300, ETS1, EVL, EZH2, FASLG, FCER2, FCGR2A, FLT1, FYB, FYN, GRAP, GRB10, GRIN1, GRIN2A, GRIN2B, GRIN2D, HDAC1, HDAC2, HDA…
GO:0000523	Signaling by Rho GTPases	REACTOME_Pathways_01.03.2017	9.2e-42	4e-39	9.7e-34	4.8e-33	[-1]	Group09	6.93261	179	[AGTR1, AKT1, AR, ARAF, ARHGAP33, BCAR1, BCL2, BRAF, BRAP, CAMK4, CASP3, CASP8, CASP9, CAV1, CBL, CD19, CD55, CDC25C, CDK1, CDK5, CENPC, CFLAR, CNTN1, CREBBP, CRK, CSF2RB, CSK, CTNNB1, DAPK3, DGKZ, DLG4, DOK1, EEF2K, EGFR, ELK1, EP300, EVL, FAS, FASLG, FCER2, FLT1, FNTA, FNTB, FYN, GRAP, GRB10, GRIN1, GRIN2A, GRIN2B, GRIN2D, HDAC1, HDAC2, HDAC3, HDAC4, HDAC5, HDAC6, HDAC9, HRAS, HSP90AA1, HSPB1, …
GO:0000525	Rho GTPase cycle	REACTOME_Pathways_01.03.2017	9.2e-42	4e-39	9.7e-34	4.8e-33	[-1]	Group09	6.93261	179	[AGTR1, AKT1, AR, ARAF, ARHGAP33, BCAR1, BCL2, BRAF, BRAP, CAMK4, CASP3, CASP8, CASP9, CAV1, CBL, CD19, CD55, CDC25C, CDK1, CDK5, CENPC, CFLAR, CNTN1, CREBBP, CRK, CSF2RB, CSK, CTNNB1, DAPK3, DGKZ, DLG4, DOK1, EEF2K, EGFR, ELK1, EP300, EVL, FAS, FASLG, FCER2, FLT1, FNTA, FNTB, FYN, GRAP, GRB10, GRIN1, GRIN2A, GRIN2B, GRIN2D, HDAC1, HDAC2, HDAC3, HDAC4, HDAC5, HDAC6, HDAC9, HRAS, HSP90AA1, HSPB1, …
GO:0000526	Degradation of beta-catenin by the destruction complex	REACTOME_Pathways_01.03.2017	4.5e-40	1.9e-37	9.7e-34	4.8e-33	[-1]	Group09	6.22222	196	[AGL, AGTR1, AKT1, AR, ARAF, BCAR1, BCL2, BCL6, BRAF, BRAP, CAMK4, CASP3, CASP8, CASP9, CAV1, CBL, CBLB, CD19, CD36, CD44, CD55, CD79A, CD79B, CDC25A, CDC25C, CDK1, CENPC, CIITA, CPNE1, CREBBP, CRK, CSF1R, CSF2RB, CSK, CTNNB1, DGKZ, DLG4, DOK1, DOK3, DOK4, EEF2K, EGFR, ELK1, EP300, ETS1, EVL, EZH2, FASLG, FCER2, FCGR2A, FLT1, FYB, FYN, GRAP, GRB10, GRIN1, GRIN2A, GRIN2B, GRIN2D, HDAC1, HDAC2, HDA…
GO:0000529	Signaling by Wnt	REACTOME_Pathways_01.03.2017	4.5e-40	1.9e-37	9.7e-34	4.8e-33	[-1]	Group09	6.22222	196	[AGL, AGTR1, AKT1, AR, ARAF, BCAR1, BCL2, BCL6, BRAF, BRAP, CAMK4, CASP3, CASP8, CASP9, CAV1, CBL, CBLB, CD19, CD36, CD44, CD55, CD79A, CD79B, CDC25A, CDC25C, CDK1, CENPC, CIITA, CPNE1, CREBBP, CRK, CSF1R, CSF2RB, CSK, CTNNB1, DGKZ, DLG4, DOK1, DOK3, DOK4, EEF2K, EGFR, ELK1, EP300, ETS1, EVL, EZH2, FASLG, FCER2, FCGR2A, FLT1, FYB, FYN, GRAP, GRB10, GRIN1, GRIN2A, GRIN2B, GRIN2D, HDAC1, HDAC2, HDA…
GO:0000570	TCF dependent signaling in response to WNT	REACTOME_Pathways_01.03.2017	4.5e-40	1.9e-37	9.7e-34	4.8e-33	[-1]	Group09	6.22222	196	[AGL, AGTR1, AKT1, AR, ARAF, BCAR1, BCL2, BCL6, BRAF, BRAP, CAMK4, CASP3, CASP8, CASP9, CAV1, CBL, CBLB, CD19, CD36, CD44, CD55, CD79A, CD79B, CDC25A, CDC25C, CDK1, CENPC, CIITA, CPNE1, CREBBP, CRK, CSF1R, CSF2RB, CSK, CTNNB1, DGKZ, DLG4, DOK1, DOK3, DOK4, EEF2K, EGFR, ELK1, EP300, ETS1, EVL, EZH2, FASLG, FCER2, FCGR2A, FLT1, FYB, FYN, GRAP, GRB10, GRIN1, GRIN2A, GRIN2B, GRIN2D, HDAC1, HDAC2, HDA…
GO:0000583	TCR signaling	REACTOME_Pathways_01.03.2017	4.5e-40	1.9e-37	9.7e-34	4.8e-33	[-1]	Group09	6.22222	196	[AGL, AGTR1, AKT1, AR, ARAF, BCAR1, BCL2, BCL6, BRAF, BRAP, CAMK4, CASP3, CASP8, CASP9, CAV1, CBL, CBLB, CD19, CD36, CD44, CD55, CD79A, CD79B, CDC25A, CDC25C, CDK1, CENPC, CIITA, CPNE1, CREBBP, CRK, CSF1R, CSF2RB, CSK, CTNNB1, DGKZ, DLG4, DOK1, DOK3, DOK4, EEF2K, EGFR, ELK1, EP300, ETS1, EVL, EZH2, FASLG, FCER2, FCGR2A, FLT1, FYB, FYN, GRAP, GRB10, GRIN1, GRIN2A, GRIN2B, GRIN2D, HDAC1, HDAC2, HDA…
GO:0000586	Downstream TCR signaling	REACTOME_Pathways_01.03.2017	4.5e-40	1.9e-37	9.7e-34	4.8e-33	[-1]	Group09	6.22222	196	[AGL, AGTR1, AKT1, AR, ARAF, BCAR1, BCL2, BCL6, BRAF, BRAP, CAMK4, CASP3, CASP8, CASP9, CAV1, CBL, CBLB, CD19, CD36, CD44, CD55, CD79A, CD79B, CDC25A, CDC25C, CDK1, CENPC, CIITA, CPNE1, CREBBP, CRK, CSF1R, CSF2RB, CSK, CTNNB1, DGKZ, DLG4, DOK1, DOK3, DOK4, EEF2K, EGFR, ELK1, EP300, ETS1, EVL, EZH2, FASLG, FCER2, FCGR2A, FLT1, FYB, FYN, GRAP, GRB10, GRIN1, GRIN2A, GRIN2B, GRIN2D, HDAC1, HDAC2, HDA…
GO:0000637	Regulation of PAK-2p34 activity by PS-GAP/RHG10	REACTOME_Pathways_01.03.2017	9.2e-42	4e-39	9.7e-34	4.8e-33	[-1]	Group09	6.93261	179	[AGTR1, AKT1, AR, ARAF, ARHGAP33, BCAR1, BCL2, BRAF, BRAP, CAMK4, CASP3, CASP8, CASP9, CAV1, CBL, CD19, CD55, CDC25C, CDK1, CDK5, CENPC, CFLAR, CNTN1, CREBBP, CRK, CSF2RB, CSK, CTNNB1, DAPK3, DGKZ, DLG4, DOK1, EEF2K, EGFR, ELK1, EP300, EVL, FAS, FASLG, FCER2, FLT1, FNTA, FNTB, FYN, GRAP, GRB10, GRIN1, GRIN2A, GRIN2B, GRIN2D, HDAC1, HDAC2, HDAC3, HDAC4, HDAC5, HDAC6, HDAC9, HRAS, HSP90AA1, HSPB1, …
GO:0000638	Regulation of activated PAK-2p34 by proteasome mediated degradation	REACTOME_Pathways_01.03.2017	4.5e-40	1.9e-37	9.7e-34	4.8e-33	[-1]	Group09	6.22222	196	[AGL, AGTR1, AKT1, AR, ARAF, BCAR1, BCL2, BCL6, BRAF, BRAP, CAMK4, CASP3, CASP8, CASP9, CAV1, CBL, CBLB, CD19, CD36, CD44, CD55, CD79A, CD79B, CDC25A, CDC25C, CDK1, CENPC, CIITA, CPNE1, CREBBP, CRK, CSF1R, CSF2RB, CSK, CTNNB1, DGKZ, DLG4, DOK1, DOK3, DOK4, EEF2K, EGFR, ELK1, EP300, ETS1, EVL, EZH2, FASLG, FCER2, FCGR2A, FLT1, FYB, FYN, GRAP, GRB10, GRIN1, GRIN2A, GRIN2B, GRIN2D, HDAC1, HDAC2, HDA…
GO:0000682	DAP12 interactions	REACTOME_Pathways_01.03.2017	4.5e-40	1.9e-37	9.7e-34	4.8e-33	[-1]	Group09	6.22222	196	[AGL, AGTR1, AKT1, AR, ARAF, BCAR1, BCL2, BCL6, BRAF, BRAP, CAMK4, CASP3, CASP8, CASP9, CAV1, CBL, CBLB, CD19, CD36, CD44, CD55, CD79A, CD79B, CDC25A, CDC25C, CDK1, CENPC, CIITA, CPNE1, CREBBP, CRK, CSF1R, CSF2RB, CSK, CTNNB1, DGKZ, DLG4, DOK1, DOK3, DOK4, EEF2K, EGFR, ELK1, EP300, ETS1, EVL, EZH2, FASLG, FCER2, FCGR2A, FLT1, FYB, FYN, GRAP, GRB10, GRIN1, GRIN2A, GRIN2B, GRIN2D, HDAC1, HDAC2, HDA…
GO:0000699	Cellular response to hypoxia	REACTOME_Pathways_01.03.2017	4.5e-40	1.9e-37	9.7e-34	4.8e-33	[-1]	Group09	6.22222	196	[AGL, AGTR1, AKT1, AR, ARAF, BCAR1, BCL2, BCL6, BRAF, BRAP, CAMK4, CASP3, CASP8, CASP9, CAV1, CBL, CBLB, CD19, CD36, CD44, CD55, CD79A, CD79B, CDC25A, CDC25C, CDK1, CENPC, CIITA, CPNE1, CREBBP, CRK, CSF1R, CSF2RB, CSK, CTNNB1, DGKZ, DLG4, DOK1, DOK3, DOK4, EEF2K, EGFR, ELK1, EP300, ETS1, EVL, EZH2, FASLG, FCER2, FCGR2A, FLT1, FYB, FYN, GRAP, GRB10, GRIN1, GRIN2A, GRIN2B, GRIN2D, HDAC1, HDAC2, HDA…
GO:0000700	Cellular responses to stress	REACTOME_Pathways_01.03.2017	4.5e-40	1.9e-37	9.7e-34	4.8e-33	[-1]	Group09	6.22222	196	[AGL, AGTR1, AKT1, AR, ARAF, BCAR1, BCL2, BCL6, BRAF, BRAP, CAMK4, CASP3, CASP8, CASP9, CAV1, CBL, CBLB, CD19, CD36, CD44, CD55, CD79A, CD79B, CDC25A, CDC25C, CDK1, CENPC, CIITA, CPNE1, CREBBP, CRK, CSF1R, CSF2RB, CSK, CTNNB1, DGKZ, DLG4, DOK1, DOK3, DOK4, EEF2K, EGFR, ELK1, EP300, ETS1, EVL, EZH2, FASLG, FCER2, FCGR2A, FLT1, FYB, FYN, GRAP, GRB10, GRIN1, GRIN2A, GRIN2B, GRIN2D, HDAC1, HDAC2, HDA…
GO:0000704	Signaling by Type 1 Insulin-like Growth Factor 1 Receptor (IGF1R)	REACTOME_Pathways_01.03.2017	4.5e-40	1.9e-37	9.7e-34	4.8e-33	[-1]	Group09	6.22222	196	[AGL, AGTR1, AKT1, AR, ARAF, BCAR1, BCL2, BCL6, BRAF, BRAP, CAMK4, CASP3, CASP8, CASP9, CAV1, CBL, CBLB, CD19, CD36, CD44, CD55, CD79A, CD79B, CDC25A, CDC25C, CDK1, CENPC, CIITA, CPNE1, CREBBP, CRK, CSF1R, CSF2RB, CSK, CTNNB1, DGKZ, DLG4, DOK1, DOK3, DOK4, EEF2K, EGFR, ELK1, EP300, ETS1, EVL, EZH2, FASLG, FCER2, FCGR2A, FLT1, FYB, FYN, GRAP, GRB10, GRIN1, GRIN2A, GRIN2B, GRIN2D, HDAC1, HDAC2, HDA…
GO:0000711	DAP12 signaling	REACTOME_Pathways_01.03.2017	4.5e-40	1.9e-37	9.7e-34	4.8e-33	[-1]	Group09	6.22222	196	[AGL, AGTR1, AKT1, AR, ARAF, BCAR1, BCL2, BCL6, BRAF, BRAP, CAMK4, CASP3, CASP8, CASP9, CAV1, CBL, CBLB, CD19, CD36, CD44, CD55, CD79A, CD79B, CDC25A, CDC25C, CDK1, CENPC, CIITA, CPNE1, CREBBP, CRK, CSF1R, CSF2RB, CSK, CTNNB1, DGKZ, DLG4, DOK1, DOK3, DOK4, EEF2K, EGFR, ELK1, EP300, ETS1, EVL, EZH2, FASLG, FCER2, FCGR2A, FLT1, FYB, FYN, GRAP, GRB10, GRIN1, GRIN2A, GRIN2B, GRIN2D, HDAC1, HDAC2, HDA…
GO:0000713	IGF1R signaling cascade	REACTOME_Pathways_01.03.2017	4.5e-40	1.9e-37	9.7e-34	4.8e-33	[-1]	Group09	6.22222	196	[AGL, AGTR1, AKT1, AR, ARAF, BCAR1, BCL2, BCL6, BRAF, BRAP, CAMK4, CASP3, CASP8, CASP9, CAV1, CBL, CBLB, CD19, CD36, CD44, CD55, CD79A, CD79B, CDC25A, CDC25C, CDK1, CENPC, CIITA, CPNE1, CREBBP, CRK, CSF1R, CSF2RB, CSK, CTNNB1, DGKZ, DLG4, DOK1, DOK3, DOK4, EEF2K, EGFR, ELK1, EP300, ETS1, EVL, EZH2, FASLG, FCER2, FCGR2A, FLT1, FYB, FYN, GRAP, GRB10, GRIN1, GRIN2A, GRIN2B, GRIN2D, HDAC1, HDAC2, HDA…
GO:0000714	IRS-related events triggered by IGF1R	REACTOME_Pathways_01.03.2017	4.5e-40	1.9e-37	9.7e-34	4.8e-33	[-1]	Group09	6.22222	196	[AGL, AGTR1, AKT1, AR, ARAF, BCAR1, BCL2, BCL6, BRAF, BRAP, CAMK4, CASP3, CASP8, CASP9, CAV1, CBL, CBLB, CD19, CD36, CD44, CD55, CD79A, CD79B, CDC25A, CDC25C, CDK1, CENPC, CIITA, CPNE1, CREBBP, CRK, CSF1R, CSF2RB, CSK, CTNNB1, DGKZ, DLG4, DOK1, DOK3, DOK4, EEF2K, EGFR, ELK1, EP300, ETS1, EVL, EZH2, FASLG, FCER2, FCGR2A, FLT1, FYB, FYN, GRAP, GRB10, GRIN1, GRIN2A, GRIN2B, GRIN2D, HDAC1, HDAC2, HDA…
GO:0000718	Fc epsilon receptor (FCERI) signaling	REACTOME_Pathways_01.03.2017	4.5e-40	1.9e-37	9.7e-34	4.8e-33	[-1]	Group09	6.22222	196	[AGL, AGTR1, AKT1, AR, ARAF, BCAR1, BCL2, BCL6, BRAF, BRAP, CAMK4, CASP3, CASP8, CASP9, CAV1, CBL, CBLB, CD19, CD36, CD44, CD55, CD79A, CD79B, CDC25A, CDC25C, CDK1, CENPC, CIITA, CPNE1, CREBBP, CRK, CSF1R, CSF2RB, CSK, CTNNB1, DGKZ, DLG4, DOK1, DOK3, DOK4, EEF2K, EGFR, ELK1, EP300, ETS1, EVL, EZH2, FASLG, FCER2, FCGR2A, FLT1, FYB, FYN, GRAP, GRB10, GRIN1, GRIN2A, GRIN2B, GRIN2D, HDAC1, HDAC2, HDA…
GO:0000721	Separation of Sister Chromatids	REACTOME_Pathways_01.03.2017	4.5e-40	1.9e-37	9.7e-34	4.8e-33	[-1]	Group09	6.22222	196	[AGL, AGTR1, AKT1, AR, ARAF, BCAR1, BCL2, BCL6, BRAF, BRAP, CAMK4, CASP3, CASP8, CASP9, CAV1, CBL, CBLB, CD19, CD36, CD44, CD55, CD79A, CD79B, CDC25A, CDC25C, CDK1, CENPC, CIITA, CPNE1, CREBBP, CRK, CSF1R, CSF2RB, CSK, CTNNB1, DGKZ, DLG4, DOK1, DOK3, DOK4, EEF2K, EGFR, ELK1, EP300, ETS1, EVL, EZH2, FASLG, FCER2, FCGR2A, FLT1, FYB, FYN, GRAP, GRB10, GRIN1, GRIN2A, GRIN2B, GRIN2D, HDAC1, HDAC2, HDA…
GO:0000732	Mitotic Metaphase and Anaphase	REACTOME_Pathways_01.03.2017	4.5e-40	1.9e-37	9.7e-34	4.8e-33	[-1]	Group09	6.22222	196	[AGL, AGTR1, AKT1, AR, ARAF, BCAR1, BCL2, BCL6, BRAF, BRAP, CAMK4, CASP3, CASP8, CASP9, CAV1, CBL, CBLB, CD19, CD36, CD44, CD55, CD79A, CD79B, CDC25A, CDC25C, CDK1, CENPC, CIITA, CPNE1, CREBBP, CRK, CSF1R, CSF2RB, CSK, CTNNB1, DGKZ, DLG4, DOK1, DOK3, DOK4, EEF2K, EGFR, ELK1, EP300, ETS1, EVL, EZH2, FASLG, FCER2, FCGR2A, FLT1, FYB, FYN, GRAP, GRB10, GRIN1, GRIN2A, GRIN2B, GRIN2D, HDAC1, HDAC2, HDA…
GO:0000742	Signaling by Leptin	REACTOME_Pathways_01.03.2017	4.5e-40	1.9e-37	9.7e-34	4.8e-33	[-1]	Group09	6.22222	196	[AGL, AGTR1, AKT1, AR, ARAF, BCAR1, BCL2, BCL6, BRAF, BRAP, CAMK4, CASP3, CASP8, CASP9, CAV1, CBL, CBLB, CD19, CD36, CD44, CD55, CD79A, CD79B, CDC25A, CDC25C, CDK1, CENPC, CIITA, CPNE1, CREBBP, CRK, CSF1R, CSF2RB, CSK, CTNNB1, DGKZ, DLG4, DOK1, DOK3, DOK4, EEF2K, EGFR, ELK1, EP300, ETS1, EVL, EZH2, FASLG, FCER2, FCGR2A, FLT1, FYB, FYN, GRAP, GRB10, GRIN1, GRIN2A, GRIN2B, GRIN2D, HDAC1, HDAC2, HDA…
GO:0000760	FCERI mediated MAPK activation	REACTOME_Pathways_01.03.2017	4.5e-40	1.9e-37	9.7e-34	4.8e-33	[-1]	Group09	6.22222	196	[AGL, AGTR1, AKT1, AR, ARAF, BCAR1, BCL2, BCL6, BRAF, BRAP, CAMK4, CASP3, CASP8, CASP9, CAV1, CBL, CBLB, CD19, CD36, CD44, CD55, CD79A, CD79B, CDC25A, CDC25C, CDK1, CENPC, CIITA, CPNE1, CREBBP, CRK, CSF1R, CSF2RB, CSK, CTNNB1, DGKZ, DLG4, DOK1, DOK3, DOK4, EEF2K, EGFR, ELK1, EP300, ETS1, EVL, EZH2, FASLG, FCER2, FCGR2A, FLT1, FYB, FYN, GRAP, GRB10, GRIN1, GRIN2A, GRIN2B, GRIN2D, HDAC1, HDAC2, HDA…
GO:0000762	FCERI mediated NF-kB activation	REACTOME_Pathways_01.03.2017	4.5e-40	1.9e-37	9.7e-34	4.8e-33	[-1]	Group09	6.22222	196	[AGL, AGTR1, AKT1, AR, ARAF, BCAR1, BCL2, BCL6, BRAF, BRAP, CAMK4, CASP3, CASP8, CASP9, CAV1, CBL, CBLB, CD19, CD36, CD44, CD55, CD79A, CD79B, CDC25A, CDC25C, CDK1, CENPC, CIITA, CPNE1, CREBBP, CRK, CSF1R, CSF2RB, CSK, CTNNB1, DGKZ, DLG4, DOK1, DOK3, DOK4, EEF2K, EGFR, ELK1, EP300, ETS1, EVL, EZH2, FASLG, FCER2, FCGR2A, FLT1, FYB, FYN, GRAP, GRB10, GRIN1, GRIN2A, GRIN2B, GRIN2D, HDAC1, HDAC2, HDA…
GO:0000837	Autodegradation of the E3 ubiquitin ligase COP1	REACTOME_Pathways_01.03.2017	4.5e-40	1.9e-37	9.7e-34	4.8e-33	[-1]	Group09	6.22222	196	[AGL, AGTR1, AKT1, AR, ARAF, BCAR1, BCL2, BCL6, BRAF, BRAP, CAMK4, CASP3, CASP8, CASP9, CAV1, CBL, CBLB, CD19, CD36, CD44, CD55, CD79A, CD79B, CDC25A, CDC25C, CDK1, CENPC, CIITA, CPNE1, CREBBP, CRK, CSF1R, CSF2RB, CSK, CTNNB1, DGKZ, DLG4, DOK1, DOK3, DOK4, EEF2K, EGFR, ELK1, EP300, ETS1, EVL, EZH2, FASLG, FCER2, FCGR2A, FLT1, FYB, FYN, GRAP, GRB10, GRIN1, GRIN2A, GRIN2B, GRIN2D, HDAC1, HDAC2, HDA…
GO:0000839	Regulation of ornithine decarboxylase (ODC)	REACTOME_Pathways_01.03.2017	4.5e-40	1.9e-37	9.7e-34	4.8e-33	[-1]	Group09	6.22222	196	[AGL, AGTR1, AKT1, AR, ARAF, BCAR1, BCL2, BCL6, BRAF, BRAP, CAMK4, CASP3, CASP8, CASP9, CAV1, CBL, CBLB, CD19, CD36, CD44, CD55, CD79A, CD79B, CDC25A, CDC25C, CDK1, CENPC, CIITA, CPNE1, CREBBP, CRK, CSF1R, CSF2RB, CSK, CTNNB1, DGKZ, DLG4, DOK1, DOK3, DOK4, EEF2K, EGFR, ELK1, EP300, ETS1, EVL, EZH2, FASLG, FCER2, FCGR2A, FLT1, FYB, FYN, GRAP, GRB10, GRIN1, GRIN2A, GRIN2B, GRIN2D, HDAC1, HDAC2, HDA…
GO:0000843	Metabolism of polyamines	REACTOME_Pathways_01.03.2017	4.5e-40	1.9e-37	9.7e-34	4.8e-33	[-1]	Group09	6.22222	196	[AGL, AGTR1, AKT1, AR, ARAF, BCAR1, BCL2, BCL6, BRAF, BRAP, CAMK4, CASP3, CASP8, CASP9, CAV1, CBL, CBLB, CD19, CD36, CD44, CD55, CD79A, CD79B, CDC25A, CDC25C, CDK1, CENPC, CIITA, CPNE1, CREBBP, CRK, CSF1R, CSF2RB, CSK, CTNNB1, DGKZ, DLG4, DOK1, DOK3, DOK4, EEF2K, EGFR, ELK1, EP300, ETS1, EVL, EZH2, FASLG, FCER2, FCGR2A, FLT1, FYB, FYN, GRAP, GRB10, GRIN1, GRIN2A, GRIN2B, GRIN2D, HDAC1, HDAC2, HDA…
GO:0000875	NCAM signaling for neurite out-growth	REACTOME_Pathways_01.03.2017	4.5e-40	1.9e-37	9.7e-34	4.8e-33	[-1]	Group09	6.22222	196	[AGL, AGTR1, AKT1, AR, ARAF, BCAR1, BCL2, BCL6, BRAF, BRAP, CAMK4, CASP3, CASP8, CASP9, CAV1, CBL, CBLB, CD19, CD36, CD44, CD55, CD79A, CD79B, CDC25A, CDC25C, CDK1, CENPC, CIITA, CPNE1, CREBBP, CRK, CSF1R, CSF2RB, CSK, CTNNB1, DGKZ, DLG4, DOK1, DOK3, DOK4, EEF2K, EGFR, ELK1, EP300, ETS1, EVL, EZH2, FASLG, FCER2, FCGR2A, FLT1, FYB, FYN, GRAP, GRB10, GRIN1, GRIN2A, GRIN2B, GRIN2D, HDAC1, HDAC2, HDA…
GO:0000916	ABC-family proteins mediated transport	REACTOME_Pathways_01.03.2017	4.5e-40	1.9e-37	9.7e-34	4.8e-33	[-1]	Group09	6.22222	196	[AGL, AGTR1, AKT1, AR, ARAF, BCAR1, BCL2, BCL6, BRAF, BRAP, CAMK4, CASP3, CASP8, CASP9, CAV1, CBL, CBLB, CD19, CD36, CD44, CD55, CD79A, CD79B, CDC25A, CDC25C, CDK1, CENPC, CIITA, CPNE1, CREBBP, CRK, CSF1R, CSF2RB, CSK, CTNNB1, DGKZ, DLG4, DOK1, DOK3, DOK4, EEF2K, EGFR, ELK1, EP300, ETS1, EVL, EZH2, FASLG, FCER2, FCGR2A, FLT1, FYB, FYN, GRAP, GRB10, GRIN1, GRIN2A, GRIN2B, GRIN2D, HDAC1, HDAC2, HDA…
GO:0000919	Beta-catenin independent WNT signaling	REACTOME_Pathways_01.03.2017	4.5e-40	1.9e-37	9.7e-34	4.8e-33	[-1]	Group09	6.22222	196	[AGL, AGTR1, AKT1, AR, ARAF, BCAR1, BCL2, BCL6, BRAF, BRAP, CAMK4, CASP3, CASP8, CASP9, CAV1, CBL, CBLB, CD19, CD36, CD44, CD55, CD79A, CD79B, CDC25A, CDC25C, CDK1, CENPC, CIITA, CPNE1, CREBBP, CRK, CSF1R, CSF2RB, CSK, CTNNB1, DGKZ, DLG4, DOK1, DOK3, DOK4, EEF2K, EGFR, ELK1, EP300, ETS1, EVL, EZH2, FASLG, FCER2, FCGR2A, FLT1, FYB, FYN, GRAP, GRB10, GRIN1, GRIN2A, GRIN2B, GRIN2D, HDAC1, HDAC2, HDA…
GO:0000986	PCP/CE pathway	REACTOME_Pathways_01.03.2017	4.5e-40	1.9e-37	9.7e-34	4.8e-33	[-1]	Group09	6.22222	196	[AGL, AGTR1, AKT1, AR, ARAF, BCAR1, BCL2, BCL6, BRAF, BRAP, CAMK4, CASP3, CASP8, CASP9, CAV1, CBL, CBLB, CD19, CD36, CD44, CD55, CD79A, CD79B, CDC25A, CDC25C, CDK1, CENPC, CIITA, CPNE1, CREBBP, CRK, CSF1R, CSF2RB, CSK, CTNNB1, DGKZ, DLG4, DOK1, DOK3, DOK4, EEF2K, EGFR, ELK1, EP300, ETS1, EVL, EZH2, FASLG, FCER2, FCGR2A, FLT1, FYB, FYN, GRAP, GRB10, GRIN1, GRIN2A, GRIN2B, GRIN2D, HDAC1, HDAC2, HDA…
GO:0001076	VEGFA-VEGFR2 Pathway	REACTOME_Pathways_01.03.2017	4.5e-40	1.9e-37	9.7e-34	4.8e-33	[-1]	Group09	6.22222	196	[AGL, AGTR1, AKT1, AR, ARAF, BCAR1, BCL2, BCL6, BRAF, BRAP, CAMK4, CASP3, CASP8, CASP9, CAV1, CBL, CBLB, CD19, CD36, CD44, CD55, CD79A, CD79B, CDC25A, CDC25C, CDK1, CENPC, CIITA, CPNE1, CREBBP, CRK, CSF1R, CSF2RB, CSK, CTNNB1, DGKZ, DLG4, DOK1, DOK3, DOK4, EEF2K, EGFR, ELK1, EP300, ETS1, EVL, EZH2, FASLG, FCER2, FCGR2A, FLT1, FYB, FYN, GRAP, GRB10, GRIN1, GRIN2A, GRIN2B, GRIN2D, HDAC1, HDAC2, HDA…
GO:0001115	Signaling by Interleukins	REACTOME_Pathways_01.03.2017	4.5e-40	1.9e-37	9.7e-34	4.8e-33	[-1]	Group09	6.22222	196	[AGL, AGTR1, AKT1, AR, ARAF, BCAR1, BCL2, BCL6, BRAF, BRAP, CAMK4, CASP3, CASP8, CASP9, CAV1, CBL, CBLB, CD19, CD36, CD44, CD55, CD79A, CD79B, CDC25A, CDC25C, CDK1, CENPC, CIITA, CPNE1, CREBBP, CRK, CSF1R, CSF2RB, CSK, CTNNB1, DGKZ, DLG4, DOK1, DOK3, DOK4, EEF2K, EGFR, ELK1, EP300, ETS1, EVL, EZH2, FASLG, FCER2, FCGR2A, FLT1, FYB, FYN, GRAP, GRB10, GRIN1, GRIN2A, GRIN2B, GRIN2D, HDAC1, HDAC2, HDA…
GO:0001122	AUF1 (hnRNP D0) binds and destabilizes mRNA	REACTOME_Pathways_01.03.2017	4.5e-40	1.9e-37	9.7e-34	4.8e-33	[-1]	Group09	6.22222	196	[AGL, AGTR1, AKT1, AR, ARAF, BCAR1, BCL2, BCL6, BRAF, BRAP, CAMK4, CASP3, CASP8, CASP9, CAV1, CBL, CBLB, CD19, CD36, CD44, CD55, CD79A, CD79B, CDC25A, CDC25C, CDK1, CENPC, CIITA, CPNE1, CREBBP, CRK, CSF1R, CSF2RB, CSK, CTNNB1, DGKZ, DLG4, DOK1, DOK3, DOK4, EEF2K, EGFR, ELK1, EP300, ETS1, EVL, EZH2, FASLG, FCER2, FCGR2A, FLT1, FYB, FYN, GRAP, GRB10, GRIN1, GRIN2A, GRIN2B, GRIN2D, HDAC1, HDAC2, HDA…
GO:0001125	Regulation of mRNA stability by proteins that bind AU-rich elements	REACTOME_Pathways_01.03.2017	4.5e-40	1.9e-37	9.7e-34	4.8e-33	[-1]	Group09	6.22222	196	[AGL, AGTR1, AKT1, AR, ARAF, BCAR1, BCL2, BCL6, BRAF, BRAP, CAMK4, CASP3, CASP8, CASP9, CAV1, CBL, CBLB, CD19, CD36, CD44, CD55, CD79A, CD79B, CDC25A, CDC25C, CDK1, CENPC, CIITA, CPNE1, CREBBP, CRK, CSF1R, CSF2RB, CSK, CTNNB1, DGKZ, DLG4, DOK1, DOK3, DOK4, EEF2K, EGFR, ELK1, EP300, ETS1, EVL, EZH2, FASLG, FCER2, FCGR2A, FLT1, FYB, FYN, GRAP, GRB10, GRIN1, GRIN2A, GRIN2B, GRIN2D, HDAC1, HDAC2, HDA…
GO:0001131	Interleukin-2 signaling	REACTOME_Pathways_01.03.2017	4.5e-40	1.9e-37	9.7e-34	4.8e-33	[-1]	Group09	6.22222	196	[AGL, AGTR1, AKT1, AR, ARAF, BCAR1, BCL2, BCL6, BRAF, BRAP, CAMK4, CASP3, CASP8, CASP9, CAV1, CBL, CBLB, CD19, CD36, CD44, CD55, CD79A, CD79B, CDC25A, CDC25C, CDK1, CENPC, CIITA, CPNE1, CREBBP, CRK, CSF1R, CSF2RB, CSK, CTNNB1, DGKZ, DLG4, DOK1, DOK3, DOK4, EEF2K, EGFR, ELK1, EP300, ETS1, EVL, EZH2, FASLG, FCER2, FCGR2A, FLT1, FYB, FYN, GRAP, GRB10, GRIN1, GRIN2A, GRIN2B, GRIN2D, HDAC1, HDAC2, HDA…
GO:0001133	Mitotic G2-G2/M phases	REACTOME_Pathways_01.03.2017	4.5e-40	1.9e-37	9.7e-34	4.8e-33	[-1]	Group09	6.22222	196	[AGL, AGTR1, AKT1, AR, ARAF, BCAR1, BCL2, BCL6, BRAF, BRAP, CAMK4, CASP3, CASP8, CASP9, CAV1, CBL, CBLB, CD19, CD36, CD44, CD55, CD79A, CD79B, CDC25A, CDC25C, CDK1, CENPC, CIITA, CPNE1, CREBBP, CRK, CSF1R, CSF2RB, CSK, CTNNB1, DGKZ, DLG4, DOK1, DOK3, DOK4, EEF2K, EGFR, ELK1, EP300, ETS1, EVL, EZH2, FASLG, FCER2, FCGR2A, FLT1, FYB, FYN, GRAP, GRB10, GRIN1, GRIN2A, GRIN2B, GRIN2D, HDAC1, HDAC2, HDA…
GO:0001134	Regulation of mitotic cell cycle	REACTOME_Pathways_01.03.2017	4.5e-40	1.9e-37	9.7e-34	4.8e-33	[-1]	Group09	6.22222	196	[AGL, AGTR1, AKT1, AR, ARAF, BCAR1, BCL2, BCL6, BRAF, BRAP, CAMK4, CASP3, CASP8, CASP9, CAV1, CBL, CBLB, CD19, CD36, CD44, CD55, CD79A, CD79B, CDC25A, CDC25C, CDK1, CENPC, CIITA, CPNE1, CREBBP, CRK, CSF1R, CSF2RB, CSK, CTNNB1, DGKZ, DLG4, DOK1, DOK3, DOK4, EEF2K, EGFR, ELK1, EP300, ETS1, EVL, EZH2, FASLG, FCER2, FCGR2A, FLT1, FYB, FYN, GRAP, GRB10, GRIN1, GRIN2A, GRIN2B, GRIN2D, HDAC1, HDAC2, HDA…
GO:0001139	Asymmetric localization of PCP proteins	REACTOME_Pathways_01.03.2017	4.5e-40	1.9e-37	9.7e-34	4.8e-33	[-1]	Group09	6.22222	196	[AGL, AGTR1, AKT1, AR, ARAF, BCAR1, BCL2, BCL6, BRAF, BRAP, CAMK4, CASP3, CASP8, CASP9, CAV1, CBL, CBLB, CD19, CD36, CD44, CD55, CD79A, CD79B, CDC25A, CDC25C, CDK1, CENPC, CIITA, CPNE1, CREBBP, CRK, CSF1R, CSF2RB, CSK, CTNNB1, DGKZ, DLG4, DOK1, DOK3, DOK4, EEF2K, EGFR, ELK1, EP300, ETS1, EVL, EZH2, FASLG, FCER2, FCGR2A, FLT1, FYB, FYN, GRAP, GRB10, GRIN1, GRIN2A, GRIN2B, GRIN2D, HDAC1, HDAC2, HDA…
GO:0001141	Degradation of AXIN	REACTOME_Pathways_01.03.2017	4.5e-40	1.9e-37	9.7e-34	4.8e-33	[-1]	Group09	6.22222	196	[AGL, AGTR1, AKT1, AR, ARAF, BCAR1, BCL2, BCL6, BRAF, BRAP, CAMK4, CASP3, CASP8, CASP9, CAV1, CBL, CBLB, CD19, CD36, CD44, CD55, CD79A, CD79B, CDC25A, CDC25C, CDK1, CENPC, CIITA, CPNE1, CREBBP, CRK, CSF1R, CSF2RB, CSK, CTNNB1, DGKZ, DLG4, DOK1, DOK3, DOK4, EEF2K, EGFR, ELK1, EP300, ETS1, EVL, EZH2, FASLG, FCER2, FCGR2A, FLT1, FYB, FYN, GRAP, GRB10, GRIN1, GRIN2A, GRIN2B, GRIN2D, HDAC1, HDAC2, HDA…
GO:0001142	Degradation of DVL	REACTOME_Pathways_01.03.2017	4.5e-40	1.9e-37	9.7e-34	4.8e-33	[-1]	Group09	6.22222	196	[AGL, AGTR1, AKT1, AR, ARAF, BCAR1, BCL2, BCL6, BRAF, BRAP, CAMK4, CASP3, CASP8, CASP9, CAV1, CBL, CBLB, CD19, CD36, CD44, CD55, CD79A, CD79B, CDC25A, CDC25C, CDK1, CENPC, CIITA, CPNE1, CREBBP, CRK, CSF1R, CSF2RB, CSK, CTNNB1, DGKZ, DLG4, DOK1, DOK3, DOK4, EEF2K, EGFR, ELK1, EP300, ETS1, EVL, EZH2, FASLG, FCER2, FCGR2A, FLT1, FYB, FYN, GRAP, GRB10, GRIN1, GRIN2A, GRIN2B, GRIN2D, HDAC1, HDAC2, HDA…
GO:0001167	Interleukin-3, 5 and GM-CSF signaling	REACTOME_Pathways_01.03.2017	4.5e-40	1.9e-37	9.7e-34	4.8e-33	[-1]	Group09	6.22222	196	[AGL, AGTR1, AKT1, AR, ARAF, BCAR1, BCL2, BCL6, BRAF, BRAP, CAMK4, CASP3, CASP8, CASP9, CAV1, CBL, CBLB, CD19, CD36, CD44, CD55, CD79A, CD79B, CDC25A, CDC25C, CDK1, CENPC, CIITA, CPNE1, CREBBP, CRK, CSF1R, CSF2RB, CSK, CTNNB1, DGKZ, DLG4, DOK1, DOK3, DOK4, EEF2K, EGFR, ELK1, EP300, ETS1, EVL, EZH2, FASLG, FCER2, FCGR2A, FLT1, FYB, FYN, GRAP, GRB10, GRIN1, GRIN2A, GRIN2B, GRIN2D, HDAC1, HDAC2, HDA…
GO:0001178	VEGFR2 mediated cell proliferation	REACTOME_Pathways_01.03.2017	4.5e-40	1.9e-37	9.7e-34	4.8e-33	[-1]	Group09	6.22222	196	[AGL, AGTR1, AKT1, AR, ARAF, BCAR1, BCL2, BCL6, BRAF, BRAP, CAMK4, CASP3, CASP8, CASP9, CAV1, CBL, CBLB, CD19, CD36, CD44, CD55, CD79A, CD79B, CDC25A, CDC25C, CDK1, CENPC, CIITA, CPNE1, CREBBP, CRK, CSF1R, CSF2RB, CSK, CTNNB1, DGKZ, DLG4, DOK1, DOK3, DOK4, EEF2K, EGFR, ELK1, EP300, ETS1, EVL, EZH2, FASLG, FCER2, FCGR2A, FLT1, FYB, FYN, GRAP, GRB10, GRIN1, GRIN2A, GRIN2B, GRIN2D, HDAC1, HDAC2, HDA…
GO:0001209	Programmed Cell Death	REACTOME_Pathways_01.03.2017	9.2e-42	4e-39	9.7e-34	4.8e-33	[-1]	Group09	6.93261	179	[AGTR1, AKT1, AR, ARAF, ARHGAP33, BCAR1, BCL2, BRAF, BRAP, CAMK4, CASP3, CASP8, CASP9, CAV1, CBL, CD19, CD55, CDC25C, CDK1, CDK5, CENPC, CFLAR, CNTN1, CREBBP, CRK, CSF2RB, CSK, CTNNB1, DAPK3, DGKZ, DLG4, DOK1, EEF2K, EGFR, ELK1, EP300, EVL, FAS, FASLG, FCER2, FLT1, FNTA, FNTB, FYN, GRAP, GRB10, GRIN1, GRIN2A, GRIN2B, GRIN2D, HDAC1, HDAC2, HDAC3, HDAC4, HDAC5, HDAC6, HDAC9, HRAS, HSP90AA1, HSPB1, …
GO:0001212	Hedgehog ligand biogenesis	REACTOME_Pathways_01.03.2017	4.5e-40	1.9e-37	9.7e-34	4.8e-33	[-1]	Group09	6.22222	196	[AGL, AGTR1, AKT1, AR, ARAF, BCAR1, BCL2, BCL6, BRAF, BRAP, CAMK4, CASP3, CASP8, CASP9, CAV1, CBL, CBLB, CD19, CD36, CD44, CD55, CD79A, CD79B, CDC25A, CDC25C, CDK1, CENPC, CIITA, CPNE1, CREBBP, CRK, CSF1R, CSF2RB, CSK, CTNNB1, DGKZ, DLG4, DOK1, DOK3, DOK4, EEF2K, EGFR, ELK1, EP300, ETS1, EVL, EZH2, FASLG, FCER2, FCGR2A, FLT1, FYB, FYN, GRAP, GRB10, GRIN1, GRIN2A, GRIN2B, GRIN2D, HDAC1, HDAC2, HDA…
GO:0001213	Signaling by Hedgehog	REACTOME_Pathways_01.03.2017	4.5e-40	1.9e-37	9.7e-34	4.8e-33	[-1]	Group09	6.22222	196	[AGL, AGTR1, AKT1, AR, ARAF, BCAR1, BCL2, BCL6, BRAF, BRAP, CAMK4, CASP3, CASP8, CASP9, CAV1, CBL, CBLB, CD19, CD36, CD44, CD55, CD79A, CD79B, CDC25A, CDC25C, CDK1, CENPC, CIITA, CPNE1, CREBBP, CRK, CSF1R, CSF2RB, CSK, CTNNB1, DGKZ, DLG4, DOK1, DOK3, DOK4, EEF2K, EGFR, ELK1, EP300, ETS1, EVL, EZH2, FASLG, FCER2, FCGR2A, FLT1, FYB, FYN, GRAP, GRB10, GRIN1, GRIN2A, GRIN2B, GRIN2D, HDAC1, HDAC2, HDA…
GO:0001223	Hh mutants that don't undergo autocatalytic processing are degraded by ERAD	REACTOME_Pathways_01.03.2017	4.5e-40	1.9e-37	9.7e-34	4.8e-33	[-1]	Group09	6.22222	196	[AGL, AGTR1, AKT1, AR, ARAF, BCAR1, BCL2, BCL6, BRAF, BRAP, CAMK4, CASP3, CASP8, CASP9, CAV1, CBL, CBLB, CD19, CD36, CD44, CD55, CD79A, CD79B, CDC25A, CDC25C, CDK1, CENPC, CIITA, CPNE1, CREBBP, CRK, CSF1R, CSF2RB, CSK, CTNNB1, DGKZ, DLG4, DOK1, DOK3, DOK4, EEF2K, EGFR, ELK1, EP300, ETS1, EVL, EZH2, FASLG, FCER2, FCGR2A, FLT1, FYB, FYN, GRAP, GRB10, GRIN1, GRIN2A, GRIN2B, GRIN2D, HDAC1, HDAC2, HDA…
GO:0001229	Hh mutants abrogate ligand secretion	REACTOME_Pathways_01.03.2017	4.5e-40	1.9e-37	9.7e-34	4.8e-33	[-1]	Group09	6.22222	196	[AGL, AGTR1, AKT1, AR, ARAF, BCAR1, BCL2, BCL6, BRAF, BRAP, CAMK4, CASP3, CASP8, CASP9, CAV1, CBL, CBLB, CD19, CD36, CD44, CD55, CD79A, CD79B, CDC25A, CDC25C, CDK1, CENPC, CIITA, CPNE1, CREBBP, CRK, CSF1R, CSF2RB, CSK, CTNNB1, DGKZ, DLG4, DOK1, DOK3, DOK4, EEF2K, EGFR, ELK1, EP300, ETS1, EVL, EZH2, FASLG, FCER2, FCGR2A, FLT1, FYB, FYN, GRAP, GRB10, GRIN1, GRIN2A, GRIN2B, GRIN2D, HDAC1, HDAC2, HDA…
GO:0001266	Dectin-1 mediated noncanonical NF-kB signaling	REACTOME_Pathways_01.03.2017	4.5e-40	1.9e-37	9.7e-34	4.8e-33	[-1]	Group09	6.22222	196	[AGL, AGTR1, AKT1, AR, ARAF, BCAR1, BCL2, BCL6, BRAF, BRAP, CAMK4, CASP3, CASP8, CASP9, CAV1, CBL, CBLB, CD19, CD36, CD44, CD55, CD79A, CD79B, CDC25A, CDC25C, CDK1, CENPC, CIITA, CPNE1, CREBBP, CRK, CSF1R, CSF2RB, CSK, CTNNB1, DGKZ, DLG4, DOK1, DOK3, DOK4, EEF2K, EGFR, ELK1, EP300, ETS1, EVL, EZH2, FASLG, FCER2, FCGR2A, FLT1, FYB, FYN, GRAP, GRB10, GRIN1, GRIN2A, GRIN2B, GRIN2D, HDAC1, HDAC2, HDA…
GO:0001268	CLEC7A (Dectin-1) signaling	REACTOME_Pathways_01.03.2017	4.5e-40	1.9e-37	9.7e-34	4.8e-33	[-1]	Group09	6.22222	196	[AGL, AGTR1, AKT1, AR, ARAF, BCAR1, BCL2, BCL6, BRAF, BRAP, CAMK4, CASP3, CASP8, CASP9, CAV1, CBL, CBLB, CD19, CD36, CD44, CD55, CD79A, CD79B, CDC25A, CDC25C, CDK1, CENPC, CIITA, CPNE1, CREBBP, CRK, CSF1R, CSF2RB, CSK, CTNNB1, DGKZ, DLG4, DOK1, DOK3, DOK4, EEF2K, EGFR, ELK1, EP300, ETS1, EVL, EZH2, FASLG, FCER2, FCGR2A, FLT1, FYB, FYN, GRAP, GRB10, GRIN1, GRIN2A, GRIN2B, GRIN2D, HDAC1, HDAC2, HDA…
GO:0001270	Degradation of GLI1 by the proteasome	REACTOME_Pathways_01.03.2017	4.5e-40	1.9e-37	9.7e-34	4.8e-33	[-1]	Group09	6.22222	196	[AGL, AGTR1, AKT1, AR, ARAF, BCAR1, BCL2, BCL6, BRAF, BRAP, CAMK4, CASP3, CASP8, CASP9, CAV1, CBL, CBLB, CD19, CD36, CD44, CD55, CD79A, CD79B, CDC25A, CDC25C, CDK1, CENPC, CIITA, CPNE1, CREBBP, CRK, CSF1R, CSF2RB, CSK, CTNNB1, DGKZ, DLG4, DOK1, DOK3, DOK4, EEF2K, EGFR, ELK1, EP300, ETS1, EVL, EZH2, FASLG, FCER2, FCGR2A, FLT1, FYB, FYN, GRAP, GRB10, GRIN1, GRIN2A, GRIN2B, GRIN2D, HDAC1, HDAC2, HDA…
GO:0001271	Degradation of GLI2 by the proteasome	REACTOME_Pathways_01.03.2017	4.5e-40	1.9e-37	9.7e-34	4.8e-33	[-1]	Group09	6.22222	196	[AGL, AGTR1, AKT1, AR, ARAF, BCAR1, BCL2, BCL6, BRAF, BRAP, CAMK4, CASP3, CASP8, CASP9, CAV1, CBL, CBLB, CD19, CD36, CD44, CD55, CD79A, CD79B, CDC25A, CDC25C, CDK1, CENPC, CIITA, CPNE1, CREBBP, CRK, CSF1R, CSF2RB, CSK, CTNNB1, DGKZ, DLG4, DOK1, DOK3, DOK4, EEF2K, EGFR, ELK1, EP300, ETS1, EVL, EZH2, FASLG, FCER2, FCGR2A, FLT1, FYB, FYN, GRAP, GRB10, GRIN1, GRIN2A, GRIN2B, GRIN2D, HDAC1, HDAC2, HDA…
GO:0001272	GLI3 is processed to GLI3R by the proteasome	REACTOME_Pathways_01.03.2017	4.5e-40	1.9e-37	9.7e-34	4.8e-33	[-1]	Group09	6.22222	196	[AGL, AGTR1, AKT1, AR, ARAF, BCAR1, BCL2, BCL6, BRAF, BRAP, CAMK4, CASP3, CASP8, CASP9, CAV1, CBL, CBLB, CD19, CD36, CD44, CD55, CD79A, CD79B, CDC25A, CDC25C, CDK1, CENPC, CIITA, CPNE1, CREBBP, CRK, CSF1R, CSF2RB, CSK, CTNNB1, DGKZ, DLG4, DOK1, DOK3, DOK4, EEF2K, EGFR, ELK1, EP300, ETS1, EVL, EZH2, FASLG, FCER2, FCGR2A, FLT1, FYB, FYN, GRAP, GRB10, GRIN1, GRIN2A, GRIN2B, GRIN2D, HDAC1, HDAC2, HDA…
GO:0001273	Hedgehog 'off' state	REACTOME_Pathways_01.03.2017	4.5e-40	1.9e-37	9.7e-34	4.8e-33	[-1]	Group09	6.22222	196	[AGL, AGTR1, AKT1, AR, ARAF, BCAR1, BCL2, BCL6, BRAF, BRAP, CAMK4, CASP3, CASP8, CASP9, CAV1, CBL, CBLB, CD19, CD36, CD44, CD55, CD79A, CD79B, CDC25A, CDC25C, CDK1, CENPC, CIITA, CPNE1, CREBBP, CRK, CSF1R, CSF2RB, CSK, CTNNB1, DGKZ, DLG4, DOK1, DOK3, DOK4, EEF2K, EGFR, ELK1, EP300, ETS1, EVL, EZH2, FASLG, FCER2, FCGR2A, FLT1, FYB, FYN, GRAP, GRB10, GRIN1, GRIN2A, GRIN2B, GRIN2D, HDAC1, HDAC2, HDA…
GO:0001277	ABC transporter disorders	REACTOME_Pathways_01.03.2017	4.5e-40	1.9e-37	9.7e-34	4.8e-33	[-1]	Group09	6.22222	196	[AGL, AGTR1, AKT1, AR, ARAF, BCAR1, BCL2, BCL6, BRAF, BRAP, CAMK4, CASP3, CASP8, CASP9, CAV1, CBL, CBLB, CD19, CD36, CD44, CD55, CD79A, CD79B, CDC25A, CDC25C, CDK1, CENPC, CIITA, CPNE1, CREBBP, CRK, CSF1R, CSF2RB, CSK, CTNNB1, DGKZ, DLG4, DOK1, DOK3, DOK4, EEF2K, EGFR, ELK1, EP300, ETS1, EVL, EZH2, FASLG, FCER2, FCGR2A, FLT1, FYB, FYN, GRAP, GRB10, GRIN1, GRIN2A, GRIN2B, GRIN2D, HDAC1, HDAC2, HDA…
GO:0001282	Disorders of transmembrane transporters	REACTOME_Pathways_01.03.2017	4.5e-40	1.9e-37	9.7e-34	4.8e-33	[-1]	Group09	6.22222	196	[AGL, AGTR1, AKT1, AR, ARAF, BCAR1, BCL2, BCL6, BRAF, BRAP, CAMK4, CASP3, CASP8, CASP9, CAV1, CBL, CBLB, CD19, CD36, CD44, CD55, CD79A, CD79B, CDC25A, CDC25C, CDK1, CENPC, CIITA, CPNE1, CREBBP, CRK, CSF1R, CSF2RB, CSK, CTNNB1, DGKZ, DLG4, DOK1, DOK3, DOK4, EEF2K, EGFR, ELK1, EP300, ETS1, EVL, EZH2, FASLG, FCER2, FCGR2A, FLT1, FYB, FYN, GRAP, GRB10, GRIN1, GRIN2A, GRIN2B, GRIN2D, HDAC1, HDAC2, HDA…
GO:0001290	C-type lectin receptors (CLRs)	REACTOME_Pathways_01.03.2017	4.5e-40	1.9e-37	9.7e-34	4.8e-33	[-1]	Group09	6.22222	196	[AGL, AGTR1, AKT1, AR, ARAF, BCAR1, BCL2, BCL6, BRAF, BRAP, CAMK4, CASP3, CASP8, CASP9, CAV1, CBL, CBLB, CD19, CD36, CD44, CD55, CD79A, CD79B, CDC25A, CDC25C, CDK1, CENPC, CIITA, CPNE1, CREBBP, CRK, CSF1R, CSF2RB, CSK, CTNNB1, DGKZ, DLG4, DOK1, DOK3, DOK4, EEF2K, EGFR, ELK1, EP300, ETS1, EVL, EZH2, FASLG, FCER2, FCGR2A, FLT1, FYB, FYN, GRAP, GRB10, GRIN1, GRIN2A, GRIN2B, GRIN2D, HDAC1, HDAC2, HDA…
GO:0001305	Hedgehog 'on' state	REACTOME_Pathways_01.03.2017	4.5e-40	1.9e-37	9.7e-34	4.8e-33	[-1]	Group09	6.22222	196	[AGL, AGTR1, AKT1, AR, ARAF, BCAR1, BCL2, BCL6, BRAF, BRAP, CAMK4, CASP3, CASP8, CASP9, CAV1, CBL, CBLB, CD19, CD36, CD44, CD55, CD79A, CD79B, CDC25A, CDC25C, CDK1, CENPC, CIITA, CPNE1, CREBBP, CRK, CSF1R, CSF2RB, CSK, CTNNB1, DGKZ, DLG4, DOK1, DOK3, DOK4, EEF2K, EGFR, ELK1, EP300, ETS1, EVL, EZH2, FASLG, FCER2, FCGR2A, FLT1, FYB, FYN, GRAP, GRB10, GRIN1, GRIN2A, GRIN2B, GRIN2D, HDAC1, HDAC2, HDA…
GO:0001358	Regulation of RAS by GAPs	REACTOME_Pathways_01.03.2017	4.5e-40	1.9e-37	9.7e-34	4.8e-33	[-1]	Group09	6.22222	196	[AGL, AGTR1, AKT1, AR, ARAF, BCAR1, BCL2, BCL6, BRAF, BRAP, CAMK4, CASP3, CASP8, CASP9, CAV1, CBL, CBLB, CD19, CD36, CD44, CD55, CD79A, CD79B, CDC25A, CDC25C, CDK1, CENPC, CIITA, CPNE1, CREBBP, CRK, CSF1R, CSF2RB, CSK, CTNNB1, DGKZ, DLG4, DOK1, DOK3, DOK4, EEF2K, EGFR, ELK1, EP300, ETS1, EVL, EZH2, FASLG, FCER2, FCGR2A, FLT1, FYB, FYN, GRAP, GRB10, GRIN1, GRIN2A, GRIN2B, GRIN2D, HDAC1, HDAC2, HDA…
GO:0001366	Diseases of signal transduction	REACTOME_Pathways_01.03.2017	4.5e-40	1.9e-37	9.7e-34	4.8e-33	[-1]	Group09	6.22222	196	[AGL, AGTR1, AKT1, AR, ARAF, BCAR1, BCL2, BCL6, BRAF, BRAP, CAMK4, CASP3, CASP8, CASP9, CAV1, CBL, CBLB, CD19, CD36, CD44, CD55, CD79A, CD79B, CDC25A, CDC25C, CDK1, CENPC, CIITA, CPNE1, CREBBP, CRK, CSF1R, CSF2RB, CSK, CTNNB1, DGKZ, DLG4, DOK1, DOK3, DOK4, EEF2K, EGFR, ELK1, EP300, ETS1, EVL, EZH2, FASLG, FCER2, FCGR2A, FLT1, FYB, FYN, GRAP, GRB10, GRIN1, GRIN2A, GRIN2B, GRIN2D, HDAC1, HDAC2, HDA…
GO:0001371	TNFR2 non-canonical NF-kB pathway	REACTOME_Pathways_01.03.2017	4.5e-40	1.9e-37	9.7e-34	4.8e-33	[-1]	Group09	6.22222	196	[AGL, AGTR1, AKT1, AR, ARAF, BCAR1, BCL2, BCL6, BRAF, BRAP, CAMK4, CASP3, CASP8, CASP9, CAV1, CBL, CBLB, CD19, CD36, CD44, CD55, CD79A, CD79B, CDC25A, CDC25C, CDK1, CENPC, CIITA, CPNE1, CREBBP, CRK, CSF1R, CSF2RB, CSK, CTNNB1, DGKZ, DLG4, DOK1, DOK3, DOK4, EEF2K, EGFR, ELK1, EP300, ETS1, EVL, EZH2, FASLG, FCER2, FCGR2A, FLT1, FYB, FYN, GRAP, GRB10, GRIN1, GRIN2A, GRIN2B, GRIN2D, HDAC1, HDAC2, HDA…
GO:0001376	RAF/MAP kinase cascade	REACTOME_Pathways_01.03.2017	4.5e-40	1.9e-37	9.7e-34	4.8e-33	[-1]	Group09	6.22222	196	[AGL, AGTR1, AKT1, AR, ARAF, BCAR1, BCL2, BCL6, BRAF, BRAP, CAMK4, CASP3, CASP8, CASP9, CAV1, CBL, CBLB, CD19, CD36, CD44, CD55, CD79A, CD79B, CDC25A, CDC25C, CDK1, CENPC, CIITA, CPNE1, CREBBP, CRK, CSF1R, CSF2RB, CSK, CTNNB1, DGKZ, DLG4, DOK1, DOK3, DOK4, EEF2K, EGFR, ELK1, EP300, ETS1, EVL, EZH2, FASLG, FCER2, FCGR2A, FLT1, FYB, FYN, GRAP, GRB10, GRIN1, GRIN2A, GRIN2B, GRIN2D, HDAC1, HDAC2, HDA…
GO:0001382	NIK-->noncanonical NF-kB signaling	REACTOME_Pathways_01.03.2017	4.5e-40	1.9e-37	9.7e-34	4.8e-33	[-1]	Group09	6.22222	196	[AGL, AGTR1, AKT1, AR, ARAF, BCAR1, BCL2, BCL6, BRAF, BRAP, CAMK4, CASP3, CASP8, CASP9, CAV1, CBL, CBLB, CD19, CD36, CD44, CD55, CD79A, CD79B, CDC25A, CDC25C, CDK1, CENPC, CIITA, CPNE1, CREBBP, CRK, CSF1R, CSF2RB, CSK, CTNNB1, DGKZ, DLG4, DOK1, DOK3, DOK4, EEF2K, EGFR, ELK1, EP300, ETS1, EVL, EZH2, FASLG, FCER2, FCGR2A, FLT1, FYB, FYN, GRAP, GRB10, GRIN1, GRIN2A, GRIN2B, GRIN2D, HDAC1, HDAC2, HDA…
GO:0001385	Defective CFTR causes cystic fibrosis	REACTOME_Pathways_01.03.2017	4.5e-40	1.9e-37	9.7e-34	4.8e-33	[-1]	Group09	6.22222	196	[AGL, AGTR1, AKT1, AR, ARAF, BCAR1, BCL2, BCL6, BRAF, BRAP, CAMK4, CASP3, CASP8, CASP9, CAV1, CBL, CBLB, CD19, CD36, CD44, CD55, CD79A, CD79B, CDC25A, CDC25C, CDK1, CENPC, CIITA, CPNE1, CREBBP, CRK, CSF1R, CSF2RB, CSK, CTNNB1, DGKZ, DLG4, DOK1, DOK3, DOK4, EEF2K, EGFR, ELK1, EP300, ETS1, EVL, EZH2, FASLG, FCER2, FCGR2A, FLT1, FYB, FYN, GRAP, GRB10, GRIN1, GRIN2A, GRIN2B, GRIN2D, HDAC1, HDAC2, HDA…
GO:0001387	MAPK family signaling cascades	REACTOME_Pathways_01.03.2017	4.5e-40	1.9e-37	9.7e-34	4.8e-33	[-1]	Group09	6.22222	196	[AGL, AGTR1, AKT1, AR, ARAF, BCAR1, BCL2, BCL6, BRAF, BRAP, CAMK4, CASP3, CASP8, CASP9, CAV1, CBL, CBLB, CD19, CD36, CD44, CD55, CD79A, CD79B, CDC25A, CDC25C, CDK1, CENPC, CIITA, CPNE1, CREBBP, CRK, CSF1R, CSF2RB, CSK, CTNNB1, DGKZ, DLG4, DOK1, DOK3, DOK4, EEF2K, EGFR, ELK1, EP300, ETS1, EVL, EZH2, FASLG, FCER2, FCGR2A, FLT1, FYB, FYN, GRAP, GRB10, GRIN1, GRIN2A, GRIN2B, GRIN2D, HDAC1, HDAC2, HDA…
GO:0001392	MAPK1/MAPK3 signaling	REACTOME_Pathways_01.03.2017	4.5e-40	1.9e-37	9.7e-34	4.8e-33	[-1]	Group09	6.22222	196	[AGL, AGTR1, AKT1, AR, ARAF, BCAR1, BCL2, BCL6, BRAF, BRAP, CAMK4, CASP3, CASP8, CASP9, CAV1, CBL, CBLB, CD19, CD36, CD44, CD55, CD79A, CD79B, CDC25A, CDC25C, CDK1, CENPC, CIITA, CPNE1, CREBBP, CRK, CSF1R, CSF2RB, CSK, CTNNB1, DGKZ, DLG4, DOK1, DOK3, DOK4, EEF2K, EGFR, ELK1, EP300, ETS1, EVL, EZH2, FASLG, FCER2, FCGR2A, FLT1, FYB, FYN, GRAP, GRB10, GRIN1, GRIN2A, GRIN2B, GRIN2D, HDAC1, HDAC2, HDA…
GO:0001397	MAPK6/MAPK4 signaling	REACTOME_Pathways_01.03.2017	4.5e-40	1.9e-37	9.7e-34	4.8e-33	[-1]	Group09	6.22222	196	[AGL, AGTR1, AKT1, AR, ARAF, BCAR1, BCL2, BCL6, BRAF, BRAP, CAMK4, CASP3, CASP8, CASP9, CAV1, CBL, CBLB, CD19, CD36, CD44, CD55, CD79A, CD79B, CDC25A, CDC25C, CDK1, CENPC, CIITA, CPNE1, CREBBP, CRK, CSF1R, CSF2RB, CSK, CTNNB1, DGKZ, DLG4, DOK1, DOK3, DOK4, EEF2K, EGFR, ELK1, EP300, ETS1, EVL, EZH2, FASLG, FCER2, FCGR2A, FLT1, FYB, FYN, GRAP, GRB10, GRIN1, GRIN2A, GRIN2B, GRIN2D, HDAC1, HDAC2, HDA…
GO:0001402	Deubiquitination	REACTOME_Pathways_01.03.2017	4.5e-40	1.9e-37	9.7e-34	4.8e-33	[-1]	Group09	6.22222	196	[AGL, AGTR1, AKT1, AR, ARAF, BCAR1, BCL2, BCL6, BRAF, BRAP, CAMK4, CASP3, CASP8, CASP9, CAV1, CBL, CBLB, CD19, CD36, CD44, CD55, CD79A, CD79B, CDC25A, CDC25C, CDK1, CENPC, CIITA, CPNE1, CREBBP, CRK, CSF1R, CSF2RB, CSK, CTNNB1, DGKZ, DLG4, DOK1, DOK3, DOK4, EEF2K, EGFR, ELK1, EP300, ETS1, EVL, EZH2, FASLG, FCER2, FCGR2A, FLT1, FYB, FYN, GRAP, GRB10, GRIN1, GRIN2A, GRIN2B, GRIN2D, HDAC1, HDAC2, HDA…
GO:0001405	UCH proteinases	REACTOME_Pathways_01.03.2017	4.5e-40	1.9e-37	9.7e-34	4.8e-33	[-1]	Group09	6.22222	196	[AGL, AGTR1, AKT1, AR, ARAF, BCAR1, BCL2, BCL6, BRAF, BRAP, CAMK4, CASP3, CASP8, CASP9, CAV1, CBL, CBLB, CD19, CD36, CD44, CD55, CD79A, CD79B, CDC25A, CDC25C, CDK1, CENPC, CIITA, CPNE1, CREBBP, CRK, CSF1R, CSF2RB, CSK, CTNNB1, DGKZ, DLG4, DOK1, DOK3, DOK4, EEF2K, EGFR, ELK1, EP300, ETS1, EVL, EZH2, FASLG, FCER2, FCGR2A, FLT1, FYB, FYN, GRAP, GRB10, GRIN1, GRIN2A, GRIN2B, GRIN2D, HDAC1, HDAC2, HDA…
GO:0001407	Ub-specific processing proteases	REACTOME_Pathways_01.03.2017	4.5e-40	1.9e-37	9.7e-34	4.8e-33	[-1]	Group09	6.22222	196	[AGL, AGTR1, AKT1, AR, ARAF, BCAR1, BCL2, BCL6, BRAF, BRAP, CAMK4, CASP3, CASP8, CASP9, CAV1, CBL, CBLB, CD19, CD36, CD44, CD55, CD79A, CD79B, CDC25A, CDC25C, CDK1, CENPC, CIITA, CPNE1, CREBBP, CRK, CSF1R, CSF2RB, CSK, CTNNB1, DGKZ, DLG4, DOK1, DOK3, DOK4, EEF2K, EGFR, ELK1, EP300, ETS1, EVL, EZH2, FASLG, FCER2, FCGR2A, FLT1, FYB, FYN, GRAP, GRB10, GRIN1, GRIN2A, GRIN2B, GRIN2D, HDAC1, HDAC2, HDA…
GO:0001518	CDT1 association with the CDC6:ORC:origin complex	REACTOME_Pathways_01.03.2017	4.5e-40	1.9e-37	9.7e-34	4.8e-33	[-1]	Group09	6.22222	196	[AGL, AGTR1, AKT1, AR, ARAF, BCAR1, BCL2, BCL6, BRAF, BRAP, CAMK4, CASP3, CASP8, CASP9, CAV1, CBL, CBLB, CD19, CD36, CD44, CD55, CD79A, CD79B, CDC25A, CDC25C, CDK1, CENPC, CIITA, CPNE1, CREBBP, CRK, CSF1R, CSF2RB, CSK, CTNNB1, DGKZ, DLG4, DOK1, DOK3, DOK4, EEF2K, EGFR, ELK1, EP300, ETS1, EVL, EZH2, FASLG, FCER2, FCGR2A, FLT1, FYB, FYN, GRAP, GRB10, GRIN1, GRIN2A, GRIN2B, GRIN2D, HDAC1, HDAC2, HDA…
GO:0001519	Assembly of the pre-replicative complex	REACTOME_Pathways_01.03.2017	4.5e-40	1.9e-37	9.7e-34	4.8e-33	[-1]	Group09	6.22222	196	[AGL, AGTR1, AKT1, AR, ARAF, BCAR1, BCL2, BCL6, BRAF, BRAP, CAMK4, CASP3, CASP8, CASP9, CAV1, CBL, CBLB, CD19, CD36, CD44, CD55, CD79A, CD79B, CDC25A, CDC25C, CDK1, CENPC, CIITA, CPNE1, CREBBP, CRK, CSF1R, CSF2RB, CSK, CTNNB1, DGKZ, DLG4, DOK1, DOK3, DOK4, EEF2K, EGFR, ELK1, EP300, ETS1, EVL, EZH2, FASLG, FCER2, FCGR2A, FLT1, FYB, FYN, GRAP, GRB10, GRIN1, GRIN2A, GRIN2B, GRIN2D, HDAC1, HDAC2, HDA…
GO:0001520	M/G1 Transition	REACTOME_Pathways_01.03.2017	4.5e-40	1.9e-37	9.7e-34	4.8e-33	[-1]	Group09	6.22222	196	[AGL, AGTR1, AKT1, AR, ARAF, BCAR1, BCL2, BCL6, BRAF, BRAP, CAMK4, CASP3, CASP8, CASP9, CAV1, CBL, CBLB, CD19, CD36, CD44, CD55, CD79A, CD79B, CDC25A, CDC25C, CDK1, CENPC, CIITA, CPNE1, CREBBP, CRK, CSF1R, CSF2RB, CSK, CTNNB1, DGKZ, DLG4, DOK1, DOK3, DOK4, EEF2K, EGFR, ELK1, EP300, ETS1, EVL, EZH2, FASLG, FCER2, FCGR2A, FLT1, FYB, FYN, GRAP, GRB10, GRIN1, GRIN2A, GRIN2B, GRIN2D, HDAC1, HDAC2, HDA…
GO:0001524	Mitotic Anaphase	REACTOME_Pathways_01.03.2017	4.5e-40	1.9e-37	9.7e-34	4.8e-33	[-1]	Group09	6.22222	196	[AGL, AGTR1, AKT1, AR, ARAF, BCAR1, BCL2, BCL6, BRAF, BRAP, CAMK4, CASP3, CASP8, CASP9, CAV1, CBL, CBLB, CD19, CD36, CD44, CD55, CD79A, CD79B, CDC25A, CDC25C, CDK1, CENPC, CIITA, CPNE1, CREBBP, CRK, CSF1R, CSF2RB, CSK, CTNNB1, DGKZ, DLG4, DOK1, DOK3, DOK4, EEF2K, EGFR, ELK1, EP300, ETS1, EVL, EZH2, FASLG, FCER2, FCGR2A, FLT1, FYB, FYN, GRAP, GRB10, GRIN1, GRIN2A, GRIN2B, GRIN2D, HDAC1, HDAC2, HDA…
GO:0001526	M Phase	REACTOME_Pathways_01.03.2017	4.5e-40	1.9e-37	9.7e-34	4.8e-33	[-1]	Group09	6.22222	196	[AGL, AGTR1, AKT1, AR, ARAF, BCAR1, BCL2, BCL6, BRAF, BRAP, CAMK4, CASP3, CASP8, CASP9, CAV1, CBL, CBLB, CD19, CD36, CD44, CD55, CD79A, CD79B, CDC25A, CDC25C, CDK1, CENPC, CIITA, CPNE1, CREBBP, CRK, CSF1R, CSF2RB, CSK, CTNNB1, DGKZ, DLG4, DOK1, DOK3, DOK4, EEF2K, EGFR, ELK1, EP300, ETS1, EVL, EZH2, FASLG, FCER2, FCGR2A, FLT1, FYB, FYN, GRAP, GRB10, GRIN1, GRIN2A, GRIN2B, GRIN2D, HDAC1, HDAC2, HDA…
GO:0001528	Orc1 removal from chromatin	REACTOME_Pathways_01.03.2017	4.5e-40	1.9e-37	9.7e-34	4.8e-33	[-1]	Group09	6.22222	196	[AGL, AGTR1, AKT1, AR, ARAF, BCAR1, BCL2, BCL6, BRAF, BRAP, CAMK4, CASP3, CASP8, CASP9, CAV1, CBL, CBLB, CD19, CD36, CD44, CD55, CD79A, CD79B, CDC25A, CDC25C, CDK1, CENPC, CIITA, CPNE1, CREBBP, CRK, CSF1R, CSF2RB, CSK, CTNNB1, DGKZ, DLG4, DOK1, DOK3, DOK4, EEF2K, EGFR, ELK1, EP300, ETS1, EVL, EZH2, FASLG, FCER2, FCGR2A, FLT1, FYB, FYN, GRAP, GRB10, GRIN1, GRIN2A, GRIN2B, GRIN2D, HDAC1, HDAC2, HDA…
GO:0001531	DNA Replication Pre-Initiation	REACTOME_Pathways_01.03.2017	4.5e-40	1.9e-37	9.7e-34	4.8e-33	[-1]	Group09	6.22222	196	[AGL, AGTR1, AKT1, AR, ARAF, BCAR1, BCL2, BCL6, BRAF, BRAP, CAMK4, CASP3, CASP8, CASP9, CAV1, CBL, CBLB, CD19, CD36, CD44, CD55, CD79A, CD79B, CDC25A, CDC25C, CDK1, CENPC, CIITA, CPNE1, CREBBP, CRK, CSF1R, CSF2RB, CSK, CTNNB1, DGKZ, DLG4, DOK1, DOK3, DOK4, EEF2K, EGFR, ELK1, EP300, ETS1, EVL, EZH2, FASLG, FCER2, FCGR2A, FLT1, FYB, FYN, GRAP, GRB10, GRIN1, GRIN2A, GRIN2B, GRIN2D, HDAC1, HDAC2, HDA…
GO:0001532	CDK-mediated phosphorylation and removal of Cdc6	REACTOME_Pathways_01.03.2017	4.5e-40	1.9e-37	9.7e-34	4.8e-33	[-1]	Group09	6.22222	196	[AGL, AGTR1, AKT1, AR, ARAF, BCAR1, BCL2, BCL6, BRAF, BRAP, CAMK4, CASP3, CASP8, CASP9, CAV1, CBL, CBLB, CD19, CD36, CD44, CD55, CD79A, CD79B, CDC25A, CDC25C, CDK1, CENPC, CIITA, CPNE1, CREBBP, CRK, CSF1R, CSF2RB, CSK, CTNNB1, DGKZ, DLG4, DOK1, DOK3, DOK4, EEF2K, EGFR, ELK1, EP300, ETS1, EVL, EZH2, FASLG, FCER2, FCGR2A, FLT1, FYB, FYN, GRAP, GRB10, GRIN1, GRIN2A, GRIN2B, GRIN2D, HDAC1, HDAC2, HDA…
GO:0001533	Switching of origins to a post-replicative state	REACTOME_Pathways_01.03.2017	4.5e-40	1.9e-37	9.7e-34	4.8e-33	[-1]	Group09	6.22222	196	[AGL, AGTR1, AKT1, AR, ARAF, BCAR1, BCL2, BCL6, BRAF, BRAP, CAMK4, CASP3, CASP8, CASP9, CAV1, CBL, CBLB, CD19, CD36, CD44, CD55, CD79A, CD79B, CDC25A, CDC25C, CDK1, CENPC, CIITA, CPNE1, CREBBP, CRK, CSF1R, CSF2RB, CSK, CTNNB1, DGKZ, DLG4, DOK1, DOK3, DOK4, EEF2K, EGFR, ELK1, EP300, ETS1, EVL, EZH2, FASLG, FCER2, FCGR2A, FLT1, FYB, FYN, GRAP, GRB10, GRIN1, GRIN2A, GRIN2B, GRIN2D, HDAC1, HDAC2, HDA…
GO:0001544	Ubiquitin-dependent degradation of Cyclin D1	REACTOME_Pathways_01.03.2017	4.5e-40	1.9e-37	9.7e-34	4.8e-33	[-1]	Group09	6.22222	196	[AGL, AGTR1, AKT1, AR, ARAF, BCAR1, BCL2, BCL6, BRAF, BRAP, CAMK4, CASP3, CASP8, CASP9, CAV1, CBL, CBLB, CD19, CD36, CD44, CD55, CD79A, CD79B, CDC25A, CDC25C, CDK1, CENPC, CIITA, CPNE1, CREBBP, CRK, CSF1R, CSF2RB, CSK, CTNNB1, DGKZ, DLG4, DOK1, DOK3, DOK4, EEF2K, EGFR, ELK1, EP300, ETS1, EVL, EZH2, FASLG, FCER2, FCGR2A, FLT1, FYB, FYN, GRAP, GRB10, GRIN1, GRIN2A, GRIN2B, GRIN2D, HDAC1, HDAC2, HDA…
GO:0001547	Synthesis of DNA	REACTOME_Pathways_01.03.2017	4.5e-40	1.9e-37	9.7e-34	4.8e-33	[-1]	Group09	6.22222	196	[AGL, AGTR1, AKT1, AR, ARAF, BCAR1, BCL2, BCL6, BRAF, BRAP, CAMK4, CASP3, CASP8, CASP9, CAV1, CBL, CBLB, CD19, CD36, CD44, CD55, CD79A, CD79B, CDC25A, CDC25C, CDK1, CENPC, CIITA, CPNE1, CREBBP, CRK, CSF1R, CSF2RB, CSK, CTNNB1, DGKZ, DLG4, DOK1, DOK3, DOK4, EEF2K, EGFR, ELK1, EP300, ETS1, EVL, EZH2, FASLG, FCER2, FCGR2A, FLT1, FYB, FYN, GRAP, GRB10, GRIN1, GRIN2A, GRIN2B, GRIN2D, HDAC1, HDAC2, HDA…
GO:0001548	S Phase	REACTOME_Pathways_01.03.2017	4.5e-40	1.9e-37	9.7e-34	4.8e-33	[-1]	Group09	6.22222	196	[AGL, AGTR1, AKT1, AR, ARAF, BCAR1, BCL2, BCL6, BRAF, BRAP, CAMK4, CASP3, CASP8, CASP9, CAV1, CBL, CBLB, CD19, CD36, CD44, CD55, CD79A, CD79B, CDC25A, CDC25C, CDK1, CENPC, CIITA, CPNE1, CREBBP, CRK, CSF1R, CSF2RB, CSK, CTNNB1, DGKZ, DLG4, DOK1, DOK3, DOK4, EEF2K, EGFR, ELK1, EP300, ETS1, EVL, EZH2, FASLG, FCER2, FCGR2A, FLT1, FYB, FYN, GRAP, GRB10, GRIN1, GRIN2A, GRIN2B, GRIN2D, HDAC1, HDAC2, HDA…
GO:0001550	G2/M Transition	REACTOME_Pathways_01.03.2017	4.5e-40	1.9e-37	9.7e-34	4.8e-33	[-1]	Group09	6.22222	196	[AGL, AGTR1, AKT1, AR, ARAF, BCAR1, BCL2, BCL6, BRAF, BRAP, CAMK4, CASP3, CASP8, CASP9, CAV1, CBL, CBLB, CD19, CD36, CD44, CD55, CD79A, CD79B, CDC25A, CDC25C, CDK1, CENPC, CIITA, CPNE1, CREBBP, CRK, CSF1R, CSF2RB, CSK, CTNNB1, DGKZ, DLG4, DOK1, DOK3, DOK4, EEF2K, EGFR, ELK1, EP300, ETS1, EVL, EZH2, FASLG, FCER2, FCGR2A, FLT1, FYB, FYN, GRAP, GRB10, GRIN1, GRIN2A, GRIN2B, GRIN2D, HDAC1, HDAC2, HDA…
GO:0001551	Cell Cycle, Mitotic	REACTOME_Pathways_01.03.2017	4.5e-40	1.9e-37	9.7e-34	4.8e-33	[-1]	Group09	6.22222	196	[AGL, AGTR1, AKT1, AR, ARAF, BCAR1, BCL2, BCL6, BRAF, BRAP, CAMK4, CASP3, CASP8, CASP9, CAV1, CBL, CBLB, CD19, CD36, CD44, CD55, CD79A, CD79B, CDC25A, CDC25C, CDK1, CENPC, CIITA, CPNE1, CREBBP, CRK, CSF1R, CSF2RB, CSK, CTNNB1, DGKZ, DLG4, DOK1, DOK3, DOK4, EEF2K, EGFR, ELK1, EP300, ETS1, EVL, EZH2, FASLG, FCER2, FCGR2A, FLT1, FYB, FYN, GRAP, GRB10, GRIN1, GRIN2A, GRIN2B, GRIN2D, HDAC1, HDAC2, HDA…
GO:0001553	Removal of licensing factors from origins	REACTOME_Pathways_01.03.2017	4.5e-40	1.9e-37	9.7e-34	4.8e-33	[-1]	Group09	6.22222	196	[AGL, AGTR1, AKT1, AR, ARAF, BCAR1, BCL2, BCL6, BRAF, BRAP, CAMK4, CASP3, CASP8, CASP9, CAV1, CBL, CBLB, CD19, CD36, CD44, CD55, CD79A, CD79B, CDC25A, CDC25C, CDK1, CENPC, CIITA, CPNE1, CREBBP, CRK, CSF1R, CSF2RB, CSK, CTNNB1, DGKZ, DLG4, DOK1, DOK3, DOK4, EEF2K, EGFR, ELK1, EP300, ETS1, EVL, EZH2, FASLG, FCER2, FCGR2A, FLT1, FYB, FYN, GRAP, GRB10, GRIN1, GRIN2A, GRIN2B, GRIN2D, HDAC1, HDAC2, HDA…
GO:0001554	Regulation of DNA replication	REACTOME_Pathways_01.03.2017	4.5e-40	1.9e-37	9.7e-34	4.8e-33	[-1]	Group09	6.22222	196	[AGL, AGTR1, AKT1, AR, ARAF, BCAR1, BCL2, BCL6, BRAF, BRAP, CAMK4, CASP3, CASP8, CASP9, CAV1, CBL, CBLB, CD19, CD36, CD44, CD55, CD79A, CD79B, CDC25A, CDC25C, CDK1, CENPC, CIITA, CPNE1, CREBBP, CRK, CSF1R, CSF2RB, CSK, CTNNB1, DGKZ, DLG4, DOK1, DOK3, DOK4, EEF2K, EGFR, ELK1, EP300, ETS1, EVL, EZH2, FASLG, FCER2, FCGR2A, FLT1, FYB, FYN, GRAP, GRB10, GRIN1, GRIN2A, GRIN2B, GRIN2D, HDAC1, HDAC2, HDA…
GO:0001555	DNA Replication	REACTOME_Pathways_01.03.2017	4.5e-40	1.9e-37	9.7e-34	4.8e-33	[-1]	Group09	6.22222	196	[AGL, AGTR1, AKT1, AR, ARAF, BCAR1, BCL2, BCL6, BRAF, BRAP, CAMK4, CASP3, CASP8, CASP9, CAV1, CBL, CBLB, CD19, CD36, CD44, CD55, CD79A, CD79B, CDC25A, CDC25C, CDK1, CENPC, CIITA, CPNE1, CREBBP, CRK, CSF1R, CSF2RB, CSK, CTNNB1, DGKZ, DLG4, DOK1, DOK3, DOK4, EEF2K, EGFR, ELK1, EP300, ETS1, EVL, EZH2, FASLG, FCER2, FCGR2A, FLT1, FYB, FYN, GRAP, GRB10, GRIN1, GRIN2A, GRIN2B, GRIN2D, HDAC1, HDAC2, HDA…
GO:0001559	G2/M Checkpoints	REACTOME_Pathways_01.03.2017	4.5e-40	1.9e-37	9.7e-34	4.8e-33	[-1]	Group09	6.22222	196	[AGL, AGTR1, AKT1, AR, ARAF, BCAR1, BCL2, BCL6, BRAF, BRAP, CAMK4, CASP3, CASP8, CASP9, CAV1, CBL, CBLB, CD19, CD36, CD44, CD55, CD79A, CD79B, CDC25A, CDC25C, CDK1, CENPC, CIITA, CPNE1, CREBBP, CRK, CSF1R, CSF2RB, CSK, CTNNB1, DGKZ, DLG4, DOK1, DOK3, DOK4, EEF2K, EGFR, ELK1, EP300, ETS1, EVL, EZH2, FASLG, FCER2, FCGR2A, FLT1, FYB, FYN, GRAP, GRB10, GRIN1, GRIN2A, GRIN2B, GRIN2D, HDAC1, HDAC2, HDA…
GO:0001560	Stabilization of p53	REACTOME_Pathways_01.03.2017	4.5e-40	1.9e-37	9.7e-34	4.8e-33	[-1]	Group09	6.22222	196	[AGL, AGTR1, AKT1, AR, ARAF, BCAR1, BCL2, BCL6, BRAF, BRAP, CAMK4, CASP3, CASP8, CASP9, CAV1, CBL, CBLB, CD19, CD36, CD44, CD55, CD79A, CD79B, CDC25A, CDC25C, CDK1, CENPC, CIITA, CPNE1, CREBBP, CRK, CSF1R, CSF2RB, CSK, CTNNB1, DGKZ, DLG4, DOK1, DOK3, DOK4, EEF2K, EGFR, ELK1, EP300, ETS1, EVL, EZH2, FASLG, FCER2, FCGR2A, FLT1, FYB, FYN, GRAP, GRB10, GRIN1, GRIN2A, GRIN2B, GRIN2D, HDAC1, HDAC2, HDA…
GO:0001562	p53-Dependent G1 DNA Damage Response	REACTOME_Pathways_01.03.2017	4.5e-40	1.9e-37	9.7e-34	4.8e-33	[-1]	Group09	6.22222	196	[AGL, AGTR1, AKT1, AR, ARAF, BCAR1, BCL2, BCL6, BRAF, BRAP, CAMK4, CASP3, CASP8, CASP9, CAV1, CBL, CBLB, CD19, CD36, CD44, CD55, CD79A, CD79B, CDC25A, CDC25C, CDK1, CENPC, CIITA, CPNE1, CREBBP, CRK, CSF1R, CSF2RB, CSK, CTNNB1, DGKZ, DLG4, DOK1, DOK3, DOK4, EEF2K, EGFR, ELK1, EP300, ETS1, EVL, EZH2, FASLG, FCER2, FCGR2A, FLT1, FYB, FYN, GRAP, GRB10, GRIN1, GRIN2A, GRIN2B, GRIN2D, HDAC1, HDAC2, HDA…
GO:0001563	p53-Dependent G1/S DNA damage checkpoint	REACTOME_Pathways_01.03.2017	4.5e-40	1.9e-37	9.7e-34	4.8e-33	[-1]	Group09	6.22222	196	[AGL, AGTR1, AKT1, AR, ARAF, BCAR1, BCL2, BCL6, BRAF, BRAP, CAMK4, CASP3, CASP8, CASP9, CAV1, CBL, CBLB, CD19, CD36, CD44, CD55, CD79A, CD79B, CDC25A, CDC25C, CDK1, CENPC, CIITA, CPNE1, CREBBP, CRK, CSF1R, CSF2RB, CSK, CTNNB1, DGKZ, DLG4, DOK1, DOK3, DOK4, EEF2K, EGFR, ELK1, EP300, ETS1, EVL, EZH2, FASLG, FCER2, FCGR2A, FLT1, FYB, FYN, GRAP, GRB10, GRIN1, GRIN2A, GRIN2B, GRIN2D, HDAC1, HDAC2, HDA…
GO:0001564	Ubiquitin Mediated Degradation of Phosphorylated Cdc25A	REACTOME_Pathways_01.03.2017	4.5e-40	1.9e-37	9.7e-34	4.8e-33	[-1]	Group09	6.22222	196	[AGL, AGTR1, AKT1, AR, ARAF, BCAR1, BCL2, BCL6, BRAF, BRAP, CAMK4, CASP3, CASP8, CASP9, CAV1, CBL, CBLB, CD19, CD36, CD44, CD55, CD79A, CD79B, CDC25A, CDC25C, CDK1, CENPC, CIITA, CPNE1, CREBBP, CRK, CSF1R, CSF2RB, CSK, CTNNB1, DGKZ, DLG4, DOK1, DOK3, DOK4, EEF2K, EGFR, ELK1, EP300, ETS1, EVL, EZH2, FASLG, FCER2, FCGR2A, FLT1, FYB, FYN, GRAP, GRB10, GRIN1, GRIN2A, GRIN2B, GRIN2D, HDAC1, HDAC2, HDA…
GO:0001565	p53-Independent DNA Damage Response	REACTOME_Pathways_01.03.2017	4.5e-40	1.9e-37	9.7e-34	4.8e-33	[-1]	Group09	6.22222	196	[AGL, AGTR1, AKT1, AR, ARAF, BCAR1, BCL2, BCL6, BRAF, BRAP, CAMK4, CASP3, CASP8, CASP9, CAV1, CBL, CBLB, CD19, CD36, CD44, CD55, CD79A, CD79B, CDC25A, CDC25C, CDK1, CENPC, CIITA, CPNE1, CREBBP, CRK, CSF1R, CSF2RB, CSK, CTNNB1, DGKZ, DLG4, DOK1, DOK3, DOK4, EEF2K, EGFR, ELK1, EP300, ETS1, EVL, EZH2, FASLG, FCER2, FCGR2A, FLT1, FYB, FYN, GRAP, GRB10, GRIN1, GRIN2A, GRIN2B, GRIN2D, HDAC1, HDAC2, HDA…
GO:0001566	p53-Independent G1/S DNA damage checkpoint	REACTOME_Pathways_01.03.2017	4.5e-40	1.9e-37	9.7e-34	4.8e-33	[-1]	Group09	6.22222	196	[AGL, AGTR1, AKT1, AR, ARAF, BCAR1, BCL2, BCL6, BRAF, BRAP, CAMK4, CASP3, CASP8, CASP9, CAV1, CBL, CBLB, CD19, CD36, CD44, CD55, CD79A, CD79B, CDC25A, CDC25C, CDK1, CENPC, CIITA, CPNE1, CREBBP, CRK, CSF1R, CSF2RB, CSK, CTNNB1, DGKZ, DLG4, DOK1, DOK3, DOK4, EEF2K, EGFR, ELK1, EP300, ETS1, EVL, EZH2, FASLG, FCER2, FCGR2A, FLT1, FYB, FYN, GRAP, GRB10, GRIN1, GRIN2A, GRIN2B, GRIN2D, HDAC1, HDAC2, HDA…
GO:0001567	G1/S DNA Damage Checkpoints	REACTOME_Pathways_01.03.2017	4.5e-40	1.9e-37	9.7e-34	4.8e-33	[-1]	Group09	6.22222	196	[AGL, AGTR1, AKT1, AR, ARAF, BCAR1, BCL2, BCL6, BRAF, BRAP, CAMK4, CASP3, CASP8, CASP9, CAV1, CBL, CBLB, CD19, CD36, CD44, CD55, CD79A, CD79B, CDC25A, CDC25C, CDK1, CENPC, CIITA, CPNE1, CREBBP, CRK, CSF1R, CSF2RB, CSK, CTNNB1, DGKZ, DLG4, DOK1, DOK3, DOK4, EEF2K, EGFR, ELK1, EP300, ETS1, EVL, EZH2, FASLG, FCER2, FCGR2A, FLT1, FYB, FYN, GRAP, GRB10, GRIN1, GRIN2A, GRIN2B, GRIN2D, HDAC1, HDAC2, HDA…
GO:0001569	Cell Cycle Checkpoints	REACTOME_Pathways_01.03.2017	4.5e-40	1.9e-37	9.7e-34	4.8e-33	[-1]	Group09	6.22222	196	[AGL, AGTR1, AKT1, AR, ARAF, BCAR1, BCL2, BCL6, BRAF, BRAP, CAMK4, CASP3, CASP8, CASP9, CAV1, CBL, CBLB, CD19, CD36, CD44, CD55, CD79A, CD79B, CDC25A, CDC25C, CDK1, CENPC, CIITA, CPNE1, CREBBP, CRK, CSF1R, CSF2RB, CSK, CTNNB1, DGKZ, DLG4, DOK1, DOK3, DOK4, EEF2K, EGFR, ELK1, EP300, ETS1, EVL, EZH2, FASLG, FCER2, FCGR2A, FLT1, FYB, FYN, GRAP, GRB10, GRIN1, GRIN2A, GRIN2B, GRIN2D, HDAC1, HDAC2, HDA…
GO:0001659	Insulin receptor signalling cascade	REACTOME_Pathways_01.03.2017	4.5e-40	1.9e-37	9.7e-34	4.8e-33	[-1]	Group09	6.22222	196	[AGL, AGTR1, AKT1, AR, ARAF, BCAR1, BCL2, BCL6, BRAF, BRAP, CAMK4, CASP3, CASP8, CASP9, CAV1, CBL, CBLB, CD19, CD36, CD44, CD55, CD79A, CD79B, CDC25A, CDC25C, CDK1, CENPC, CIITA, CPNE1, CREBBP, CRK, CSF1R, CSF2RB, CSK, CTNNB1, DGKZ, DLG4, DOK1, DOK3, DOK4, EEF2K, EGFR, ELK1, EP300, ETS1, EVL, EZH2, FASLG, FCER2, FCGR2A, FLT1, FYB, FYN, GRAP, GRB10, GRIN1, GRIN2A, GRIN2B, GRIN2D, HDAC1, HDAC2, HDA…
GO:0001660	Signaling by Insulin receptor	REACTOME_Pathways_01.03.2017	4.5e-40	1.9e-37	9.7e-34	4.8e-33	[-1]	Group09	6.22222	196	[AGL, AGTR1, AKT1, AR, ARAF, BCAR1, BCL2, BCL6, BRAF, BRAP, CAMK4, CASP3, CASP8, CASP9, CAV1, CBL, CBLB, CD19, CD36, CD44, CD55, CD79A, CD79B, CDC25A, CDC25C, CDK1, CENPC, CIITA, CPNE1, CREBBP, CRK, CSF1R, CSF2RB, CSK, CTNNB1, DGKZ, DLG4, DOK1, DOK3, DOK4, EEF2K, EGFR, ELK1, EP300, ETS1, EVL, EZH2, FASLG, FCER2, FCGR2A, FLT1, FYB, FYN, GRAP, GRB10, GRIN1, GRIN2A, GRIN2B, GRIN2D, HDAC1, HDAC2, HDA…
GO:0001675	Ubiquitin-dependent degradation of Cyclin D	REACTOME_Pathways_01.03.2017	4.5e-40	1.9e-37	9.7e-34	4.8e-33	[-1]	Group09	6.22222	196	[AGL, AGTR1, AKT1, AR, ARAF, BCAR1, BCL2, BCL6, BRAF, BRAP, CAMK4, CASP3, CASP8, CASP9, CAV1, CBL, CBLB, CD19, CD36, CD44, CD55, CD79A, CD79B, CDC25A, CDC25C, CDK1, CENPC, CIITA, CPNE1, CREBBP, CRK, CSF1R, CSF2RB, CSK, CTNNB1, DGKZ, DLG4, DOK1, DOK3, DOK4, EEF2K, EGFR, ELK1, EP300, ETS1, EVL, EZH2, FASLG, FCER2, FCGR2A, FLT1, FYB, FYN, GRAP, GRB10, GRIN1, GRIN2A, GRIN2B, GRIN2D, HDAC1, HDAC2, HDA…
GO:0001720	Gastrin-CREB signalling pathway via PKC and MAPK	REACTOME_Pathways_01.03.2017	4.5e-40	1.9e-37	9.7e-34	4.8e-33	[-1]	Group09	6.22222	196	[AGL, AGTR1, AKT1, AR, ARAF, BCAR1, BCL2, BCL6, BRAF, BRAP, CAMK4, CASP3, CASP8, CASP9, CAV1, CBL, CBLB, CD19, CD36, CD44, CD55, CD79A, CD79B, CDC25A, CDC25C, CDK1, CENPC, CIITA, CPNE1, CREBBP, CRK, CSF1R, CSF2RB, CSK, CTNNB1, DGKZ, DLG4, DOK1, DOK3, DOK4, EEF2K, EGFR, ELK1, EP300, ETS1, EVL, EZH2, FASLG, FCER2, FCGR2A, FLT1, FYB, FYN, GRAP, GRB10, GRIN1, GRIN2A, GRIN2B, GRIN2D, HDAC1, HDAC2, HDA…
GO:0001740	The role of GTSE1 in G2/M progression after G2 checkpoint	REACTOME_Pathways_01.03.2017	4.5e-40	1.9e-37	9.7e-34	4.8e-33	[-1]	Group09	6.22222	196	[AGL, AGTR1, AKT1, AR, ARAF, BCAR1, BCL2, BCL6, BRAF, BRAP, CAMK4, CASP3, CASP8, CASP9, CAV1, CBL, CBLB, CD19, CD36, CD44, CD55, CD79A, CD79B, CDC25A, CDC25C, CDK1, CENPC, CIITA, CPNE1, CREBBP, CRK, CSF1R, CSF2RB, CSK, CTNNB1, DGKZ, DLG4, DOK1, DOK3, DOK4, EEF2K, EGFR, ELK1, EP300, ETS1, EVL, EZH2, FASLG, FCER2, FCGR2A, FLT1, FYB, FYN, GRAP, GRB10, GRIN1, GRIN2A, GRIN2B, GRIN2D, HDAC1, HDAC2, HDA…
GO:0001747	RET signaling	REACTOME_Pathways_01.03.2017	4.5e-40	1.9e-37	9.7e-34	4.8e-33	[-1]	Group09	6.22222	196	[AGL, AGTR1, AKT1, AR, ARAF, BCAR1, BCL2, BCL6, BRAF, BRAP, CAMK4, CASP3, CASP8, CASP9, CAV1, CBL, CBLB, CD19, CD36, CD44, CD55, CD79A, CD79B, CDC25A, CDC25C, CDK1, CENPC, CIITA, CPNE1, CREBBP, CRK, CSF1R, CSF2RB, CSK, CTNNB1, DGKZ, DLG4, DOK1, DOK3, DOK4, EEF2K, EGFR, ELK1, EP300, ETS1, EVL, EZH2, FASLG, FCER2, FCGR2A, FLT1, FYB, FYN, GRAP, GRB10, GRIN1, GRIN2A, GRIN2B, GRIN2D, HDAC1, HDAC2, HDA…
GO:0001748	FBXL7 down-regulates AURKA during mitotic entry and in early mitosis	REACTOME_Pathways_01.03.2017	4.5e-40	1.9e-37	9.7e-34	4.8e-33	[-1]	Group09	6.22222	196	[AGL, AGTR1, AKT1, AR, ARAF, BCAR1, BCL2, BCL6, BRAF, BRAP, CAMK4, CASP3, CASP8, CASP9, CAV1, CBL, CBLB, CD19, CD36, CD44, CD55, CD79A, CD79B, CDC25A, CDC25C, CDK1, CENPC, CIITA, CPNE1, CREBBP, CRK, CSF1R, CSF2RB, CSK, CTNNB1, DGKZ, DLG4, DOK1, DOK3, DOK4, EEF2K, EGFR, ELK1, EP300, ETS1, EVL, EZH2, FASLG, FCER2, FCGR2A, FLT1, FYB, FYN, GRAP, GRB10, GRIN1, GRIN2A, GRIN2B, GRIN2D, HDAC1, HDAC2, HDA…
GO:0001799	Interleukin receptor SHC signaling	REACTOME_Pathways_01.03.2017	4.5e-40	1.9e-37	9.7e-34	4.8e-33	[-1]	Group09	6.22222	196	[AGL, AGTR1, AKT1, AR, ARAF, BCAR1, BCL2, BCL6, BRAF, BRAP, CAMK4, CASP3, CASP8, CASP9, CAV1, CBL, CBLB, CD19, CD36, CD44, CD55, CD79A, CD79B, CDC25A, CDC25C, CDK1, CENPC, CIITA, CPNE1, CREBBP, CRK, CSF1R, CSF2RB, CSK, CTNNB1, DGKZ, DLG4, DOK1, DOK3, DOK4, EEF2K, EGFR, ELK1, EP300, ETS1, EVL, EZH2, FASLG, FCER2, FCGR2A, FLT1, FYB, FYN, GRAP, GRB10, GRIN1, GRIN2A, GRIN2B, GRIN2D, HDAC1, HDAC2, HDA…
GO:0001855	Signaling by the B Cell Receptor (BCR)	REACTOME_Pathways_01.03.2017	4.5e-40	1.9e-37	9.7e-34	4.8e-33	[-1]	Group09	6.22222	196	[AGL, AGTR1, AKT1, AR, ARAF, BCAR1, BCL2, BCL6, BRAF, BRAP, CAMK4, CASP3, CASP8, CASP9, CAV1, CBL, CBLB, CD19, CD36, CD44, CD55, CD79A, CD79B, CDC25A, CDC25C, CDK1, CENPC, CIITA, CPNE1, CREBBP, CRK, CSF1R, CSF2RB, CSK, CTNNB1, DGKZ, DLG4, DOK1, DOK3, DOK4, EEF2K, EGFR, ELK1, EP300, ETS1, EVL, EZH2, FASLG, FCER2, FCGR2A, FLT1, FYB, FYN, GRAP, GRB10, GRIN1, GRIN2A, GRIN2B, GRIN2D, HDAC1, HDAC2, HDA…
